# Supplementary material for: Climate Change Impacts on Plant Phenology: Grapevine (Vitis vinifera) Bud Break in Wintertime in Southern Italy
Source: MDPI journal article supplement (doi:10.3390/foods10112769), 2021-11-11
Supplement: s1 [file s1]

## SUPPLEMENTARY MATERIALS

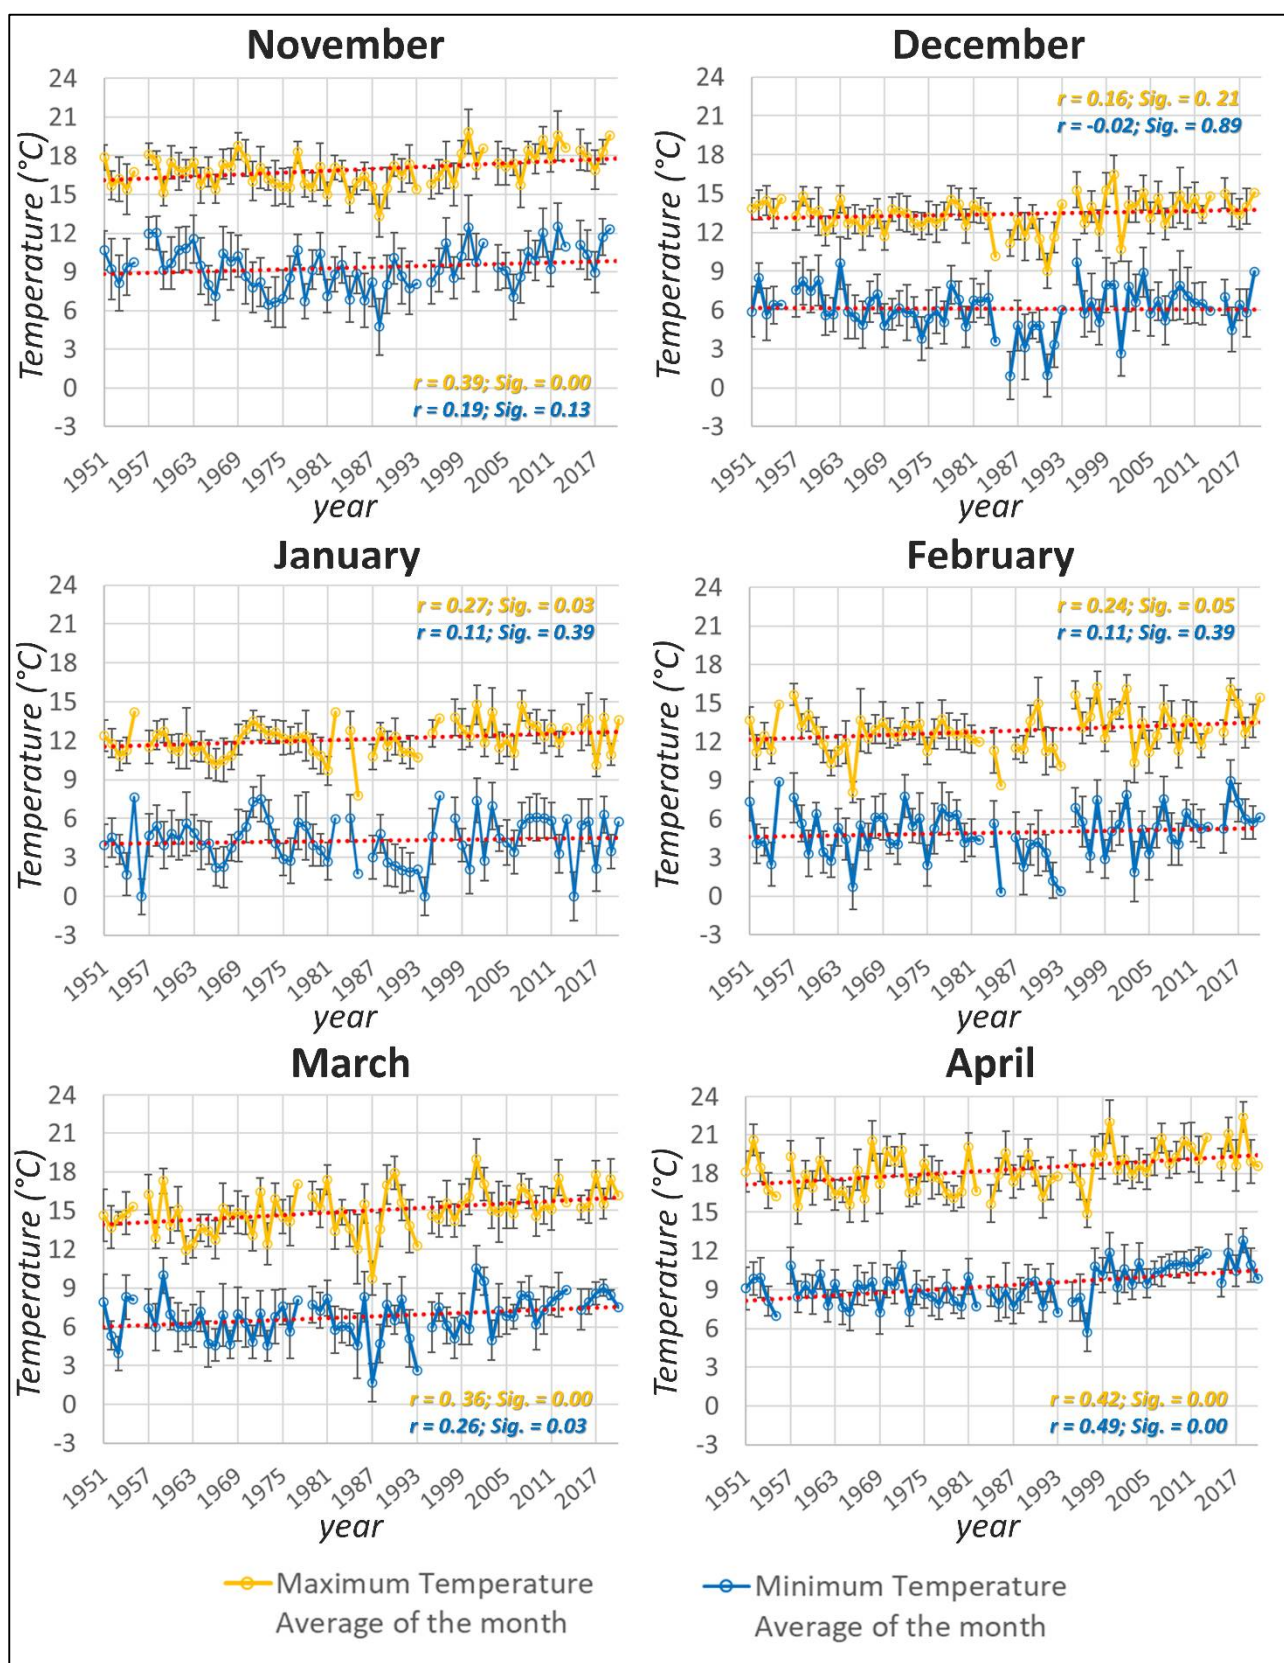

Figure S1: Maximum and minimum temperature trends during the period 1951-2020. Bars indicate the standard deviation of the records within the month. Red lines indicate the linear regression.

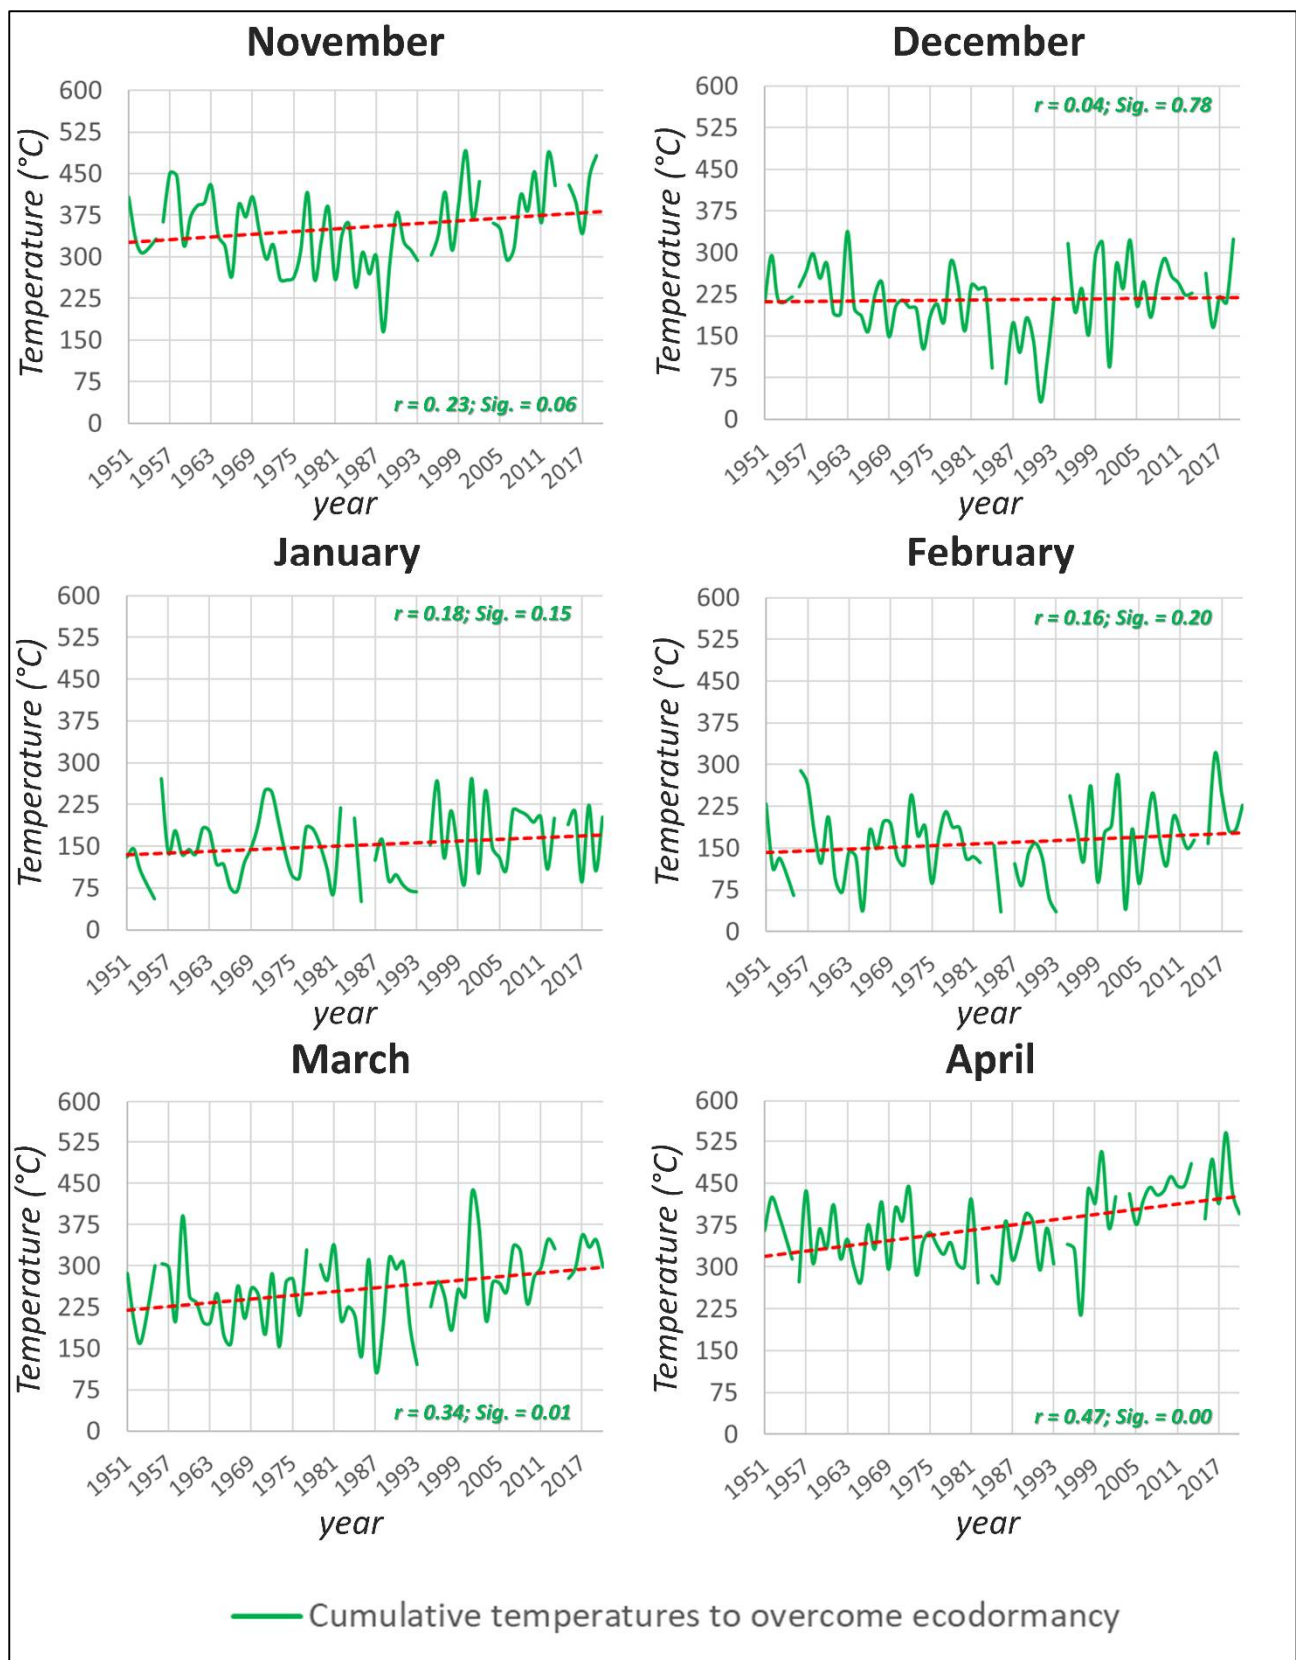

Figure S2: Trends of the cumulative temperatures to overcome ecodormancy during the period 1951-2020. Red lines indicate the linear regression.
