# Supplementary material for: Climate Change Impacts on Plant Phenology: Grapevine (Vitis vinifera) Bud Break in Wintertime in Southern Italy
Source: Foods. 2021 Nov 11;10(11):2769. doi: 10.3390/foods10112769 (PMC8621361; doi:10.3390/foods10112769)
Supplement: Supplementary file 1 [file foods-10-02769-s001.zip › Table S1.xlsx]

## Sheet: Sheet1
Table S1. SNP profiles of eight cultivars, genotyped at 18k loci. Original dataset was filtered based on SNP call quality (p50GC > 0.54), GenTrain score (> 0.6), missing data higher than 20% and monomorphic loci, resulting in 11,491 SNP loci. “AA”: homozygous for dominant allele; “BB”: homozygous for recessive allele; "AB": heterozygous; “NC”: missing data.
Name	Chr	Position	Strand	Allele	Baresana	Negroamaro	Malvasia nera di Brindisi	Malvasia bianca lunga	Seyve Villard 12.375	Bianco Palmento	Uva Gerusalemme	Sprino
ae_A_C_chr1_6610767	1	6610767	TOP	[A/C]	AA	AB	AB	AB	AA	AA	AB	AB
ae_A_C_chr10_random_180028	10_RANDOM	180028	BOT	[T/G]	AB	AB	AB	AB	AA	AB	AA	AB
ae_A_C_chr12_21420343	12	21420343	BOT	[T/G]	AA	AA	AA	AA	AB	AA	AA	AA
ae_A_C_chr15_2711219	15	2711219	BOT	[T/G]	AB	AA	AA	AA	AA	AA	AA	AA
ae_A_C_chr18_5108779	18	5108779	BOT	[T/G]	AB	AA	AA	AA	NC	AB	AB	AA
ae_A_C_chr19_12471978	19	12471978	BOT	[T/G]	AA	AA	AA	AA	AB	AA	AA	AA
ae_A_C_chr7_10968312	7	10968312	BOT	[T/G]	AB	AA	AA	AB	AA	AA	AA	AA
ae_A_C_chr7_17769886	7	17769886	BOT	[T/G]	BB	AB	AB	AB	AA	AB	BB	AA
ae_A_C_chr8_10484101	8	10484101	BOT	[T/G]	BB	AB	AB	BB	AB	AB	BB	AB
ae_A_G_chr1_12009877	1	12009877	TOP	[A/G]	AB	AA	AA	AA	AA	AA	AA	AA
ae_A_G_chr1_5617181	1	5617181	TOP	[A/G]	AA	AB	AB	AA	AA	AA	AA	AA
ae_A_G_chr10_3640271	10	3640271	TOP	[A/G]	AA	AA	AA	AA	AB	AA	AA	AA
ae_A_G_chr11_15743909	11	15743909	TOP	[A/G]	BB	BB	BB	AB	AB	AB	BB	AB
ae_A_G_chr11_16645109	11	16645109	BOT	[T/C]	AB	AA	AB	BB	AA	AB	AA	AB
ae_A_G_chr11_3510064	11	3510064	TOP	[A/G]	AA	AA	AA	AA	AA	AA	AA	AB
ae_A_G_chr12_14220095	12	14220095	BOT	[T/C]	AA	AA	AA	AA	BB	AA	AA	AA
ae_A_G_chr12_19009966	12	19009966	BOT	[T/C]	BB	BB	BB	BB	AB	BB	AB	BB
ae_A_G_chr12_3134412	12	3134412	TOP	[A/G]	AA	AA	AA	AA	AB	AA	AA	AA
ae_A_G_chr12_4102780	12	4102780	TOP	[A/G]	AA	AA	AA	AA	AB	AA	AA	AA
ae_A_G_chr12_5525641	12	5525641	TOP	[A/G]	AA	AA	AA	AA	AB	AA	AA	AA
ae_A_G_chr13_14408449	13	14408449	TOP	[A/G]	AA	AA	AA	AA	AB	AA	AA	AA
ae_A_G_chr13_2195752	13	2195752	TOP	[A/G]	AB	AB	BB	AB	AA	AA	AA	AA
ae_A_G_chr15_190284	15	190284	TOP	[A/G]	AA	AA	AA	AA	AB	AA	AA	AA
ae_A_G_chr15_9129971	15	9129971	TOP	[A/G]	AA	AA	AA	AA	AB	AA	AA	AA
ae_A_G_chr17_3674562	17	3674562	BOT	[T/C]	AA	AA	AA	AA	NC	AA	AA	AA
ae_A_G_chr19_5644705	19	5644705	TOP	[A/G]	AB	BB	BB	BB	BB	AB	BB	BB
ae_A_G_chr5_11016065	5	11016065	TOP	[A/G]	AB	BB	BB	BB	AB	AB	BB	BB
ae_A_G_chr5_1201245	5	1201245	BOT	[T/C]	AA	AA	AA	AA	AA	AA	NC	AA
ae_A_G_chr5_14924800	5	14924800	TOP	[A/G]	AA	AA	AA	AA	AB	AA	AA	AA
ae_A_G_chr5_6125422	5	6125422	BOT	[T/C]	AA	AA	AA	AA	AB	AA	AA	AA
ae_A_G_chr6_13919398	6	13919398	TOP	[A/G]	AA	AA	AA	AA	AB	AA	AA	AA
ae_A_G_chr7_20676768	7	20676768	BOT	[T/C]	AB	AA	AA	AA	BB	AB	NC	AB
ae_A_G_chr7_2196512	7	2196512	TOP	[A/G]	AA	AA	AB	AB	AB	AA	AA	AB
ae_A_G_chr7_5592008	7	5592008	BOT	[T/C]	AA	AA	AA	AA	BB	AA	AA	AA
ae_A_G_chr7_785867	7	785867	TOP	[A/G]	AA	AA	AA	AA	NC	AA	AA	AA
ae_A_G_chr7_random_1168412	7_RANDOM	1168412	TOP	[A/G]	AA	AA	AA	AA	AB	AA	AA	AA
ae_A_G_chr8_11440804	8	11440804	TOP	[A/G]	AA	AA	AA	AA	AB	AB	AA	AB
ae_A_G_chr8_3638139	8	3638139	BOT	[T/C]	AA	AB	AA	AA	AB	AA	AB	AA
ae_A_G_chr8_8051170	8	8051170	BOT	[T/C]	BB	BB	BB	BB	BB	BB	AB	BB
ae_A_G_chr9_5654412	9	5654412	BOT	[T/C]	AA	NC	NC	NC	AA	AA	NC	NC
ae_A_G_chr9_6085689	9	6085689	TOP	[A/G]	AA	NC	NC	BB	BB	AA	AA	BB
ae_A_G_chrUn_21404448	UN	21404448	BOT	[T/C]	BB	BB	AB	AA	BB	BB	BB	BB
ae_A_G_chrUn_28300065	UN	28300065	BOT	[T/C]	AA	AA	AA	AA	AA	AA	NC	AA
ae_A_G_chrUn_7295086	UN	7295086	TOP	[A/G]	AA	AA	AA	AA	AB	AA	AA	AA
ae_C_A_chr12_6484660	12	6484660	TOP	[A/C]	BB	BB	BB	BB	AB	BB	BB	BB
ae_C_A_chr12_random_222840	12_RANDOM	222840	BOT	[T/G]	AB	AB	AB	AB	BB	AB	AB	AB
ae_C_A_chr14_20097630	14	20097630	TOP	[A/C]	BB	BB	BB	BB	BB	AB	AA	AB
ae_C_A_chr14_3175972	14	3175972	TOP	[A/C]	BB	BB	BB	BB	BB	BB	AB	BB
ae_C_A_chr3_12292441	3	12292441	BOT	[T/G]	BB	AB	AB	BB	AB	BB	AB	BB
ae_C_A_chr7_14047666	7	14047666	BOT	[T/G]	BB	BB	BB	BB	AA	BB	BB	BB
ae_C_A_chr9_22265234	9	22265234	TOP	[A/C]	BB	BB	BB	BB	NC	BB	BB	BB
ae_C_A_chrUn_2188445	UN	2188445	BOT	[T/G]	BB	BB	BB	BB	NC	BB	BB	BB
ae_C_T_chr10_12028126	10	12028126	TOP	[A/G]	BB	BB	BB	BB	AB	BB	BB	BB
ae_C_T_chr10_13908940	10	13908940	TOP	[A/G]	BB	BB	BB	BB	AB	BB	BB	BB
ae_C_T_chr11_10862321	11	10862321	TOP	[A/G]	BB	BB	BB	BB	AB	BB	BB	BB
ae_C_T_chr11_11335247	11	11335247	TOP	[A/G]	AB	BB	AB	AB	AB	AB	BB	BB
ae_C_T_chr11_14246811	11	14246811	BOT	[T/C]	BB	BB	AB	AB	BB	BB	BB	BB
ae_C_T_chr11_18582591	11	18582591	BOT	[T/C]	BB	BB	BB	BB	AB	BB	BB	BB
ae_C_T_chr12_10296309	12	10296309	TOP	[A/G]	BB	AB	AB	BB	AA	AB	BB	AB
ae_C_T_chr12_15177907	12	15177907	BOT	[T/C]	BB	BB	BB	BB	AB	BB	BB	BB
ae_C_T_chr12_15662583	12	15662583	BOT	[T/C]	BB	BB	BB	BB	NC	BB	BB	BB
ae_C_T_chr13_10002445	13	10002445	BOT	[T/C]	BB	BB	BB	BB	AB	BB	BB	BB
ae_C_T_chr13_11495499	13	11495499	BOT	[T/C]	NC	BB	BB	BB	BB	BB	BB	BB
ae_C_T_chr13_16311903	13	16311903	BOT	[T/C]	BB	AB	BB	AB	BB	BB	BB	AB
ae_C_T_chr13_4632083	13	4632083	BOT	[T/C]	BB	BB	BB	BB	AB	BB	BB	BB
ae_C_T_chr13_7084481	13	7084481	TOP	[A/G]	BB	BB	BB	BB	AB	BB	BB	BB
ae_C_T_chr13_random_193983	13_RANDOM	193983	BOT	[T/C]	AB	BB	BB	BB	NC	BB	BB	BB
ae_C_T_chr14_15368394	14	15368394	TOP	[A/G]	BB	BB	BB	BB	NC	BB	BB	BB
ae_C_T_chr14_23180125	14	23180125	TOP	[A/G]	BB	BB	BB	BB	AB	BB	BB	BB
ae_C_T_chr14_25602467	14	25602467	BOT	[T/C]	BB	BB	BB	BB	AB	BB	BB	BB
ae_C_T_chr14_26094150	14	26094150	BOT	[T/C]	BB	BB	BB	AB	BB	BB	BB	BB
ae_C_T_chr14_27547990	14	27547990	BOT	[T/C]	BB	BB	NC	BB	AA	BB	BB	BB
ae_C_T_chr14_8570862	14	8570862	BOT	[T/C]	BB	BB	BB	BB	AB	BB	BB	BB
ae_C_T_chr14_9959506	14	9959506	BOT	[T/C]	BB	BB	BB	BB	AB	BB	BB	BB
ae_C_T_chr15_1736382	15	1736382	BOT	[T/C]	BB	BB	BB	BB	AB	BB	BB	BB
ae_C_T_chr15_4659239	15	4659239	BOT	[T/C]	BB	BB	BB	BB	BB	BB	NC	BB
ae_C_T_chr15_8137144	15	8137144	BOT	[T/C]	BB	BB	BB	BB	AB	BB	BB	BB
ae_C_T_chr15_9672077	15	9672077	BOT	[T/C]	BB	BB	BB	BB	AB	BB	BB	BB
ae_C_T_chr16_7100979	16	7100979	BOT	[T/C]	AA	AA	AB	BB	AA	AA	AB	AA
ae_C_T_chr17_1232702	17	1232702	BOT	[T/C]	AA	AA	AB	BB	BB	AA	NC	AB
ae_C_T_chr17_14392242	17	14392242	BOT	[T/C]	NC	BB	BB	BB	NC	NC	BB	BB
ae_C_T_chr17_16381102	17	16381102	BOT	[T/C]	BB	BB	BB	BB	NC	BB	BB	BB
ae_C_T_chr17_3193684	17	3193684	BOT	[T/C]	BB	BB	BB	BB	AB	BB	BB	BB
ae_C_T_chr17_4691093	17	4691093	TOP	[A/G]	BB	BB	BB	BB	AB	BB	BB	BB
ae_C_T_chr18_20281014	18	20281014	BOT	[T/C]	BB	BB	BB	BB	NC	BB	BB	BB
ae_C_T_chr18_28099326	18	28099326	TOP	[A/G]	BB	BB	BB	BB	AB	BB	BB	BB
ae_C_T_chr19_16821449	19	16821449	TOP	[A/G]	AB	AA	AA	AB	AB	AB	AB	BB
ae_C_T_chr19_19802985	19	19802985	TOP	[A/G]	AA	AA	AB	BB	AB	BB	AB	BB
ae_C_T_chr2_6212991	2	6212991	BOT	[T/C]	BB	BB	BB	BB	AB	BB	BB	BB
ae_C_T_chr2_684788	2	684788	BOT	[T/C]	BB	BB	BB	BB	NC	BB	BB	BB
ae_C_T_chr3_8428695	3	8428695	TOP	[A/G]	AB	BB	BB	BB	BB	AB	BB	BB
ae_C_T_chr4_23602042	4	23602042	BOT	[T/C]	BB	BB	BB	AB	BB	BB	AA	AB
ae_C_T_chr5_9048060	5	9048060	BOT	[T/C]	BB	BB	BB	BB	AB	BB	BB	BB
ae_C_T_chr5_9554337	5	9554337	BOT	[T/C]	NC	NC	NC	BB	AB	BB	BB	NC
ae_C_T_chr7_11451080	7	11451080	BOT	[T/C]	BB	NC	BB	BB	BB	BB	BB	BB
ae_C_T_chr8_11915730	8	11915730	BOT	[T/C]	BB	AB	BB	BB	BB	BB	BB	BB
ae_C_T_chr8_12405612	8	12405612	TOP	[A/G]	AB	BB	AB	AA	AA	AA	AB	AA
ae_C_T_chr8_15274126	8	15274126	TOP	[A/G]	AB	BB	BB	BB	AB	AB	BB	AB
ae_C_T_chr8_7494108	8	7494108	BOT	[T/C]	BB	BB	BB	BB	BB	NC	BB	NC
ae_C_T_chr8_9929378	8	9929378	TOP	[A/G]	AB	AA	AA	AA	AA	AB	AB	AB
ae_C_T_chr9_11099124	9	11099124	BOT	[T/C]	BB	BB	BB	NC	NC	NC	BB	NC
ae_C_T_chr9_12948624	9	12948624	BOT	[T/C]	AB	AB	AB	AA	AB	AA	AB	AA
ae_C_T_chr9_14427040	9	14427040	BOT	[T/C]	AB	AB	AB	BB	NC	AB	AB	AB
ae_C_T_chr9_20411010	9	20411010	BOT	[T/C]	AB	BB	BB	AB	BB	AB	BB	BB
ae_C_T_chrUn_11424446	UN	11424446	BOT	[T/C]	BB	BB	BB	BB	AB	BB	BB	BB
ae_C_T_chrUn_13375345	UN	13375345	BOT	[T/C]	BB	AB	AB	BB	BB	BB	AB	BB
ae_C_T_chrUn_39289213	UN	39289213	BOT	[T/C]	AB	AB	BB	BB	AB	BB	AB	AB
ae_G_A_chr1_5144110	1	5144110	TOP	[A/G]	AB	AA	AA	AA	AB	AB	AA	AB
ae_G_A_chr1_random_98632	1_RANDOM	98632	BOT	[T/C]	BB	BB	NC	NC	NC	BB	NC	BB
ae_G_A_chr10_11518237	10	11518237	BOT	[T/C]	BB	BB	BB	BB	AB	BB	BB	BB
ae_G_A_chr10_14974827	10	14974827	BOT	[T/C]	BB	BB	BB	BB	AB	BB	BB	BB
ae_G_A_chr10_16403065	10	16403065	TOP	[A/G]	BB	AA	BB	BB	AA	BB	BB	BB
ae_G_A_chr10_5178423	10	5178423	TOP	[A/G]	AA	AA	AA	AA	AA	AA	AA	AB
ae_G_A_chr10_7063400	10	7063400	TOP	[A/G]	BB	NC	NC	BB	BB	BB	BB	BB
ae_G_A_chr10_7547524	10	7547524	TOP	[A/G]	BB	BB	BB	BB	AA	BB	BB	BB
ae_G_A_chr11_16165830	11	16165830	BOT	[T/C]	BB	NC	BB	BB	BB	NC	BB	NC
ae_G_A_chr12_11809331	12	11809331	BOT	[T/C]	BB	BB	BB	BB	NC	BB	BB	BB
ae_G_A_chr13_10487138	13	10487138	BOT	[T/C]	BB	BB	BB	BB	AB	BB	BB	BB
ae_G_A_chr13_13401962	13	13401962	TOP	[A/G]	BB	BB	BB	BB	BB	BB	NC	BB
ae_G_A_chr13_17736241	13	17736241	BOT	[T/C]	AB	BB	BB	BB	AB	BB	BB	BB
ae_G_A_chr13_21755293	13	21755293	BOT	[T/C]	BB	BB	BB	BB	AA	BB	BB	BB
ae_G_A_chr13_8578178	13	8578178	TOP	[A/G]	BB	AB	AB	AA	AA	BB	AB	AB
ae_G_A_chr14_10528310	14	10528310	TOP	[A/G]	BB	BB	BB	BB	BB	BB	BB	AB
ae_G_A_chr14_11819563	14	11819563	BOT	[T/C]	BB	AB	AB	BB	AB	BB	BB	BB
ae_G_A_chr14_29050133	14	29050133	TOP	[A/G]	BB	BB	BB	BB	BB	AB	NC	BB
ae_G_A_chr14_3638032	14	3638032	TOP	[A/G]	BB	AB	BB	BB	NC	BB	AA	NC
ae_G_A_chr14_7042208	14	7042208	BOT	[T/C]	BB	BB	BB	BB	AB	BB	BB	BB
ae_G_A_chr15_11606748	15	11606748	BOT	[T/C]	BB	BB	BB	BB	AB	BB	BB	BB
ae_G_A_chr15_3715739	15	3715739	TOP	[A/G]	BB	BB	BB	BB	AB	BB	BB	BB
ae_G_A_chr16_18792971	16	18792971	BOT	[T/C]	AB	AB	AB	BB	BB	AB	BB	BB
ae_G_A_chr17_12501521	17	12501521	BOT	[T/C]	BB	BB	BB	BB	AB	BB	AB	BB
ae_G_A_chr17_6143950	17	6143950	TOP	[A/G]	BB	BB	BB	BB	AA	BB	BB	BB
ae_G_A_chr17_7095090	17	7095090	BOT	[T/C]	BB	BB	BB	BB	AB	BB	NC	BB
ae_G_A_chr17_8074014	17	8074014	TOP	[A/G]	BB	BB	BB	BB	AB	BB	BB	BB
ae_G_A_chr18_14380454	18	14380454	TOP	[A/G]	BB	BB	BB	BB	AB	BB	BB	BB
ae_G_A_chr18_233857	18	233857	TOP	[A/G]	BB	BB	BB	BB	NC	BB	BB	BB
ae_G_A_chr18_25653210	18	25653210	BOT	[T/C]	AB	AB	AB	BB	BB	AB	AB	BB
ae_G_A_chr18_29078922	18	29078922	TOP	[A/G]	BB	BB	BB	BB	AB	BB	BB	BB
ae_G_A_chr19_10514363	19	10514363	BOT	[T/C]	BB	BB	BB	BB	BB	BB	NC	BB
ae_G_A_chr19_12980311	19	12980311	TOP	[A/G]	BB	AB	AB	BB	BB	BB	BB	BB
ae_G_A_chr19_20817564	19	20817564	TOP	[A/G]	BB	AB	AB	BB	AB	BB	BB	BB
ae_G_A_chr19_8552840	19	8552840	TOP	[A/G]	BB	BB	BB	NC	BB	BB	BB	NC
ae_G_A_chr19_9535449	19	9535449	BOT	[T/C]	BB	BB	BB	NC	BB	BB	BB	NC
ae_G_A_chr2_10120362	2	10120362	BOT	[T/C]	NC	BB	BB	BB	BB	BB	NC	BB
ae_G_A_chr2_13046659	2	13046659	TOP	[A/G]	BB	BB	BB	AB	BB	AB	BB	BB
ae_G_A_chr2_5683137	2	5683137	TOP	[A/G]	BB	BB	AB	AB	BB	BB	BB	BB
ae_G_A_chr2_9411474	2	9411474	BOT	[T/C]	BB	BB	BB	BB	AB	BB	BB	BB
ae_G_A_chr3_15701125	3	15701125	TOP	[A/G]	NC	BB	BB	AB	BB	BB	NC	BB
ae_G_A_chr3_18083815	3	18083815	TOP	[A/G]	AB	BB	BB	AB	BB	BB	AB	BB
ae_G_A_chr3_18510549	3	18510549	BOT	[T/C]	AB	BB	AB	AB	BB	AA	BB	AA
ae_G_A_chr4_6088748	4	6088748	BOT	[T/C]	AB	BB	BB	BB	BB	AB	BB	BB
ae_G_A_chr5_10011186	5	10011186	BOT	[T/C]	BB	BB	BB	BB	NC	BB	BB	BB
ae_G_A_chr5_13443752	5	13443752	TOP	[A/G]	BB	BB	BB	BB	BB	BB	BB	AB
ae_G_A_chr5_22267971	5	22267971	BOT	[T/C]	BB	BB	BB	BB	NC	BB	BB	BB
ae_G_A_chr5_23204037	5	23204037	TOP	[A/G]	BB	BB	BB	BB	AB	BB	BB	BB
ae_G_A_chr5_279247	5	279247	TOP	[A/G]	AB	AB	AB	AB	AB	AB	AB	BB
ae_G_A_chr5_5557577	5	5557577	TOP	[A/G]	BB	BB	BB	BB	AB	BB	BB	BB
ae_G_A_chr5_random_127400	5_RANDOM	127400	TOP	[A/G]	BB	BB	BB	BB	AB	BB	BB	BB
ae_G_A_chr6_4153548	6	4153548	BOT	[T/C]	BB	AB	BB	BB	BB	BB	AB	AB
ae_G_A_chr6_755352	6	755352	TOP	[A/G]	BB	BB	AB	AB	AB	BB	AA	BB
ae_G_A_chr7_1677797	7	1677797	TOP	[A/G]	BB	BB	BB	BB	AB	BB	BB	BB
ae_G_A_chr7_5126819	7	5126819	BOT	[T/C]	BB	BB	BB	BB	NC	BB	BB	BB
ae_G_A_chr8_10953490	8	10953490	BOT	[T/C]	BB	BB	NC	NC	NC	BB	BB	BB
ae_G_A_chr9_18354195	9	18354195	TOP	[A/G]	BB	BB	BB	BB	BB	AB	BB	AB
ae_G_A_chr9_2698879	9	2698879	BOT	[T/C]	AB	BB	AB	AB	AB	AB	AB	AB
ae_G_A_chr9_7573501	9	7573501	TOP	[A/G]	BB	AB	AB	BB	BB	BB	AB	BB
ae_G_A_chrUn_16798123	UN	16798123	BOT	[T/C]	BB	BB	BB	BB	BB	BB	NC	BB
ae_G_A_chrUn_2770990	UN	2770990	BOT	[T/C]	BB	BB	BB	BB	AB	BB	BB	BB
ae_G_A_chrUn_29805613	UN	29805613	BOT	[T/C]	NC	BB	BB	BB	BB	BB	NC	BB
ae_G_A_chrUn_3261859	UN	3261859	TOP	[A/G]	NC	BB	BB	BB	NC	NC	BB	BB
ae_G_A_chrUn_36300410	UN	36300410	BOT	[T/C]	BB	BB	BB	BB	AB	BB	BB	BB
ae_G_A_chrUn_39819168	UN	39819168	TOP	[A/G]	BB	AB	BB	BB	BB	BB	BB	BB
ae_G_T_chr1_12492270	1	12492270	TOP	[A/C]	BB	BB	BB	BB	AB	BB	BB	BB
ae_G_T_chr12_20463861	12	20463861	TOP	[A/C]	AB	AB	BB	BB	BB	AB	AB	AB
ae_G_T_chr13_11952742	13	11952742	TOP	[A/C]	NC	BB	BB	NC	AB	BB	BB	BB
ae_G_T_chr14_4158319	14	4158319	BOT	[T/G]	BB	BB	AB	AB	BB	BB	BB	AA
ae_G_T_chr15_12197010	15	12197010	TOP	[A/C]	BB	BB	BB	BB	AB	BB	BB	BB
ae_G_T_chr3_17134310	3	17134310	BOT	[T/G]	AA	BB	AB	AA	BB	AA	AA	AA
ae_G_T_chr3_random_526900	3_RANDOM	526900	TOP	[A/C]	BB	BB	BB	BB	AB	BB	BB	BB
ae_G_T_chr4_247785	4	247785	TOP	[A/C]	BB	BB	BB	BB	BB	BB	BB	NC
ae_G_T_chr9_4165585	9	4165585	TOP	[A/C]	BB	BB	BB	BB	AB	BB	BB	BB
ae_G_T_chrUn_18404031	UN	18404031	BOT	[T/G]	BB	BB	BB	BB	BB	BB	BB	AB
ae_G_T_chrUn_27275496	UN	27275496	TOP	[A/C]	BB	BB	AB	AB	AB	BB	BB	BB
ae_G_T_chrUn_41765636	UN	41765636	TOP	[A/C]	AA	BB	BB	AB	BB	AB	NC	AA
ae_G_T_chrUn_9268896	UN	9268896	TOP	[A/C]	BB	BB	BB	BB	AB	BB	BB	BB
ae_T_C_chr1_10024059	1	10024059	BOT	[T/C]	AA	AA	AA	AA	AA	AA	NC	AA
ae_T_C_chr1_21777172	1	21777172	TOP	[A/G]	AB	AA	AA	AB	AA	AA	BB	AB
ae_T_C_chr1_2193460	1	2193460	BOT	[T/C]	AA	AA	AA	AA	AA	AA	NC	AA
ae_T_C_chr1_random_488154	1_RANDOM	488154	TOP	[A/G]	AA	AA	AA	AA	AB	AA	AA	AA
ae_T_C_chr12_9318363	12	9318363	BOT	[T/C]	AA	AA	AA	AA	AB	AA	AA	AA
ae_T_C_chr13_18753907	13	18753907	TOP	[A/G]	AA	AA	AB	AB	AA	AA	AA	AA
ae_T_C_chr13_248917	13	248917	BOT	[T/C]	AA	AA	AA	AA	AB	AA	AA	AA
ae_T_C_chr13_5118258	13	5118258	TOP	[A/G]	AA	AB	AA	AA	AA	AA	AA	AA
ae_T_C_chr13_6592984	13	6592984	TOP	[A/G]	AA	AA	AA	AA	BB	AA	AA	AA
ae_T_C_chr13_7994932	13	7994932	TOP	[A/G]	AA	AA	AA	AA	NC	AA	AA	AA
ae_T_C_chr13_9028929	13	9028929	BOT	[T/C]	AA	AB	AB	AA	AA	AB	AA	AB
ae_T_C_chr14_16305233	14	16305233	BOT	[T/C]	AA	AA	AA	AA	AA	AA	AA	BB
ae_T_C_chr14_24654531	14	24654531	BOT	[T/C]	BB	AB	AB	BB	AB	BB	AB	BB
ae_T_C_chr14_6091664	14	6091664	TOP	[A/G]	AA	AA	AA	AA	AB	AA	AA	AA
ae_T_C_chr15_2234853	15	2234853	BOT	[T/C]	AA	AA	AA	AA	AB	AA	AA	AA
ae_T_C_chr16_9570045	16	9570045	BOT	[T/C]	BB	AB	AB	AA	AB	BB	AA	AB
ae_T_C_chr17_6596171	17	6596171	TOP	[A/G]	AA	AA	AA	AA	AB	AA	AA	AA
ae_T_C_chr17_8562681	17	8562681	BOT	[T/C]	AA	AA	AA	AA	NC	AA	AA	AA
ae_T_C_chr18_10011661	18	10011661	BOT	[T/C]	AA	AA	AA	AA	AB	AA	AA	AA
ae_T_C_chr18_1272563	18	1272563	BOT	[T/C]	AB	AA	AA	AB	AA	AB	AA	AA
ae_T_C_chr18_18812981	18	18812981	TOP	[A/G]	AA	AB	AB	BB	BB	AB	BB	BB
ae_T_C_chr18_2695109	18	2695109	BOT	[T/C]	AA	AA	AA	AA	AB	AA	AA	AA
ae_T_C_chr18_4606097	18	4606097	BOT	[T/C]	AA	AA	AA	AA	AB	AA	AA	AA
ae_T_C_chr2_1222166	2	1222166	BOT	[T/C]	AB	AA	AA	AA	AA	AB	AA	AA
ae_T_C_chr2_7674702	2	7674702	TOP	[A/G]	AA	AA	AA	AA	AB	AA	AA	AA
ae_T_C_chr3_13237815	3	13237815	BOT	[T/C]	AA	AA	AA	AA	AB	AA	AA	AA
ae_T_C_chr3_16164211	3	16164211	TOP	[A/G]	AA	AA	AA	AA	AB	AA	AA	AA
ae_T_C_chr3_7657562	3	7657562	BOT	[T/C]	AA	AB	AB	AA	BB	AB	AA	AB
ae_T_C_chr4_random_22936	4_RANDOM	22936	BOT	[T/C]	BB	AB	AB	AB	BB	AB	AA	AA
ae_T_C_chr5_15914192	5	15914192	BOT	[T/C]	AA	AA	AA	AA	AB	AA	AA	AA
ae_T_C_chr5_17361220	5	17361220	BOT	[T/C]	AB	BB	AB	AB	BB	AB	BB	AB
ae_T_C_chr5_19322416	5	19322416	TOP	[A/G]	AA	AA	AA	AA	AB	AA	AA	AA
ae_T_C_chr5_777390	5	777390	BOT	[T/C]	AB	AA	AA	AA	AB	AB	AB	AA
ae_T_C_chr7_16293707	7	16293707	TOP	[A/G]	AA	AA	AA	AA	AB	AA	AA	AA
ae_T_C_chr7_19743504	7	19743504	TOP	[A/G]	AA	AB	AA	AA	BB	AA	AA	AA
ae_T_C_chr7_4621119	7	4621119	BOT	[T/C]	AA	AA	AA	AA	NC	AA	AA	AA
ae_T_C_chr9_21783518	9	21783518	TOP	[A/G]	AA	AA	AA	AA	AB	AA	AA	AA
ae_T_C_chrUn_11790439	UN	11790439	BOT	[T/C]	AA	AA	AA	AA	AB	AA	AA	AA
ae_T_C_chrUn_14269716	UN	14269716	TOP	[A/G]	AB	AA	AA	AA	BB	AA	AA	AA
ae_T_C_chrUn_16260786	UN	16260786	BOT	[T/C]	AA	AA	AB	AB	NC	AA	AA	AA
ae_T_C_chrUn_41217698	UN	41217698	BOT	[T/C]	AA	AA	AA	AA	AA	AA	NC	AA
ae_T_G_chr14_30013569	14	30013569	BOT	[T/G]	AA	AA	AA	AA	AA	AA	NC	AA
ae_T_G_chr2_1726279	2	1726279	BOT	[T/G]	AA	AB	NC	AB	NC	AB	AA	AB
ae_T_G_chr9_17306368	9	17306368	BOT	[T/G]	AA	AB	AB	AA	AA	AA	AB	AA
ae_T_G_chrUn_12270687	UN	12270687	TOP	[A/C]	AA	AA	AA	AA	AB	AA	AA	AA
ae_T_G_chrUn_37078744	UN	37078744	BOT	[T/G]	AA	AA	AA	AA	AB	AA	AA	AA
be_A_C_chr13_1253531	13	1253531	TOP	[A/C]	AA	AA	AA	AA	AB	AA	AA	AA
be_A_C_chr13_3155657	13	3155657	TOP	[A/C]	AA	AA	AA	AA	AB	AA	AA	AA
be_A_C_chr15_6633562	15	6633562	BOT	[T/G]	AA	AA	AA	NC	AA	AA	AA	AA
be_A_C_chr5_random_293310	5_RANDOM	293310	TOP	[A/C]	AA	AA	AA	AA	AA	AA	AA	AB
be_A_C_chr7_18319099	7	18319099	BOT	[T/G]	BB	BB	BB	AB	AA	BB	BB	BB
be_A_C_chr7_2330567	7	2330567	BOT	[T/G]	NC	NC	NC	NC	AA	NC	AA	AA
be_A_C_chr8_16736470	8	16736470	BOT	[T/G]	AA	AA	AA	AA	AB	AA	AA	AA
be_A_C_chrUn_33595417	UN	33595417	TOP	[A/C]	AA	AA	AA	AA	AB	AA	AA	AA
be_A_G_chr1_14448219	1	14448219	BOT	[T/C]	AA	AA	AA	AA	AB	AA	AA	AA
be_A_G_chr1_230083	1	230083	TOP	[A/G]	AA	AA	AA	AA	AA	NC	AA	AA
be_A_G_chr10_1690711	10	1690711	BOT	[T/C]	BB	AA	AB	AB	AA	AB	AA	AB
be_A_G_chr11_13215100	11	13215100	TOP	[A/G]	AB	NC	BB	BB	NC	AB	BB	AB
be_A_G_chr11_14626769	11	14626769	TOP	[A/G]	AA	AA	AA	AA	AB	AA	AA	AA
be_A_G_chr12_263134	12	263134	TOP	[A/G]	AA	AA	AA	AA	AB	AA	AA	AA
be_A_G_chr14_19385840	14	19385840	TOP	[A/G]	AA	AB	AA	AA	AA	AB	AB	BB
be_A_G_chr14_20322871	14	20322871	BOT	[T/C]	AA	AA	AA	AA	AA	AA	NC	AA
be_A_G_chr15_12546751	15	12546751	TOP	[A/G]	AA	AA	AA	AB	AB	AA	AA	AA
be_A_G_chr16_14931970	16	14931970	TOP	[A/G]	AA	AA	AA	AA	AA	AA	AB	AA
be_A_G_chr16_17423694	16	17423694	TOP	[A/G]	AB	AA	AA	AA	AA	AA	AA	AA
be_A_G_chr16_19334123	16	19334123	TOP	[A/G]	AA	AB	AB	BB	AB	AA	BB	AB
be_A_G_chr16_8073394	16	8073394	BOT	[T/C]	AA	AB	AA	AA	AB	AA	AA	AA
be_A_G_chr17_734445	17	734445	TOP	[A/G]	AA	AB	AA	AA	AA	AA	AA	AA
be_A_G_chr18_2680754	18	2680754	BOT	[T/C]	AA	AA	AA	AA	AB	AA	AA	AA
be_A_G_chr18_4134884	18	4134884	TOP	[A/G]	NC	AA	AA	AA	NC	AA	AA	AA
be_A_G_chr18_742630	18	742630	TOP	[A/G]	BB	BB	BB	BB	AA	BB	BB	BB
be_A_G_chr19_6114586	19	6114586	TOP	[A/G]	BB	BB	BB	BB	AB	BB	BB	BB
be_A_G_chr4_18115492	4	18115492	TOP	[A/G]	AA	AA	NC	AA	AA	AA	AA	AA
be_A_G_chr4_21473261	4	21473261	BOT	[T/C]	BB	AB	AB	AB	BB	AB	BB	AA
be_A_G_chr4_3122198	4	3122198	BOT	[T/C]	AA	AA	AA	AA	AA	AA	NC	AA
be_A_G_chr5_16679887	5	16679887	TOP	[A/G]	AA	AA	AA	AA	AB	AA	AA	AA
be_A_G_chr5_22099693	5	22099693	TOP	[A/G]	AA	AA	AA	AA	AB	AA	AA	AA
be_A_G_chrUn_16619929	UN	16619929	BOT	[T/C]	AA	AA	AA	AA	NC	AA	AA	AA
be_A_G_chrUn_21176554	UN	21176554	TOP	[A/G]	AA	AA	AA	AA	BB	AA	AA	AA
be_A_G_chrUn_39578924	UN	39578924	TOP	[A/G]	AA	AA	AA	AB	AB	AA	AB	AA
be_A_G_chrUn_41399816	UN	41399816	BOT	[T/C]	AA	AA	AA	AA	BB	AB	AA	AB
be_C_A_chr12_8011946	12	8011946	BOT	[T/G]	BB	BB	BB	BB	AB	BB	AB	BB
be_C_A_chr18_random_4851955	18_RANDOM	4851955	TOP	[A/C]	BB	AB	AB	AB	AB	BB	AB	BB
be_C_A_chr19_17407523	19	17407523	TOP	[A/C]	BB	AB	AB	BB	BB	BB	BB	BB
be_C_A_chr19_718723	19	718723	TOP	[A/C]	AB	BB	BB	BB	AB	AB	AB	BB
be_C_A_chr3_5463929	3	5463929	TOP	[A/C]	AB	AB	AB	AB	BB	BB	AB	AB
be_C_A_chr3_6932339	3	6932339	BOT	[T/G]	AB	AB	AB	BB	BB	BB	BB	BB
be_C_A_chr4_14225066	4	14225066	TOP	[A/C]	BB	BB	BB	AB	BB	BB	AB	BB
be_C_A_chr5_5066374	5	5066374	TOP	[A/C]	AB	BB	AB	AB	AB	AB	AB	BB
be_C_A_chr5_5568555	5	5568555	BOT	[T/G]	BB	BB	BB	BB	AA	BB	BB	BB
be_C_A_chr7_3687416	7	3687416	BOT	[T/G]	BB	BB	BB	BB	AA	BB	BB	BB
be_C_A_chr9_11557665	9	11557665	TOP	[A/C]	BB	BB	BB	BB	AB	BB	BB	BB
be_C_T_chr1_1236598	1	1236598	TOP	[A/G]	AB	AB	AB	BB	BB	AB	BB	BB
be_C_T_chr1_6124236	1	6124236	TOP	[A/G]	BB	BB	BB	BB	AB	AB	BB	BB
be_C_T_chr11_18468240	11	18468240	TOP	[A/G]	BB	BB	BB	BB	AB	BB	BB	BB
be_C_T_chr11_18992381	11	18992381	TOP	[A/G]	BB	BB	BB	BB	AB	BB	BB	BB
be_C_T_chr11_random_95437	11_RANDOM	95437	TOP	[A/G]	NC	BB	BB	BB	BB	BB	BB	BB
be_C_T_chr12_21422874	12	21422874	BOT	[T/C]	BB	NC	NC	NC	NC	BB	BB	BB
be_C_T_chr12_2170965	12	2170965	BOT	[T/C]	BB	BB	BB	BB	AB	BB	BB	BB
be_C_T_chr12_5066593	12	5066593	TOP	[A/G]	BB	AB	BB	BB	AB	BB	BB	BB
be_C_T_chr13_13872173	13	13872173	BOT	[T/C]	BB	BB	BB	BB	NC	BB	BB	BB
be_C_T_chr13_23652619	13	23652619	BOT	[T/C]	NC	BB	BB	BB	BB	BB	BB	BB
be_C_T_chr13_5106038	13	5106038	BOT	[T/C]	BB	AB	BB	BB	AB	BB	BB	BB
be_C_T_chr13_7054420	13	7054420	BOT	[T/C]	BB	BB	BB	BB	NC	BB	BB	BB
be_C_T_chr13_7536864	13	7536864	BOT	[T/C]	AB	BB	BB	BB	AA	AB	AB	BB
be_C_T_chr13_8997672	13	8997672	BOT	[T/C]	NC	BB	BB	BB	BB	NC	BB	NC
be_C_T_chr13_random_2095320	13_RANDOM	2095320	TOP	[A/G]	BB	BB	BB	NC	NC	BB	BB	BB
be_C_T_chr13_random_251663	13_RANDOM	251663	BOT	[T/C]	BB	BB	BB	BB	AA	BB	BB	BB
be_C_T_chr13_random_2926864	13_RANDOM	2926864	BOT	[T/C]	BB	AB	AB	BB	AB	BB	BB	BB
be_C_T_chr14_13852396	14	13852396	BOT	[T/C]	AB	AA	AB	BB	BB	AA	AA	AA
be_C_T_chr14_23713784	14	23713784	TOP	[A/G]	AB	AB	BB	AB	BB	AB	AB	AB
be_C_T_chr14_9034142	14	9034142	TOP	[A/G]	NC	BB	BB	BB	BB	NC	BB	BB
be_C_T_chr15_11974543	15	11974543	BOT	[T/C]	BB	BB	BB	BB	AB	BB	BB	BB
be_C_T_chr15_13024367	15	13024367	BOT	[T/C]	AB	BB	BB	BB	BB	AB	BB	BB
be_C_T_chr15_14481330	15	14481330	TOP	[A/G]	AB	AB	BB	BB	AB	BB	AB	BB
be_C_T_chr15_17444663	15	17444663	TOP	[A/G]	BB	BB	BB	BB	AB	BB	BB	BB
be_C_T_chr15_2191500	15	2191500	TOP	[A/G]	BB	BB	BB	BB	AB	BB	BB	BB
be_C_T_chr15_2712436	15	2712436	BOT	[T/C]	BB	BB	BB	BB	AB	BB	BB	BB
be_C_T_chr15_3216538	15	3216538	BOT	[T/C]	BB	BB	BB	BB	AB	BB	BB	BB
be_C_T_chr15_4614857	15	4614857	BOT	[T/C]	BB	NC	BB	BB	BB	BB	BB	BB
be_C_T_chr16_12474677	16	12474677	TOP	[A/G]	BB	BB	BB	AB	BB	BB	BB	AB
be_C_T_chr16_2211846	16	2211846	TOP	[A/G]	AA	AA	AB	AB	AA	AB	AB	BB
be_C_T_chr16_2715151	16	2715151	TOP	[A/G]	BB	BB	BB	BB	AB	BB	AB	BB
be_C_T_chr17_14885464	17	14885464	BOT	[T/C]	BB	BB	BB	BB	AB	BB	BB	BB
be_C_T_chr18_10967519	18	10967519	BOT	[T/C]	BB	BB	BB	BB	AB	BB	BB	BB
be_C_T_chr18_1249477	18	1249477	TOP	[A/G]	AB	BB	BB	BB	AB	AB	BB	BB
be_C_T_chr18_13425462	18	13425462	TOP	[A/G]	BB	BB	BB	BB	AB	BB	BB	BB
be_C_T_chr18_24679023	18	24679023	BOT	[T/C]	AB	AB	BB	BB	AB	AB	BB	BB
be_C_T_chr18_25646557	18	25646557	BOT	[T/C]	BB	BB	BB	BB	AB	BB	BB	BB
be_C_T_chr19_18858496	19	18858496	TOP	[A/G]	BB	NC	BB	BB	BB	BB	BB	BB
be_C_T_chr19_21338053	19	21338053	TOP	[A/G]	BB	BB	BB	BB	AB	BB	BB	BB
be_C_T_chr2_2720067	2	2720067	TOP	[A/G]	BB	BB	BB	BB	AB	BB	BB	BB
be_C_T_chr2_3738448	2	3738448	BOT	[T/C]	BB	AB	AA	AB	BB	BB	AB	AB
be_C_T_chr2_5188365	2	5188365	TOP	[A/G]	BB	BB	BB	BB	AB	BB	BB	BB
be_C_T_chr2_6189454	2	6189454	BOT	[T/C]	BB	AB	BB	BB	BB	BB	BB	AB
be_C_T_chr3_18933467	3	18933467	BOT	[T/C]	BB	AB	BB	BB	BB	BB	BB	BB
be_C_T_chr4_17637966	4	17637966	TOP	[A/G]	BB	BB	BB	AB	BB	AB	AB	AB
be_C_T_chr4_18600968	4	18600968	TOP	[A/G]	BB	BB	BB	BB	AB	BB	AB	BB
be_C_T_chr4_6993124	4	6993124	TOP	[A/G]	AA	BB	BB	NC	BB	AA	BB	AA
be_C_T_chr5_10489883	5	10489883	BOT	[T/C]	BB	BB	BB	AB	AB	BB	BB	BB
be_C_T_chr5_19649349	5	19649349	TOP	[A/G]	BB	BB	BB	BB	AB	BB	BB	BB
be_C_T_chr5_24013162	5	24013162	BOT	[T/C]	BB	BB	BB	BB	AB	BB	BB	BB
be_C_T_chr5_4116949	5	4116949	BOT	[T/C]	BB	BB	BB	BB	AB	BB	BB	BB
be_C_T_chr5_8021993	5	8021993	BOT	[T/C]	BB	BB	BB	BB	AB	BB	BB	BB
be_C_T_chr5_9040383	5	9040383	BOT	[T/C]	BB	BB	BB	BB	AA	BB	BB	BB
be_C_T_chr7_1719171	7	1719171	BOT	[T/C]	BB	BB	BB	BB	AB	BB	BB	BB
be_C_T_chr8_17242546	8	17242546	BOT	[T/C]	AA	BB	AB	AB	AB	AB	AA	BB
be_C_T_chr9_12364075	9	12364075	BOT	[T/C]	BB	BB	BB	BB	AB	BB	BB	BB
be_C_T_chr9_13958919	9	13958919	BOT	[T/C]	BB	BB	BB	BB	AB	BB	BB	BB
be_C_T_chr9_2211032	9	2211032	BOT	[T/C]	BB	AB	BB	AB	BB	BB	BB	BB
be_C_T_chrUn_18204717	UN	18204717	BOT	[T/C]	BB	BB	BB	BB	AB	BB	BB	BB
be_C_T_chrUn_20868030	UN	20868030	TOP	[A/G]	BB	BB	BB	BB	AB	BB	BB	BB
be_C_T_chrUn_35548674	UN	35548674	BOT	[T/C]	AB	BB	BB	BB	BB	AA	AB	AB
be_C_T_chrUn_36105587	UN	36105587	BOT	[T/C]	AB	AB	AB	BB	AB	BB	BB	AB
be_C_T_chrUn_38068310	UN	38068310	TOP	[A/G]	AB	BB	BB	BB	AB	AB	AB	BB
be_C_T_chrUn_4872157	UN	4872157	BOT	[T/C]	BB	AB	BB	BB	AB	BB	BB	BB
be_G_A_chr1_2693043	1	2693043	BOT	[T/C]	BB	BB	BB	BB	AB	BB	BB	BB
be_G_A_chr1_4644161	1	4644161	TOP	[A/G]	BB	AB	AB	AB	BB	BB	AB	AB
be_G_A_chr10_718334	10	718334	TOP	[A/G]	BB	BB	BB	BB	AB	BB	BB	BB
be_G_A_chr10_7587438	10	7587438	BOT	[T/C]	BB	BB	BB	BB	AB	BB	BB	BB
be_G_A_chr12_14704489	12	14704489	TOP	[A/G]	NC	BB	BB	BB	AA	BB	BB	BB
be_G_A_chr12_4594784	12	4594784	TOP	[A/G]	AA	AA	AB	BB	AB	AA	AB	AB
be_G_A_chr12_8889344	12	8889344	TOP	[A/G]	AB	AB	BB	AB	AB	AB	BB	BB
be_G_A_chr12_9396440	12	9396440	BOT	[T/C]	BB	BB	BB	BB	AB	BB	BB	BB
be_G_A_chr13_11499175	13	11499175	TOP	[A/G]	BB	BB	BB	BB	AB	BB	BB	BB
be_G_A_chr13_15843798	13	15843798	TOP	[A/G]	BB	AB	BB	BB	BB	BB	BB	BB
be_G_A_chr13_17684612	13	17684612	BOT	[T/C]	NC	BB	BB	NC	AB	BB	BB	BB
be_G_A_chr13_19706352	13	19706352	TOP	[A/G]	BB	BB	BB	BB	AA	BB	BB	BB
be_G_A_chr13_22547973	13	22547973	BOT	[T/C]	BB	BB	BB	BB	NC	BB	BB	BB
be_G_A_chr13_4623564	13	4623564	TOP	[A/G]	AB	AA	AB	BB	AB	BB	AA	BB
be_G_A_chr14_15374365	14	15374365	BOT	[T/C]	BB	BB	BB	BB	AB	BB	BB	BB
be_G_A_chr14_25732284	14	25732284	BOT	[T/C]	AB	BB	BB	BB	BB	BB	BB	BB
be_G_A_chr14_26602245	14	26602245	TOP	[A/G]	BB	BB	BB	BB	AB	BB	BB	BB
be_G_A_chr15_11551852	15	11551852	TOP	[A/G]	BB	BB	BB	BB	AB	BB	BB	BB
be_G_A_chr15_17882024	15	17882024	TOP	[A/G]	AA	AA	AA	AA	AB	AA	AB	AA
be_G_A_chr16_18825458	16	18825458	TOP	[A/G]	BB	BB	BB	AB	BB	BB	BB	BB
be_G_A_chr16_random_527707	16_RANDOM	527707	TOP	[A/G]	BB	BB	BB	BB	AB	BB	BB	BB
be_G_A_chr17_2684678	17	2684678	TOP	[A/G]	AB	BB	BB	BB	AB	AB	BB	AB
be_G_A_chr18_19222989	18	19222989	BOT	[T/C]	BB	BB	NC	BB	BB	BB	BB	BB
be_G_A_chr18_28569326	18	28569326	TOP	[A/G]	BB	BB	BB	BB	AB	BB	BB	BB
be_G_A_chr19_12049974	19	12049974	BOT	[T/C]	BB	AB	AB	BB	BB	BB	NC	BB
be_G_A_chr19_21818628	19	21818628	TOP	[A/G]	BB	BB	BB	BB	BB	BB	AB	BB
be_G_A_chr19_3178747	19	3178747	TOP	[A/G]	BB	BB	BB	BB	AB	NC	NC	BB
be_G_A_chr3_15086488	3	15086488	TOP	[A/G]	BB	BB	AB	AB	BB	AB	AB	AB
be_G_A_chr3_random_256358	3_RANDOM	256358	TOP	[A/G]	AB	BB	AB	AB	BB	AA	AB	AA
be_G_A_chr4_3603872	4	3603872	TOP	[A/G]	AA	BB	BB	AB	BB	AB	AB	AB
be_G_A_chr4_623358	4	623358	TOP	[A/G]	AB	BB	BB	BB	AB	BB	AB	BB
be_G_A_chr5_23001675	5	23001675	TOP	[A/G]	BB	AB	AB	BB	BB	BB	BB	BB
be_G_A_chr5_6579770	5	6579770	BOT	[T/C]	BB	BB	BB	BB	AB	BB	BB	BB
be_G_A_chr5_9929083	5	9929083	TOP	[A/G]	BB	BB	BB	BB	BB	BB	AB	BB
be_G_A_chr6_13419840	6	13419840	BOT	[T/C]	NC	AB	NC	NC	AA	NC	NC	AB
be_G_A_chr7_263174	7	263174	BOT	[T/C]	BB	BB	BB	BB	NC	BB	BB	BB
be_G_A_chr7_7587325	7	7587325	TOP	[A/G]	AB	BB	BB	BB	BB	AB	BB	BB
be_G_A_chr7_random_653806	7_RANDOM	653806	BOT	[T/C]	BB	BB	BB	BB	NC	BB	BB	BB
be_G_A_chr8_10431638	8	10431638	TOP	[A/G]	AA	AB	AB	AA	AA	AB	AB	AB
be_G_A_chr9_20811156	9	20811156	TOP	[A/G]	AB	BB	BB	AB	BB	AB	BB	BB
be_G_A_chr9_21710583	9	21710583	BOT	[T/C]	BB	AB	AB	BB	AB	BB	BB	BB
be_G_A_chrUn_1283114	UN	1283114	BOT	[T/C]	BB	BB	BB	BB	BB	BB	BB	BB
be_G_A_chrUn_15094339	UN	15094339	BOT	[T/C]	BB	BB	BB	BB	AA	BB	BB	BB
be_G_A_chrUn_18660444	UN	18660444	TOP	[A/G]	BB	BB	BB	BB	AA	BB	BB	BB
be_G_T_chr10_12018956	10	12018956	TOP	[A/C]	BB	NC	NC	BB	BB	BB	BB	BB
be_G_T_chr11_8876451	11	8876451	TOP	[A/C]	BB	NC	NC	NC	NC	BB	BB	BB
be_G_T_chr13_9428611	13	9428611	TOP	[A/C]	BB	BB	BB	BB	AA	BB	BB	BB
be_G_T_chr15_10474809	15	10474809	TOP	[A/C]	BB	BB	BB	BB	NC	BB	BB	BB
be_G_T_chr17_13473573	17	13473573	BOT	[T/G]	BB	BB	BB	BB	AB	BB	BB	BB
be_G_T_chr4_2187411	4	2187411	BOT	[T/G]	BB	BB	BB	BB	BB	BB	NC	BB
be_G_T_chr5_24532383	5	24532383	TOP	[A/C]	AB	AB	AA	AA	AA	AB	AB	AA
be_G_T_chr8_8512750	8	8512750	TOP	[A/C]	AB	AB	BB	BB	BB	AB	AB	AB
be_T_C_chr1_16502631	1	16502631	TOP	[A/G]	NC	AA	AA	AA	AA	AA	AA	AA
be_T_C_chr11_18012075	11	18012075	TOP	[A/G]	BB	BB	BB	BB	BB	BB	AB	BB
be_T_C_chr12_10329505	12	10329505	BOT	[T/C]	AA	AA	AA	AA	AB	AA	AA	AA
be_T_C_chr12_11860915	12	11860915	TOP	[A/G]	AA	AA	AA	AA	AA	NC	AA	AA
be_T_C_chr12_19506516	12	19506516	BOT	[T/C]	AA	AA	AA	AA	AB	AA	AA	AA
be_T_C_chr13_14826105	13	14826105	BOT	[T/C]	AA	AA	AA	AA	NC	AA	AA	AA
be_T_C_chr13_16289730	13	16289730	BOT	[T/C]	AA	AA	AA	AA	AB	AA	AA	AA
be_T_C_chr13_random_2442030	13_RANDOM	2442030	BOT	[T/C]	AA	AA	AA	AA	AB	AA	AA	AA
be_T_C_chr15_15965169	15	15965169	TOP	[A/G]	AA	AB	BB	AB	AA	AA	AA	AB
be_T_C_chr15_701609	15	701609	TOP	[A/G]	AA	NC	AA	AA	AA	AA	AA	AA
be_T_C_chr16_6117007	16	6117007	BOT	[T/C]	AB	AA	AA	AA	BB	AA	AA	AA
be_T_C_chr18_28099335	18	28099335	TOP	[A/G]	AA	AA	AA	AA	AB	AA	AA	AA
be_T_C_chr18_3680774	18	3680774	BOT	[T/C]	AA	AA	AA	AA	AA	AA	NC	AA
be_T_C_chr18_random_2803874	18_RANDOM	2803874	BOT	[T/C]	AA	AA	AA	AA	AB	AA	AA	AA
be_T_C_chr19_18381649	19	18381649	TOP	[A/G]	AA	AA	AA	AA	AB	AA	AA	AA
be_T_C_chr2_1227207	2	1227207	TOP	[A/G]	AA	AA	AA	AA	BB	AA	AA	AB
be_T_C_chr3_8876215	3	8876215	BOT	[T/C]	AA	AA	AA	AA	AB	AA	AA	AA
be_T_C_chr4_19136673	4	19136673	TOP	[A/G]	AA	AA	NC	AA	AA	AA	AA	AA
be_T_C_chr4_7529012	4	7529012	TOP	[A/G]	AB	BB	BB	AB	BB	BB	AB	AB
be_T_C_chr5_7062255	5	7062255	TOP	[A/G]	AA	AA	AA	AA	AA	AA	NC	AA
be_T_C_chr7_10534431	7	10534431	BOT	[T/C]	AA	AA	AA	AA	AB	AA	AA	AA
be_T_C_chr8_18696002	8	18696002	BOT	[T/C]	NC	AA	AA	AA	AA	NC	NC	AA
be_T_C_chr9_16821808	9	16821808	TOP	[A/G]	AA	AA	AA	AA	AB	AA	AA	AA
be_T_C_chr9_6085401	9	6085401	BOT	[T/C]	NC	BB	BB	BB	AB	AB	AB	BB
be_T_C_chr9_7572193	9	7572193	TOP	[A/G]	AB	BB	BB	BB	AB	BB	BB	BB
be_T_C_chr9_8884180	9	8884180	TOP	[A/G]	AB	AB	AB	AB	AB	AB	AA	AB
be_T_C_chrUn_8844841	UN	8844841	TOP	[A/G]	AA	AB	AA	AB	AA	AB	AB	BB
be_T_C_chrUn_9472396	UN	9472396	BOT	[T/C]	AA	AA	AA	AA	AB	AA	AA	AA
be_T_G_chr10_12964305	10	12964305	BOT	[T/G]	AA	AB	AB	AB	AB	AB	AB	AB
be_T_G_chr14_7136442	14	7136442	BOT	[T/G]	BB	BB	AB	AB	AA	BB	BB	AA
be_T_G_chr16_1229416	16	1229416	TOP	[A/C]	BB	BB	AB	AB	BB	BB	BB	AB
be_T_G_chr19_17882396	19	17882396	BOT	[T/G]	AA	AA	AA	AA	AA	AA	AA	NC
be_T_G_chr19_3675092	19	3675092	TOP	[A/C]	AB	AA	AA	AA	AA	AA	AA	AA
be_T_G_chr3_12208763	3	12208763	BOT	[T/G]	AA	AA	AA	AA	AB	AA	AA	AA
be_T_G_chr7_19771590	7	19771590	TOP	[A/C]	AA	AA	AA	AA	AB	AA	AA	AA
chr1_10027559_G_T	1	10027559	TOP	[A/C]	BB	AB	AB	BB	AB	BB	BB	AB
chr1_10028695_G_T	1	10028695	TOP	[A/C]	AA	AB	AB	AA	AA	AA	AA	AB
chr1_10048792_C_T	1	10048792	BOT	[T/C]	AA	AB	AA	NC	BB	AB	BB	AA
chr1_10064124_A_G	1	10064124	BOT	[T/C]	AA	AB	AA	AA	AB	AB	AA	AA
chr1_10103455_C_T	1	10103455	TOP	[A/G]	BB	AB	BB	BB	AB	AB	BB	AB
chr1_10136235_A_G	1	10136235	TOP	[A/G]	AB	AA	AB	BB	AA	AA	AB	AA
chr1_10215474_A_G	1	10215474	TOP	[A/G]	BB	AB	AB	BB	BB	BB	BB	AA
chr1_10248041_A_G	1	10248041	TOP	[A/G]	AB	AA	AB	BB	AA	AA	AB	AB
chr1_10279151_A_G	1	10279151	TOP	[A/G]	AB	AB	AB	BB	AB	AB	AB	AA
chr1_10306186_C_T	1	10306186	BOT	[T/C]	AA	AA	AA	AA	AA	AA	AB	AB
chr1_10346685_G_T	1	10346685	BOT	[T/G]	AB	BB	BB	BB	BB	AB	BB	BB
chr1_10348071_C_T	1	10348071	BOT	[T/C]	AB	BB	BB	BB	AB	AB	BB	BB
chr1_10384689_A_G	1	10384689	BOT	[T/C]	AB	AB	AB	BB	AB	AB	AB	AA
chr1_10422513_C_T	1	10422513	TOP	[A/G]	AB	AB	BB	BB	AA	AA	BB	BB
chr1_10492345_A_G	1	10492345	TOP	[A/G]	AB	AA	AA	AA	AA	AB	AA	AA
chr1_1054717_C_T	1	1054717	TOP	[A/G]	BB	BB	AB	AB	BB	BB	BB	BB
chr1_10567353_C_T	1	10567353	TOP	[A/G]	AB	BB	BB	AB	AB	BB	AB	BB
chr1_10601560_C_T	1	10601560	TOP	[A/G]	AB	AA	AA	AB	AA	AA	AB	AA
chr1_10636113_A_G	1	10636113	BOT	[T/C]	BB	BB	BB	BB	BB	BB	AB	AB
chr1_10645223_A_C	1	10645223	BOT	[T/G]	AB	BB	BB	AB	BB	BB	AB	AB
chr1_10650149_G_T	1	10650149	TOP	[A/C]	AA	AA	AA	AA	AA	AA	AB	AA
chr1_10686955_C_T	1	10686955	TOP	[A/G]	AB	BB	BB	AB	AB	BB	AB	AB
chr1_10707573_A_G	1	10707573	BOT	[T/C]	BB	AB	AA	NC	AB	BB	AA	AA
chr1_10751301_A_C	1	10751301	BOT	[T/G]	AB	BB	BB	AB	BB	BB	AB	AB
chr1_10778771_A_G	1	10778771	TOP	[A/G]	AB	BB	BB	AB	BB	BB	AB	AB
chr1_10815671_A_G	1	10815671	BOT	[T/C]	AB	BB	BB	BB	BB	AB	BB	BB
chr1_10822572_A_G	1	10822572	TOP	[A/G]	AA	BB	AA	AA	NC	NC	AA	AA
chr1_10848183_C_T	1	10848183	TOP	[A/G]	AB	BB	BB	AB	BB	BB	AA	AB
chr1_1087116_A_G	1	1087116	BOT	[T/C]	BB	BB	BB	BB	AA	BB	AB	BB
chr1_10879621_G_T	1	10879621	TOP	[A/C]	AB	BB	BB	AB	BB	BB	AB	BB
chr1_10913571_C_T	1	10913571	TOP	[A/G]	AB	AA	AB	AB	AA	AB	AA	AA
chr1_10976077_G_T	1	10976077	TOP	[A/C]	AB	AB	AB	AB	AA	AA	AB	AB
chr1_11010707_G_T	1	11010707	BOT	[T/G]	AB	AA	AA	AB	AA	AA	AB	AA
chr1_11027925_C_T	1	11027925	TOP	[A/G]	AB	AA	AA	AB	AA	AA	AB	AA
chr1_11183949_C_T	1	11183949	BOT	[T/C]	BB	BB	BB	BB	AB	BB	BB	AB
chr1_11198094_A_G	1	11198094	BOT	[T/C]	BB	AB	AB	AB	AB	AB	AB	AB
chr1_11207220_A_G	1	11207220	BOT	[T/C]	BB	AA	AA	AB	AB	AB	NC	AA
chr1_11240032_A_G	1	11240032	BOT	[T/C]	BB	AA	AA	AB	AA	AB	BB	AA
chr1_11313468_C_T	1	11313468	TOP	[A/G]	BB	AB	AB	AB	AB	AB	BB	AB
chr1_11333731_C_T	1	11333731	TOP	[A/G]	AB	BB	BB	AB	BB	BB	AA	BB
chr1_11414632_C_T	1	11414632	TOP	[A/G]	BB	BB	BB	BB	AB	BB	BB	BB
chr1_11428082_C_T	1	11428082	TOP	[A/G]	BB	BB	AB	AB	BB	BB	BB	BB
chr1_11457396_C_T	1	11457396	TOP	[A/G]	BB	BB	AB	AB	AB	BB	BB	BB
chr1_11488239_A_G	1	11488239	TOP	[A/G]	AA	BB	BB	BB	BB	BB	BB	AB
chr1_11527964_A_G	1	11527964	TOP	[A/G]	AB	AB	AB	AA	AA	AA	AA	AB
chr1_11600448_A_G	1	11600448	TOP	[A/G]	AA	AA	AA	AB	AA	AA	BB	AA
chr1_11622136_A_G	1	11622136	BOT	[T/C]	AB	AA	AA	AA	NC	AB	AA	AB
chr1_1163551_A_G	1	1163551	BOT	[T/C]	AA	AA	AA	AB	AB	AB	AA	AB
chr1_1164056_G_T	1	1164056	TOP	[A/C]	BB	BB	BB	AB	AB	AB	BB	AB
chr1_11680867_A_G	1	11680867	TOP	[A/G]	AB	AA	AA	AA	AB	AB	AA	AB
chr1_11709592_A_G	1	11709592	TOP	[A/G]	AB	AB	AB	BB	BB	AB	BB	AA
chr1_1173370_G_T	1	1173370	TOP	[A/C]	AA	AA	AA	AA	AB	AA	AA	AA
chr1_11738703_C_T	1	11738703	BOT	[T/C]	AB	BB	BB	BB	BB	AB	BB	AB
chr1_11739249_C_T	1	11739249	BOT	[T/C]	AA	AA	AA	AB	AA	AA	AB	AA
chr1_11818337_C_T	1	11818337	TOP	[A/G]	AB	AA	AA	AA	AA	AB	AA	AB
chr1_11853324_A_G	1	11853324	TOP	[A/G]	AB	AB	AB	BB	AB	AB	BB	AA
chr1_11874008_C_T	1	11874008	BOT	[T/C]	AB	AB	AB	AB	AB	AB	AB	BB
chr1_119067_G_T	1	119067	BOT	[T/G]	AB	AA	AA	AA	AA	BB	AA	AA
chr1_11969030_A_G	1	11969030	TOP	[A/G]	BB	AB	AB	BB	BB	BB	BB	AB
chr1_1198061_A_C	1	1198061	TOP	[A/C]	AA	AB	BB	AB	AA	AA	AB	AA
chr1_11996175_C_T	1	11996175	BOT	[T/C]	BB	AB	AB	BB	BB	BB	BB	AB
chr1_12012741_C_T	1	12012741	TOP	[A/G]	AB	AA	AA	AA	AA	AA	AA	AA
chr1_12046683_A_G	1	12046683	TOP	[A/G]	BB	BB	BB	AB	BB	BB	AB	BB
chr1_12056309_C_T	1	12056309	BOT	[T/C]	AA	AA	AA	AB	AB	AA	BB	AA
chr1_12092270_C_T	1	12092270	BOT	[T/C]	AA	BB	BB	BB	BB	AB	BB	AB
chr1_12168156_C_T	1	12168156	BOT	[T/C]	AB	AB	AA	AB	BB	AB	AB	AA
chr1_12212304_C_T	1	12212304	BOT	[T/C]	AB	BB	BB	AB	AB	BB	AB	BB
chr1_12214564_A_G	1	12214564	BOT	[T/C]	AA	AB	AB	AB	AB	AB	AB	AA
chr1_1222768_G_T	1	1222768	TOP	[A/C]	AA	AA	AA	AA	AA	AA	AB	AB
chr1_12241211_A_G	1	12241211	TOP	[A/G]	BB	BB	BB	BB	AB	BB	AB	BB
chr1_12284201_G_T	1	12284201	TOP	[A/C]	BB	BB	BB	BB	AB	BB	BB	BB
chr1_12352034_C_T	1	12352034	TOP	[A/G]	BB	BB	BB	BB	BB	BB	AB	BB
chr1_12361877_A_G	1	12361877	BOT	[T/C]	AA	AA	AB	AB	BB	AA	AA	AA
chr1_12389474_A_C	1	12389474	BOT	[T/G]	BB	BB	BB	BB	AB	BB	BB	BB
chr1_12552777_A_G	1	12552777	BOT	[T/C]	AA	AA	AA	AB	AA	AA	AB	AA
chr1_12560573_A_G	1	12560573	BOT	[T/C]	AB	AB	AB	AA	AB	AB	AB	BB
chr1_12603724_A_G	1	12603724	TOP	[A/G]	AB	AA	AA	AB	AB	AA	AB	AA
chr1_1261165_A_C	1	1261165	BOT	[T/G]	BB	BB	BB	AB	BB	BB	BB	BB
chr1_12668414_A_G	1	12668414	TOP	[A/G]	BB	AB	AB	AB	NC	AB	AB	AB
chr1_1302400_C_T	1	1302400	BOT	[T/C]	AA	AB	AB	AA	AA	AA	AA	AA
chr1_1304398_C_T	1	1304398	BOT	[T/C]	AA	AB	AB	AB	AA	AA	AB	AA
chr1_1336961_G_T	1	1336961	TOP	[A/C]	BB	AB	AB	BB	AB	BB	AB	BB
chr1_13669728_C_T	1	13669728	BOT	[T/C]	AB	AB	BB	BB	BB	AB	BB	AB
chr1_13676388_C_T	1	13676388	BOT	[T/C]	AA	AA	AA	AB	AA	AA	AB	AA
chr1_13680311_A_G	1	13680311	TOP	[A/G]	AA	AA	AB	AB	AB	AA	AA	AA
chr1_1372222_C_T	1	1372222	BOT	[T/C]	AB	AB	AA	AA	AB	AA	AB	AB
chr1_13836783_C_T	1	13836783	TOP	[A/G]	AB	AB	BB	AB	BB	AB	AB	AB
chr1_13920137_A_G	1	13920137	BOT	[T/C]	AB	AB	AA	AB	AA	AB	AB	AB
chr1_13921759_G_T	1	13921759	BOT	[T/G]	BB	BB	AB	AB	AB	BB	BB	BB
chr1_13989145_A_C	1	13989145	TOP	[A/C]	AB	AB	AA	AB	AB	AB	AB	AA
chr1_14006648_C_T	1	14006648	BOT	[T/C]	AB	AB	AB	BB	BB	AB	AB	AA
chr1_1403770_C_T	1	1403770	BOT	[T/C]	AB	AB	AB	BB	BB	AB	AB	BB
chr1_14163808_C_T	1	14163808	TOP	[A/G]	AB	AB	AB	AA	AB	AB	AA	AB
chr1_14215925_A_G	1	14215925	BOT	[T/C]	AA	AA	AA	AA	AA	AA	AA	AB
chr1_14217751_G_T	1	14217751	BOT	[T/G]	BB	AB	BB	BB	BB	AB	BB	BB
chr1_14232730_C_T	1	14232730	BOT	[T/C]	AA	AA	AA	AB	AB	AA	BB	AA
chr1_14302982_C_T	1	14302982	BOT	[T/C]	AB	AB	AB	BB	AB	AB	BB	AB
chr1_14309754_A_C	1	14309754	BOT	[T/G]	BB	AB	BB	BB	BB	AB	BB	BB
chr1_14575102_C_T	1	14575102	TOP	[A/G]	AA	AA	AB	AB	BB	AA	AA	AA
chr1_14581112_A_G	1	14581112	BOT	[T/C]	AA	AA	AB	AB	BB	AA	AB	AA
chr1_1458632_A_G	1	1458632	TOP	[A/G]	BB	BB	BB	BB	BB	BB	BB	AB
chr1_14624429_C_T	1	14624429	BOT	[T/C]	AA	AA	AA	AB	AA	AA	AB	AA
chr1_14627879_A_G	1	14627879	BOT	[T/C]	AB	AB	AB	AB	AA	AB	AB	BB
chr1_14667660_C_T	1	14667660	BOT	[T/C]	AB	AA	AA	AA	AA	AA	AA	AA
chr1_14668769_C_T	1	14668769	TOP	[A/G]	AB	AB	AB	AB	AA	AB	AB	BB
chr1_14806053_A_G	1	14806053	BOT	[T/C]	AB	AB	AB	AB	BB	AB	AB	AB
chr1_1482338_G_T	1	1482338	TOP	[A/C]	BB	BB	BB	BB	BB	BB	BB	AB
chr1_1482634_C_T	1	1482634	TOP	[A/G]	AA	AA	AB	AB	AA	AA	AA	AA
chr1_14842859_C_T	1	14842859	TOP	[A/G]	AB	AB	AB	AB	AA	AB	AB	AB
chr1_14860048_A_G	1	14860048	TOP	[A/G]	AA	AA	AA	AA	AA	AA	AA	AB
chr1_14954166_G_T	1	14954166	TOP	[A/C]	AB	AB	AB	AB	AA	AB	BB	AB
chr1_14958139_A_G	1	14958139	TOP	[A/G]	AB	AA	AB	AB	AB	AA	AA	AB
chr1_14983549_A_G	1	14983549	TOP	[A/G]	AA	AB	AA	AA	AA	AB	AA	AA
chr1_15016961_A_G	1	15016961	BOT	[T/C]	AB	AB	AA	AA	AB	AB	AB	AB
chr1_1513844_A_C	1	1513844	BOT	[T/G]	AB	AB	BB	BB	AB	BB	AB	AB
chr1_15601334_A_G	1	15601334	BOT	[T/C]	AA	AA	AA	AA	AB	AA	AA	AA
chr1_1562688_A_C	1	1562688	TOP	[A/C]	BB	BB	BB	AB	BB	BB	BB	BB
chr1_15659319_C_T	1	15659319	TOP	[A/G]	AA	AA	AA	AB	AA	AA	AB	AA
chr1_15702664_A_G	1	15702664	BOT	[T/C]	AB	AB	AB	AB	AB	AB	AB	AA
chr1_15717010_A_C	1	15717010	TOP	[A/C]	AA	AA	AA	AA	AB	AA	AA	AA
chr1_15717071_C_T	1	15717071	TOP	[A/G]	AB	AB	AB	AB	AB	AB	AB	AA
chr1_15761994_A_G	1	15761994	BOT	[T/C]	BB	BB	BB	AB	BB	BB	AA	BB
chr1_15804771_A_G	1	15804771	BOT	[T/C]	AB	AB	AB	AB	AB	AB	AA	AA
chr1_1583561_A_G	1	1583561	TOP	[A/G]	BB	BB	AB	AB	BB	AB	BB	AB
chr1_15843271_A_G	1	15843271	TOP	[A/G]	AB	AB	AB	AB	AA	AB	BB	BB
chr1_15882089_C_T	1	15882089	BOT	[T/C]	AB	AA	AA	AA	AA	AA	NC	AA
chr1_15889332_A_G	1	15889332	TOP	[A/G]	AB	AB	AB	AB	BB	AB	AB	AB
chr1_15909374_C_T	1	15909374	BOT	[T/C]	BB	AB	AB	AB	AA	AB	BB	BB
chr1_15934554_C_T	1	15934554	TOP	[A/G]	AB	AB	AB	AB	AB	AB	AA	AA
chr1_159994_G_T	1	159994	BOT	[T/G]	AA	AB	AB	AA	AB	AA	AA	AA
chr1_1611098_A_C	1	1611098	TOP	[A/C]	AA	AA	AA	AA	AA	AA	AA	AB
chr1_16159075_C_T	1	16159075	BOT	[T/C]	BB	AB	BB	AB	BB	AB	AA	AB
chr1_16197622_A_G	1	16197622	TOP	[A/G]	BB	AB	BB	BB	BB	AB	BB	BB
chr1_16205431_A_C	1	16205431	TOP	[A/C]	AA	AB	AB	AB	AB	AB	AA	AA
chr1_1620902_C_T	1	1620902	BOT	[T/C]	AA	AA	AA	AB	AA	AA	AA	AB
chr1_16242814_C_T	1	16242814	BOT	[T/C]	AB	AA	AA	AA	AA	AA	AA	AA
chr1_16266476_C_T	1	16266476	TOP	[A/G]	BB	BB	BB	BB	BB	BB	BB	AB
chr1_16346395_A_G	1	16346395	BOT	[T/C]	BB	BB	AA	AA	AA	BB	NC	AB
chr1_16376328_C_T	1	16376328	TOP	[A/G]	NC	BB	BB	AB	BB	BB	AA	NC
chr1_16384739_A_G	1	16384739	BOT	[T/C]	AB	AA	AA	AA	AA	AA	AA	AB
chr1_164167_C_T	1	164167	TOP	[A/G]	BB	BB	BB	BB	AA	BB	BB	AB
chr1_16444162_C_T	1	16444162	BOT	[T/C]	AB	AB	AB	BB	BB	AB	BB	AB
chr1_16479147_A_G	1	16479147	BOT	[T/C]	AA	AA	AA	AA	AA	AA	AA	AB
chr1_16491864_A_G	1	16491864	TOP	[A/G]	AB	AA	AA	AA	AA	AA	AB	AA
chr1_16513552_C_T	1	16513552	BOT	[T/C]	BB	BB	BB	AB	BB	BB	AA	BB
chr1_16550466_A_G	1	16550466	BOT	[T/C]	AB	AB	AA	AA	AA	AB	AB	AA
chr1_1655940_C_T	1	1655940	BOT	[T/C]	AA	AA	BB	BB	AB	AB	AB	AB
chr1_16586426_A_C	1	16586426	TOP	[A/C]	AA	AB	AB	BB	AB	AB	AB	AB
chr1_16623814_C_T	1	16623814	BOT	[T/C]	AB	AA	AA	AB	AB	AA	BB	AA
chr1_16694690_G_T	1	16694690	TOP	[A/C]	BB	AB	AB	BB	BB	BB	AB	AB
chr1_16864011_A_G	1	16864011	BOT	[T/C]	AA	BB	BB	AB	BB	AB	AB	BB
chr1_16866207_A_G	1	16866207	TOP	[A/G]	AA	BB	BB	BB	BB	AB	BB	BB
chr1_16904389_C_T	1	16904389	BOT	[T/C]	AB	BB	BB	BB	BB	BB	BB	BB
chr1_16906729_A_C	1	16906729	TOP	[A/C]	AB	BB	AB	AB	AB	BB	BB	AB
chr1_1695157_A_G	1	1695157	BOT	[T/C]	AA	AB	BB	AB	AA	AA	AA	AA
chr1_16967062_A_G	1	16967062	TOP	[A/G]	AA	AA	AB	AB	AB	AA	AB	AB
chr1_16977489_A_G	1	16977489	TOP	[A/G]	AA	AB	AB	AA	AA	AA	AA	AB
chr1_17048242_A_G	1	17048242	TOP	[A/G]	AA	AB	AB	AA	AA	AA	AA	AB
chr1_17139876_A_G	1	17139876	TOP	[A/G]	AB	BB	BB	BB	BB	BB	BB	BB
chr1_17167398_A_G	1	17167398	TOP	[A/G]	BB	BB	BB	AB	BB	BB	AB	BB
chr1_17202271_A_G	1	17202271	TOP	[A/G]	BB	AB	AB	BB	BB	BB	AB	AB
chr1_17217214_A_G	1	17217214	TOP	[A/G]	BB	AB	AB	BB	BB	BB	AB	AB
chr1_17218476_A_G	1	17218476	TOP	[A/G]	BB	BB	BB	AB	BB	BB	AB	BB
chr1_17218655_A_G	1	17218655	BOT	[T/C]	AA	AA	AA	AB	AA	AA	AB	AA
chr1_17373491_A_G	1	17373491	BOT	[T/C]	AB	AA	AA	AA	AA	AB	AA	AA
chr1_17402591_C_T	1	17402591	BOT	[T/C]	AA	AB	AB	AB	AB	AB	AA	AB
chr1_17402882_C_T	1	17402882	BOT	[T/C]	BB	BB	BB	AB	BB	BB	AB	AB
chr1_17451211_A_G	1	17451211	TOP	[A/G]	BB	AB	AB	BB	BB	AB	BB	AB
chr1_17513172_A_G	1	17513172	BOT	[T/C]	AB	AB	AB	BB	BB	AB	BB	AB
chr1_17549134_A_G	1	17549134	TOP	[A/G]	AA	AA	AA	AB	AA	AA	BB	AA
chr1_1761083_A_C	1	1761083	BOT	[T/G]	AA	AA	NC	BB	AB	BB	AA	AB
chr1_1764767_A_G	1	1764767	TOP	[A/G]	AB	AB	AA	AA	AB	AA	AB	AB
chr1_17951118_A_C	1	17951118	TOP	[A/C]	AA	AA	AA	AB	AB	AA	BB	AA
chr1_18013177_C_T	1	18013177	TOP	[A/G]	AB	AA	AA	AA	AA	AA	AA	AA
chr1_18021871_A_G	1	18021871	TOP	[A/G]	BB	AB	AB	BB	AB	BB	BB	AB
chr1_18105883_C_T	1	18105883	TOP	[A/G]	AB	BB	BB	BB	BB	AB	BB	BB
chr1_1813511_A_G	1	1813511	BOT	[T/C]	AA	AB	AB	AA	AA	AA	AA	AA
chr1_18157904_A_G	1	18157904	BOT	[T/C]	BB	AA	AA	AB	AA	AB	AA	AA
chr1_18181446_C_T	1	18181446	BOT	[T/C]	AB	BB	BB	AB	BB	BB	AA	BB
chr1_18321760_C_T	1	18321760	TOP	[A/G]	BB	AB	AB	AB	AB	AB	BB	BB
chr1_1836149_A_G	1	1836149	TOP	[A/G]	AB	AB	AA	AA	BB	AA	AB	BB
chr1_18368208_C_T	1	18368208	BOT	[T/C]	AB	AA	AA	AB	AA	AA	AB	AA
chr1_18404031_A_G	1	18404031	TOP	[A/G]	AA	AB	AB	AB	BB	AB	AB	AB
chr1_18464186_A_G	1	18464186	TOP	[A/G]	AB	AA	AA	AB	AA	AB	AB	AA
chr1_18577173_C_T	1	18577173	BOT	[T/C]	AB	BB	BB	BB	BB	AB	BB	BB
chr1_18582851_C_T	1	18582851	BOT	[T/C]	BB	BB	BB	BB	BB	BB	BB	AB
chr1_18651435_C_T	1	18651435	BOT	[T/C]	AA	BB	BB	AB	AB	AB	AB	AB
chr1_1870587_C_T	1	1870587	TOP	[A/G]	AA	AA	AA	AA	AA	AA	AA	AB
chr1_18760209_A_G	1	18760209	TOP	[A/G]	BB	AA	AA	AB	AB	AB	BB	AB
chr1_18902730_A_G	1	18902730	BOT	[T/C]	AA	AB	AB	AA	AB	AA	AA	AB
chr1_18906357_A_G	1	18906357	BOT	[T/C]	AA	AB	AB	AA	AB	AA	AA	AB
chr1_18973092_A_C	1	18973092	BOT	[T/G]	BB	AB	AB	BB	AB	BB	BB	AB
chr1_19009322_A_G	1	19009322	TOP	[A/G]	AA	AA	AA	AA	AB	AA	AA	AA
chr1_19045364_G_T	1	19045364	BOT	[T/G]	BB	AB	AB	BB	AB	BB	BB	AB
chr1_1906912_A_C	1	1906912	BOT	[T/G]	AB	AB	AB	BB	AB	AB	AB	AB
chr1_19097478_A_G	1	19097478	BOT	[T/C]	BB	BB	BB	BB	BB	BB	AB	BB
chr1_19117448_C_T	1	19117448	BOT	[T/C]	AB	AA	AA	AA	AA	AB	NC	AA
chr1_19151567_C_T	1	19151567	TOP	[A/G]	AA	BB	BB	AB	AB	AA	AA	BB
chr1_1915978_A_G	1	1915978	TOP	[A/G]	BB	AB	AB	BB	BB	AB	BB	BB
chr1_19186859_A_G	1	19186859	BOT	[T/C]	BB	AB	AB	AB	BB	BB	AB	AB
chr1_19257832_A_G	1	19257832	TOP	[A/G]	BB	BB	BB	BB	BB	BB	AB	BB
chr1_19258880_C_T	1	19258880	BOT	[T/C]	AA	BB	BB	AB	BB	AB	AB	BB
chr1_19282978_A_G	1	19282978	TOP	[A/G]	BB	BB	BB	BB	BB	BB	AB	BB
chr1_1941422_A_C	1	1941422	BOT	[T/G]	AB	AB	BB	BB	AB	BB	AB	AB
chr1_19434157_C_T	1	19434157	BOT	[T/C]	AA	BB	BB	AB	BB	AA	NC	BB
chr1_19473556_A_G	1	19473556	BOT	[T/C]	BB	AA	AA	AB	AB	BB	BB	AB
chr1_19509283_A_G	1	19509283	BOT	[T/C]	BB	AB	AB	BB	AA	BB	AB	AB
chr1_19545452_C_T	1	19545452	TOP	[A/G]	AA	AA	AA	AA	AB	AA	AA	AA
chr1_19565862_C_T	1	19565862	TOP	[A/G]	AA	BB	BB	AB	AB	AA	AB	BB
chr1_19576877_A_G	1	19576877	TOP	[A/G]	AA	AB	AB	AA	AA	AA	AA	AB
chr1_19616484_A_G	1	19616484	TOP	[A/G]	AA	BB	BB	AB	BB	AB	AB	BB
chr1_19686518_A_G	1	19686518	BOT	[T/C]	BB	AA	AA	AB	AA	AB	BB	AA
chr1_196881_C_T	1	196881	TOP	[A/G]	AB	AA	AA	AA	AB	BB	AA	AA
chr1_19758132_C_T	1	19758132	TOP	[A/G]	AA	BB	BB	AB	BB	AB	AB	BB
chr1_1978372_A_C	1	1978372	TOP	[A/C]	AB	AA	AB	BB	AB	BB	AA	AB
chr1_19793242_C_T	1	19793242	BOT	[T/C]	AA	AB	AB	AA	AA	AA	AA	AB
chr1_19828192_C_T	1	19828192	TOP	[A/G]	BB	BB	BB	BB	AB	AB	BB	AB
chr1_19866437_A_C	1	19866437	TOP	[A/C]	AA	AB	AB	AB	AA	AA	AA	AA
chr1_19868076_A_G	1	19868076	BOT	[T/C]	BB	BB	BB	BB	BB	BB	AB	BB
chr1_19882962_A_C	1	19882962	BOT	[T/G]	AA	AB	AB	AB	AB	AB	AA	AB
chr1_19930494_A_C	1	19930494	TOP	[A/C]	BB	AA	AA	AB	AA	AB	AB	AA
chr1_19975589_A_G	1	19975589	TOP	[A/G]	AA	BB	BB	AB	BB	AB	AA	BB
chr1_19990759_A_G	1	19990759	BOT	[T/C]	AA	BB	BB	AB	AA	AA	AA	AB
chr1_19998477_A_G	1	19998477	BOT	[T/C]	BB	AA	AA	AB	AA	AB	AB	AA
chr1_20013004_A_G	1	20013004	BOT	[T/C]	AB	AA	AA	AB	AA	AB	AB	AA
chr1_2013068_A_G	1	2013068	TOP	[A/G]	AB	AB	BB	BB	AB	BB	AB	AB
chr1_2049117_G_T	1	2049117	BOT	[T/G]	AB	AB	AA	AA	AB	AA	AB	AB
chr1_20625147_A_G	1	20625147	BOT	[T/C]	BB	AB	AB	BB	AA	AB	AB	AA
chr1_20641842_C_T	1	20641842	BOT	[T/C]	AA	AB	AB	AA	AA	AA	AA	AB
chr1_20642990_A_G	1	20642990	TOP	[A/G]	AA	AB	AB	AA	BB	AB	AB	BB
chr1_20648785_C_T	1	20648785	TOP	[A/G]	BB	AB	AB	BB	BB	BB	BB	AB
chr1_20723234_C_T	1	20723234	TOP	[A/G]	AB	AB	AB	BB	NC	BB	AB	AB
chr1_20750265_C_T	1	20750265	TOP	[A/G]	AB	BB	BB	BB	AB	AB	AB	AB
chr1_2078563_C_T	1	2078563	BOT	[T/C]	NC	NC	NC	NC	BB	NC	NC	BB
chr1_2083858_A_C	1	2083858	TOP	[A/C]	AB	AB	AA	AA	AB	AA	AB	AB
chr1_20870639_A_C	1	20870639	BOT	[T/G]	AB	BB	BB	AB	BB	BB	AA	BB
chr1_20879274_C_T	1	20879274	BOT	[T/C]	BB	BB	BB	BB	AB	BB	BB	BB
chr1_20902008_G_T	1	20902008	TOP	[A/C]	AB	BB	BB	BB	AB	AA	BB	AB
chr1_20933816_C_T	1	20933816	TOP	[A/G]	BB	BB	BB	BB	AB	BB	BB	BB
chr1_20944785_A_G	1	20944785	BOT	[T/C]	BB	BB	BB	AB	AB	BB	AB	BB
chr1_20985372_C_T	1	20985372	TOP	[A/G]	BB	BB	BB	BB	AB	BB	BB	BB
chr1_21076865_A_G	1	21076865	TOP	[A/G]	AB	AB	AB	AB	AA	AB	AA	AB
chr1_21104634_A_C	1	21104634	TOP	[A/C]	BB	AB	AB	BB	AB	BB	BB	BB
chr1_21146880_A_G	1	21146880	TOP	[A/G]	AB	AA	AA	AA	BB	AB	AB	AB
chr1_21179164_G_T	1	21179164	TOP	[A/C]	AB	AA	AA	AA	AB	AB	AB	AB
chr1_2119583_G_T	1	2119583	BOT	[T/G]	AB	AA	AA	AA	AA	AB	AB	AA
chr1_21206468_A_C	1	21206468	TOP	[A/C]	AB	BB	BB	AB	BB	AB	AB	BB
chr1_21258195_G_T	1	21258195	TOP	[A/C]	AB	AA	AA	AB	BB	AB	BB	AB
chr1_21275562_A_G	1	21275562	BOT	[T/C]	AA	NC	NC	BB	BB	BB	BB	BB
chr1_2136674_C_T	1	2136674	BOT	[T/C]	AA	AA	AA	AA	AA	AA	NC	AA
chr1_21373487_C_T	1	21373487	BOT	[T/C]	AB	AA	AA	AA	AA	AA	AB	AA
chr1_21405071_C_T	1	21405071	BOT	[T/C]	AB	BB	BB	BB	BB	BB	AB	BB
chr1_2145603_A_C	1	2145603	BOT	[T/G]	BB	AB	AB	BB	BB	BB	BB	BB
chr1_21503298_C_T	1	21503298	TOP	[A/G]	AB	AA	AA	AA	AB	AA	AB	AA
chr1_21600956_A_G	1	21600956	BOT	[T/C]	AB	AA	AA	AA	AA	AA	AB	AA
chr1_21610516_C_T	1	21610516	BOT	[T/C]	AA	BB	BB	AB	AA	AA	AA	AB
chr1_21713586_A_G	1	21713586	BOT	[T/C]	AB	BB	BB	BB	AB	BB	AB	BB
chr1_21718827_A_G	1	21718827	BOT	[T/C]	AB	AA	AA	AA	AB	AA	AB	AA
chr1_21860087_G_T	1	21860087	TOP	[A/C]	BB	AA	AA	AA	AA	AB	AB	AA
chr1_21868647_A_G	1	21868647	BOT	[T/C]	AB	AA	AA	NC	AA	AA	BB	NC
chr1_21894243_C_T	1	21894243	TOP	[A/G]	BB	BB	BB	BB	AB	BB	BB	BB
chr1_21931422_C_T	1	21931422	BOT	[T/C]	AA	AA	AA	AA	AA	AA	NC	AA
chr1_21967275_A_G	1	21967275	BOT	[T/C]	AB	BB	BB	BB	AB	BB	AB	BB
chr1_22066956_G_T	1	22066956	TOP	[A/C]	AB	AA	AA	AA	AB	AB	AB	AB
chr1_22075765_C_T	1	22075765	BOT	[T/C]	AA	AB	AB	AB	AA	AA	AB	AA
chr1_22107348_G_T	1	22107348	BOT	[T/G]	AA	BB	BB	AB	AA	AA	AA	AB
chr1_22133457_A_C	1	22133457	TOP	[A/C]	BB	AB	AB	AB	BB	BB	AB	BB
chr1_22186509_C_T	1	22186509	BOT	[T/C]	BB	AB	AB	AB	AB	AB	BB	AA
chr1_22273966_A_G	1	22273966	BOT	[T/C]	AA	BB	BB	BB	AB	AB	AB	BB
chr1_22322441_G_T	1	22322441	BOT	[T/G]	AB	BB	BB	BB	AA	AA	BB	AA
chr1_22328219_C_T	1	22328219	BOT	[T/C]	BB	AB	AB	AB	BB	BB	BB	BB
chr1_22359683_A_G	1	22359683	BOT	[T/C]	AB	BB	BB	BB	BB	BB	AB	BB
chr1_22428538_C_T	1	22428538	TOP	[A/G]	AB	AA	AA	AA	AA	AA	AB	AA
chr1_2243289_A_G	1	2243289	TOP	[A/G]	AA	AA	AA	AA	AA	AA	AA	AB
chr1_22466694_A_C	1	22466694	BOT	[T/G]	AA	AA	AA	AB	AA	AA	AB	AA
chr1_22481214_A_G	1	22481214	TOP	[A/G]	AA	AA	AA	AB	AA	AA	AB	AA
chr1_22575141_A_G	1	22575141	TOP	[A/G]	AA	AA	AA	AA	AB	AA	AA	AA
chr1_22609084_C_T	1	22609084	BOT	[T/C]	BB	BB	BB	AB	AA	AB	AB	AA
chr1_2262939_C_T	1	2262939	BOT	[T/C]	AB	BB	AB	AA	BB	AA	BB	AA
chr1_22644187_C_T	1	22644187	BOT	[T/C]	AB	BB	BB	BB	BB	BB	BB	BB
chr1_22679750_A_C	1	22679750	BOT	[T/G]	AA	AA	AA	AB	AA	AA	AB	AB
chr1_22715654_C_T	1	22715654	BOT	[T/C]	AA	AA	AA	AB	BB	AB	AB	BB
chr1_22750062_C_T	1	22750062	TOP	[A/G]	AB	BB	BB	AB	AA	AB	AB	AA
chr1_22783490_G_T	1	22783490	TOP	[A/C]	BB	BB	BB	AB	BB	BB	AB	BB
chr1_22857939_C_T	1	22857939	BOT	[T/C]	AA	AA	AA	AB	AB	AA	AB	AA
chr1_22921027_A_C	1	22921027	TOP	[A/C]	BB	BB	BB	AB	BB	BB	AB	BB
chr1_2296184_A_G	1	2296184	BOT	[T/C]	AA	AA	AB	BB	AB	AB	AA	AB
chr1_22964178_A_G	1	22964178	TOP	[A/G]	BB	BB	BB	AB	BB	BB	AB	BB
chr1_2438051_G_T	1	2438051	BOT	[T/G]	BB	AA	AA	AB	AA	AB	BB	AB
chr1_2477665_C_T	1	2477665	BOT	[T/C]	AA	AB	AB	AB	BB	AB	AA	BB
chr1_2511205_C_T	1	2511205	BOT	[T/C]	BB	AB	BB	BB	AA	AB	BB	AB
chr1_2532098_C_T	1	2532098	TOP	[A/G]	AA	AA	AA	AB	AB	AA	AA	AA
chr1_2582787_G_T	1	2582787	BOT	[T/G]	AA	AA	AA	AB	AA	AA	AA	AA
chr1_261342_A_G	1	261342	BOT	[T/C]	BB	BB	BB	BB	BB	AB	BB	BB
chr1_2624505_G_T	1	2624505	TOP	[A/C]	AA	AA	AA	AA	AB	AA	AA	AA
chr1_2653364_A_C	1	2653364	TOP	[A/C]	BB	BB	AB	AA	AB	AB	BB	AB
chr1_2685592_A_G	1	2685592	TOP	[A/G]	BB	BB	BB	BB	AB	BB	BB	BB
chr1_2690277_A_G	1	2690277	BOT	[T/C]	AA	AA	AA	AA	AB	AA	AA	AA
chr1_27655_C_T	1	27655	TOP	[A/G]	AA	AA	AA	AA	AB	AA	AA	AB
chr1_2766340_C_T	1	2766340	TOP	[A/G]	AB	AB	AB	AB	AB	AA	AB	AA
chr1_2793596_C_T	1	2793596	BOT	[T/C]	AA	AB	AB	AA	AA	AA	AA	AA
chr1_2796258_C_T	1	2796258	BOT	[T/C]	BB	BB	BB	BB	BB	AB	BB	BB
chr1_2824341_C_T	1	2824341	TOP	[A/G]	AA	AA	AA	AA	AA	AB	AA	AA
chr1_2844356_C_T	1	2844356	BOT	[T/C]	AA	AB	BB	AB	AB	AB	AA	AB
chr1_2880420_A_G	1	2880420	TOP	[A/G]	AA	AA	AA	AA	AA	AA	AA	AB
chr1_2904096_G_T	1	2904096	BOT	[T/G]	AB	AB	BB	BB	AB	BB	AB	BB
chr1_2941366_G_T	1	2941366	TOP	[A/C]	AB	AB	AA	AA	AB	AB	AB	AA
chr1_2975668_A_G	1	2975668	TOP	[A/G]	AA	AA	AA	AA	AB	AA	AB	AB
chr1_2992477_A_G	1	2992477	BOT	[T/C]	BB	BB	BB	BB	AB	BB	BB	AB
chr1_3010321_A_C	1	3010321	TOP	[A/C]	AB	AB	AA	AA	AB	AA	AB	AA
chr1_301596_A_G	1	301596	TOP	[A/G]	AA	AA	AA	AA	AB	AA	AA	AB
chr1_3047360_C_T	1	3047360	BOT	[T/C]	AB	AB	AB	BB	BB	AB	BB	BB
chr1_3081200_G_T	1	3081200	TOP	[A/C]	AB	AB	AB	BB	BB	AB	BB	AB
chr1_3120443_C_T	1	3120443	TOP	[A/G]	AA	AA	AA	AA	AB	AA	AA	AA
chr1_3126878_A_C	1	3126878	BOT	[T/G]	BB	BB	BB	BB	AB	BB	AB	BB
chr1_3145799_C_T	1	3145799	TOP	[A/G]	AB	AB	BB	AB	AA	AB	AA	AB
chr1_3147694_C_T	1	3147694	BOT	[T/C]	BB	BB	BB	BB	AB	BB	BB	AB
chr1_3188815_A_C	1	3188815	BOT	[T/G]	AA	AA	AA	AA	AA	AB	AA	AB
chr1_3224471_A_G	1	3224471	BOT	[T/C]	BB	BB	BB	BB	BB	BB	BB	AB
chr1_3260597_A_C	1	3260597	TOP	[A/C]	AB	AB	AB	AB	BB	AB	AB	AB
chr1_3293743_C_T	1	3293743	BOT	[T/C]	AB	AB	AB	BB	BB	AB	AB	AA
chr1_3306534_A_C	1	3306534	BOT	[T/G]	AB	AB	AB	BB	BB	AB	AB	AB
chr1_3328583_A_C	1	3328583	TOP	[A/C]	BB	BB	AB	AA	BB	BB	BB	BB
chr1_3373891_C_T	1	3373891	TOP	[A/G]	BB	BB	BB	BB	AB	AB	BB	BB
chr1_3402236_A_G	1	3402236	BOT	[T/C]	AA	AA	AA	AA	AA	AA	AA	AB
chr1_340893_C_T	1	340893	BOT	[T/C]	BB	AA	AB	AB	BB	BB	AB	AB
chr1_3434841_A_G	1	3434841	TOP	[A/G]	AA	AA	AA	AA	AA	AA	AA	AB
chr1_3451797_A_C	1	3451797	TOP	[A/C]	AB	AB	AB	BB	BB	AB	BB	BB
chr1_3456810_A_G	1	3456810	TOP	[A/G]	AB	AB	AB	AB	AB	AB	BB	BB
chr1_3477330_C_T	1	3477330	TOP	[A/G]	AA	AA	AB	AB	AA	AB	AA	AA
chr1_3509301_A_C	1	3509301	TOP	[A/C]	AB	BB	BB	BB	AB	BB	BB	BB
chr1_3581101_A_G	1	3581101	TOP	[A/G]	AB	AA	AA	AA	AB	AA	AA	AA
chr1_3591346_A_G	1	3591346	BOT	[T/C]	AB	AB	BB	BB	AB	BB	BB	BB
chr1_3631408_C_T	1	3631408	TOP	[A/G]	AA	AA	AA	AA	AA	AA	AA	AB
chr1_3654499_A_G	1	3654499	TOP	[A/G]	AB	AB	AB	AB	BB	AB	AA	AB
chr1_3691115_A_G	1	3691115	TOP	[A/G]	AA	AA	AA	AA	AA	AA	AA	AB
chr1_3724132_A_C	1	3724132	BOT	[T/G]	BB	AB	BB	AA	AB	AB	NC	BB
chr1_373564_A_G	1	373564	BOT	[T/C]	BB	BB	BB	BB	AB	BB	AB	AB
chr1_3758788_A_G	1	3758788	BOT	[T/C]	AB	AB	AB	AB	BB	AB	BB	AB
chr1_3759142_C_T	1	3759142	TOP	[A/G]	BB	AB	BB	BB	AB	BB	AB	AB
chr1_3797506_C_T	1	3797506	TOP	[A/G]	AB	BB	BB	BB	AA	BB	AA	BB
chr1_380881_A_G	1	380881	BOT	[T/C]	AA	AA	AA	AA	AA	AA	AA	AB
chr1_3831340_A_G	1	3831340	BOT	[T/C]	BB	BB	AB	AA	BB	BB	BB	AB
chr1_3859748_C_T	1	3859748	BOT	[T/C]	BB	AB	AA	AA	BB	BB	BB	AB
chr1_3901308_C_T	1	3901308	BOT	[T/C]	BB	BB	AB	AA	BB	BB	BB	AB
chr1_3912644_A_G	1	3912644	TOP	[A/G]	AB	AB	BB	BB	AB	AA	AB	BB
chr1_3939437_C_T	1	3939437	TOP	[A/G]	BB	AB	AB	BB	BB	BB	BB	BB
chr1_3973232_A_G	1	3973232	BOT	[T/C]	AB	AB	AA	AA	AB	BB	AB	AA
chr1_4037365_A_C	1	4037365	BOT	[T/G]	AB	AA	AA	AA	AB	AA	AB	AB
chr1_404955_C_T	1	404955	BOT	[T/C]	AA	AB	AB	AA	AA	AA	AA	AA
chr1_4065334_C_T	1	4065334	BOT	[T/C]	AB	AA	AA	AA	AB	AA	AB	AB
chr1_4115697_G_T	1	4115697	TOP	[A/C]	AA	AB	AA	AB	AA	AB	AA	AB
chr1_4153036_C_T	1	4153036	BOT	[T/C]	BB	AB	AB	BB	BB	BB	BB	BB
chr1_4189252_C_T	1	4189252	BOT	[T/C]	AA	BB	BB	BB	AA	AB	AA	AB
chr1_4216628_A_G	1	4216628	TOP	[A/G]	AA	AB	AB	AA	AA	AA	AA	AA
chr1_4217401_A_G	1	4217401	TOP	[A/G]	AB	BB	BB	BB	AB	AB	AB	AB
chr1_4244591_A_G	1	4244591	TOP	[A/G]	AB	BB	BB	BB	AB	AB	AB	BB
chr1_4328972_G_T	1	4328972	BOT	[T/G]	AA	BB	AB	AB	AA	AA	AA	AB
chr1_4363169_C_T	1	4363169	BOT	[T/C]	AB	AB	AB	AB	AB	AB	AB	AA
chr1_4372397_G_T	1	4372397	TOP	[A/C]	BB	AA	AB	BB	BB	BB	BB	BB
chr1_4401025_A_G	1	4401025	TOP	[A/G]	BB	NC	NC	NC	BB	BB	NC	BB
chr1_4436801_A_G	1	4436801	BOT	[T/C]	BB	AB	AB	AB	BB	BB	AB	AB
chr1_4472344_C_T	1	4472344	BOT	[T/C]	AB	BB	AB	AB	AB	AB	NC	BB
chr1_4507532_C_T	1	4507532	BOT	[T/C]	AB	AA	AA	AA	AB	AB	AB	AA
chr1_4526701_C_T	1	4526701	BOT	[T/C]	BB	AA	AB	AB	BB	BB	NC	AB
chr1_4542269_A_G	1	4542269	BOT	[T/C]	AB	BB	AB	AB	AB	AB	BB	AB
chr1_4576447_A_G	1	4576447	TOP	[A/G]	BB	AA	AB	AB	BB	BB	AB	AB
chr1_4613154_C_T	1	4613154	BOT	[T/C]	BB	AA	AB	AB	BB	BB	AB	AB
chr1_4651426_G_T	1	4651426	TOP	[A/C]	AB	BB	AB	AB	AB	AB	BB	AB
chr1_4682493_G_T	1	4682493	TOP	[A/C]	AB	BB	BB	AB	AB	AB	AB	AB
chr1_4720796_A_C	1	4720796	TOP	[A/C]	AB	BB	AB	AB	AB	AB	BB	AB
chr1_4758051_G_T	1	4758051	TOP	[A/C]	AB	AB	AA	AA	AB	AB	AA	AB
chr1_482242_A_G	1	482242	BOT	[T/C]	AA	AB	AA	AB	AA	AA	BB	AB
chr1_4849070_C_T	1	4849070	BOT	[T/C]	AB	AB	BB	AB	AB	AB	AB	AB
chr1_4865597_A_G	1	4865597	BOT	[T/C]	AA	AB	BB	BB	AA	AA	AB	AB
chr1_4934163_C_T	1	4934163	BOT	[T/C]	BB	AB	AB	AB	BB	BB	AB	AB
chr1_496453_C_T	1	496453	TOP	[A/G]	AA	AA	NC	AA	AB	AA	AA	AA
chr1_4969240_A_G	1	4969240	BOT	[T/C]	BB	AA	AA	AA	BB	BB	AB	AB
chr1_4986870_C_T	1	4986870	TOP	[A/G]	AA	AB	BB	AB	AA	AA	AB	AA
chr1_5042215_A_G	1	5042215	TOP	[A/G]	BB	BB	AA	AA	BB	BB	BB	BB
chr1_5060409_C_T	1	5060409	TOP	[A/G]	AA	AB	BB	AB	AA	AA	AB	AA
chr1_5140666_C_T	1	5140666	BOT	[T/C]	AB	AB	AB	AB	BB	AB	AB	BB
chr1_5144587_A_G	1	5144587	TOP	[A/G]	AA	AA	AA	AB	AA	AA	AA	AB
chr1_518154_C_T	1	518154	BOT	[T/C]	AA	BB	AB	AB	BB	AA	BB	BB
chr1_5183903_C_T	1	5183903	BOT	[T/C]	BB	AB	AB	BB	BB	BB	AB	BB
chr1_5213775_C_T	1	5213775	BOT	[T/C]	BB	AB	AB	BB	BB	BB	AB	BB
chr1_5295802_C_T	1	5295802	BOT	[T/C]	AB	BB	BB	BB	BB	BB	AB	BB
chr1_5325032_C_T	1	5325032	BOT	[T/C]	AB	AA	AA	AA	AA	AA	AB	AA
chr1_53639_C_T	1	53639	TOP	[A/G]	BB	BB	BB	BB	AB	BB	BB	AB
chr1_5371051_C_T	1	5371051	BOT	[T/C]	BB	AB	AB	BB	AB	BB	BB	BB
chr1_5433796_C_T	1	5433796	TOP	[A/G]	AA	AB	AA	AA	AA	AA	AA	AA
chr1_5447426_C_T	1	5447426	TOP	[A/G]	AB	BB	BB	BB	BB	BB	AB	BB
chr1_551026_A_G	1	551026	TOP	[A/G]	BB	BB	BB	BB	AA	AB	AB	AB
chr1_5577208_C_T	1	5577208	BOT	[T/C]	BB	AB	AB	BB	BB	BB	BB	BB
chr1_5612001_G_T	1	5612001	TOP	[A/C]	BB	AB	AB	BB	BB	BB	BB	BB
chr1_5649071_G_T	1	5649071	TOP	[A/C]	AA	AA	AA	AA	AB	AB	AA	AB
chr1_5720872_A_G	1	5720872	TOP	[A/G]	AB	AB	BB	BB	BB	BB	AB	BB
chr1_5754629_C_T	1	5754629	TOP	[A/G]	AB	AB	BB	BB	AB	AB	AB	AB
chr1_5755006_A_G	1	5755006	TOP	[A/G]	AA	AB	AB	AA	AA	AA	AA	AA
chr1_5766532_A_G	1	5766532	BOT	[T/C]	AA	AA	AB	AB	AA	AA	AA	AB
chr1_5789020_A_C	1	5789020	TOP	[A/C]	AB	AB	AA	AB	AA	AA	AB	AB
chr1_5829143_A_G	1	5829143	BOT	[T/C]	AB	BB	AB	AB	AA	AA	BB	AB
chr1_5862174_C_T	1	5862174	BOT	[T/C]	AB	AB	AA	AA	AA	AA	BB	AA
chr1_586987_C_T	1	586987	BOT	[T/C]	AB	AB	AB	BB	BB	AB	NC	BB
chr1_5898296_A_G	1	5898296	BOT	[T/C]	AB	BB	BB	BB	BB	AB	BB	BB
chr1_5906790_A_C	1	5906790	TOP	[A/C]	AB	AB	BB	BB	BB	BB	AA	BB
chr1_5933624_A_G	1	5933624	BOT	[T/C]	AB	AB	AA	AA	AA	AA	BB	AA
chr1_5973457_C_T	1	5973457	BOT	[T/C]	AB	AB	BB	AB	AB	AA	BB	AB
chr1_6004042_A_G	1	6004042	BOT	[T/C]	AA	AA	AA	AB	AA	AA	AA	AB
chr1_6062580_G_T	1	6062580	BOT	[T/G]	AA	AB	AB	AA	AA	AA	AA	AB
chr1_6074809_G_T	1	6074809	BOT	[T/G]	AB	AA	AA	AA	AA	BB	AB	AA
chr1_6109262_A_G	1	6109262	TOP	[A/G]	AB	AB	AA	AA	AA	AA	AB	AB
chr1_61191_C_T	1	61191	BOT	[T/C]	AB	BB	BB	BB	BB	AB	BB	BB
chr1_6142886_C_T	1	6142886	BOT	[T/C]	AA	BB	BB	BB	BB	AA	AA	BB
chr1_6214249_A_G	1	6214249	BOT	[T/C]	AB	BB	BB	BB	BB	AB	AB	BB
chr1_6218393_C_T	1	6218393	BOT	[T/C]	AB	AA	AA	AA	AA	AA	AB	AA
chr1_625863_C_T	1	625863	TOP	[A/G]	NC	BB	NC	BB	AA	BB	BB	AB
chr1_6298545_A_G	1	6298545	TOP	[A/G]	AA	AA	AA	AB	AA	AB	AA	AB
chr1_6322315_A_G	1	6322315	BOT	[T/C]	AB	AB	AB	AB	AB	BB	AB	AB
chr1_6359505_A_C	1	6359505	TOP	[A/C]	AB	AA	AA	AA	AA	AA	AB	AA
chr1_6366603_A_G	1	6366603	BOT	[T/C]	AB	AB	AB	AB	AB	BB	AB	AB
chr1_6394661_A_C	1	6394661	TOP	[A/C]	BB	BB	BB	BB	BB	AB	BB	BB
chr1_6416049_A_G	1	6416049	TOP	[A/G]	AA	AA	AA	AA	AA	AA	AB	AB
chr1_6433498_C_T	1	6433498	BOT	[T/C]	AA	AB	BB	AB	AB	AA	AA	AA
chr1_6466156_A_C	1	6466156	TOP	[A/C]	AB	BB	BB	BB	BB	BB	AB	BB
chr1_658493_A_G	1	658493	BOT	[T/C]	AA	AB	AA	AA	AB	AA	AB	BB
chr1_6612179_A_G	1	6612179	TOP	[A/G]	AA	AB	AB	AB	BB	AB	AA	AA
chr1_6673914_C_T	1	6673914	BOT	[T/C]	AB	BB	BB	BB	BB	BB	BB	BB
chr1_6681414_C_T	1	6681414	BOT	[T/C]	AA	AA	AB	AB	AA	AB	AB	AB
chr1_6715047_A_G	1	6715047	BOT	[T/C]	AB	AB	AB	AB	BB	AB	AB	AA
chr1_6737530_A_G	1	6737530	BOT	[T/C]	BB	BB	BB	BB	BB	AB	BB	BB
chr1_6751978_A_G	1	6751978	TOP	[A/G]	AA	AB	AB	AB	AA	AB	AB	AB
chr1_6829041_A_G	1	6829041	TOP	[A/G]	AB	AA	AA	AA	AA	AB	AA	AA
chr1_6864170_C_T	1	6864170	BOT	[T/C]	AB	AA	AA	AB	AA	AB	AB	AB
chr1_6897691_A_G	1	6897691	BOT	[T/C]	AB	AA	AA	AB	AB	AB	BB	BB
chr1_690894_G_T	1	690894	BOT	[T/G]	BB	BB	BB	AB	AB	BB	BB	BB
chr1_6966305_C_T	1	6966305	TOP	[A/G]	BB	AB	AB	AB	AB	AB	BB	AB
chr1_6982438_A_G	1	6982438	BOT	[T/C]	AB	AB	AB	AB	BB	AB	AA	AB
chr1_6994761_A_G	1	6994761	TOP	[A/G]	AB	AB	AB	AB	BB	AB	AA	AB
chr1_7044463_A_G	1	7044463	TOP	[A/G]	AB	BB	BB	BB	BB	BB	BB	BB
chr1_7082544_A_G	1	7082544	BOT	[T/C]	BB	BB	BB	BB	BB	BB	AB	BB
chr1_7108686_A_C	1	7108686	TOP	[A/C]	AB	AB	BB	BB	AA	BB	AB	BB
chr1_7135890_A_G	1	7135890	TOP	[A/G]	AB	AB	AB	AB	AA	BB	AB	BB
chr1_7146078_C_T	1	7146078	TOP	[A/G]	AB	AB	AB	AB	BB	AB	AB	AB
chr1_7251013_C_T	1	7251013	BOT	[T/C]	AB	AB	AA	AA	AA	AB	AB	AA
chr1_728704_A_G	1	728704	TOP	[A/G]	AB	AB	AA	AA	BB	AB	AB	BB
chr1_7288880_C_T	1	7288880	TOP	[A/G]	AB	AB	AB	AB	AA	AB	AB	AB
chr1_7290040_A_G	1	7290040	TOP	[A/G]	AA	AA	AA	AA	AB	AA	AA	AB
chr1_7349729_C_T	1	7349729	TOP	[A/G]	AB	AB	AB	AB	BB	AB	AB	AA
chr1_7440546_A_G	1	7440546	TOP	[A/G]	BB	BB	BB	BB	AB	BB	BB	BB
chr1_7467466_A_C	1	7467466	TOP	[A/C]	AB	AB	AB	AB	NC	AB	AB	BB
chr1_7498727_C_T	1	7498727	BOT	[T/C]	AB	AB	AB	AB	AB	AB	AB	BB
chr1_7571627_C_T	1	7571627	BOT	[T/C]	AB	AB	AB	AB	AA	AB	AB	BB
chr1_7593079_A_G	1	7593079	BOT	[T/C]	AB	AB	AA	AA	AB	AB	AB	AA
chr1_7621682_C_T	1	7621682	BOT	[T/C]	AB	AB	AA	AA	NC	AB	AB	AA
chr1_765680_C_T	1	765680	BOT	[T/C]	AB	BB	AB	AB	BB	AB	BB	BB
chr1_7691369_A_G	1	7691369	BOT	[T/C]	AA	AA	AB	AB	AB	AA	AA	AA
chr1_7741364_C_T	1	7741364	BOT	[T/C]	AB	AB	BB	BB	AB	AB	AB	BB
chr1_7757014_C_T	1	7757014	TOP	[A/G]	AB	AB	BB	BB	AB	AB	AB	BB
chr1_7852689_C_T	1	7852689	BOT	[T/C]	AB	AB	AA	AA	AB	AB	AB	AA
chr1_7870690_A_G	1	7870690	TOP	[A/G]	AB	AB	BB	BB	AB	AB	AB	BB
chr1_7963986_A_G	1	7963986	TOP	[A/G]	AB	AB	AA	AA	AB	AB	AB	AA
chr1_799033_A_C	1	799033	TOP	[A/C]	AA	AB	AB	AB	BB	AA	AA	AB
chr1_799751_C_T	1	799751	BOT	[T/C]	BB	AB	AA	AA	BB	BB	AB	BB
chr1_8000724_A_C	1	8000724	TOP	[A/C]	BB	AB	AA	AA	AB	BB	AB	AA
chr1_8037779_C_T	1	8037779	BOT	[T/C]	AA	AA	AA	AA	AB	AA	AA	AA
chr1_8071772_G_T	1	8071772	BOT	[T/G]	AA	AB	AB	AA	AA	AA	AA	AB
chr1_8176660_A_G	1	8176660	BOT	[T/C]	AB	AB	AB	AB	AB	AB	AB	BB
chr1_8202506_A_G	1	8202506	TOP	[A/G]	AB	AB	AB	AB	AB	AB	AB	BB
chr1_8210025_A_G	1	8210025	BOT	[T/C]	AB	AB	AB	AA	AA	AB	AA	AB
chr1_8249755_A_G	1	8249755	TOP	[A/G]	AB	AB	AB	AB	AB	AB	AB	BB
chr1_8324181_A_G	1	8324181	TOP	[A/G]	BB	BB	BB	AB	BB	BB	AB	AB
chr1_8384254_C_T	1	8384254	BOT	[T/C]	BB	BB	NC	NC	BB	BB	BB	NC
chr1_8429331_A_C	1	8429331	TOP	[A/C]	AA	AA	AA	AB	AA	AA	AA	AA
chr1_8429533_A_G	1	8429533	BOT	[T/C]	BB	BB	BB	AB	AB	BB	BB	BB
chr1_8467057_G_T	1	8467057	BOT	[T/G]	BB	BB	BB	AB	BB	BB	BB	BB
chr1_8492715_C_T	1	8492715	BOT	[T/C]	AB	BB	AB	AA	AB	AB	AB	AB
chr1_8539545_C_T	1	8539545	BOT	[T/C]	AA	AA	AA	AA	AA	AA	NC	AB
chr1_8649084_C_T	1	8649084	TOP	[A/G]	BB	BB	BB	AA	BB	BB	BB	BB
chr1_8671481_C_T	1	8671481	BOT	[T/C]	AB	AA	AA	AA	AA	AB	AA	AA
chr1_8676663_C_T	1	8676663	TOP	[A/G]	AB	AA	AA	AA	AA	AB	AB	AB
chr1_8710909_A_G	1	8710909	BOT	[T/C]	AB	AB	AB	BB	AB	AB	AB	AA
chr1_8744093_C_T	1	8744093	TOP	[A/G]	BB	BB	BB	BB	AB	BB	BB	BB
chr1_8780767_A_C	1	8780767	TOP	[A/C]	AA	AA	AA	AA	AB	AA	AA	AA
chr1_8821137_A_G	1	8821137	TOP	[A/G]	BB	BB	BB	BB	AB	BB	BB	BB
chr1_8890473_A_C	1	8890473	TOP	[A/C]	BB	AB	AA	AB	AB	BB	BB	AA
chr1_8924712_C_T	1	8924712	BOT	[T/C]	AA	AB	BB	AA	AB	AA	AA	BB
chr1_8958136_C_T	1	8958136	TOP	[A/G]	AA	AA	AB	AB	AA	AA	AA	AB
chr1_8975551_C_T	1	8975551	BOT	[T/C]	AB	BB	AB	AB	BB	AB	NC	AB
chr1_8997177_A_C	1	8997177	TOP	[A/C]	AB	AA	AB	AB	AA	AB	AA	AA
chr1_9000381_A_C	1	9000381	TOP	[A/C]	BB	AB	AB	BB	BB	BB	BB	AB
chr1_9015822_A_G	1	9015822	BOT	[T/C]	AA	AA	AA	AA	AA	AA	AB	AA
chr1_9096264_A_G	1	9096264	TOP	[A/G]	AB	BB	BB	BB	BB	AB	AB	AB
chr1_9305946_A_G	1	9305946	TOP	[A/G]	AB	AB	BB	AB	AB	AB	AB	BB
chr1_9321654_A_C	1	9321654	BOT	[T/G]	AB	AB	AA	AB	AB	AB	BB	AA
chr1_9353859_A_G	1	9353859	TOP	[A/G]	BB	BB	BB	BB	BB	BB	AB	BB
chr1_9436830_G_T	1	9436830	TOP	[A/C]	BB	AB	AB	BB	BB	BB	AB	AB
chr1_946801_C_T	1	946801	BOT	[T/C]	AB	AA	AB	BB	BB	AB	NC	AB
chr1_9496251_A_C	1	9496251	TOP	[A/C]	AA	AB	AA	AA	AB	AB	AA	AA
chr1_9567236_G_T	1	9567236	BOT	[T/G]	AB	BB	BB	BB	AB	AB	BB	AB
chr1_9713401_A_G	1	9713401	BOT	[T/C]	AB	BB	BB	AB	BB	BB	AA	BB
chr1_9743721_C_T	1	9743721	TOP	[A/G]	BB	AB	AA	AB	BB	BB	BB	AB
chr1_9779606_A_G	1	9779606	TOP	[A/G]	AA	AB	AB	AA	AB	AA	AA	AB
chr1_9816361_A_G	1	9816361	TOP	[A/G]	AB	BB	BB	BB	BB	AB	BB	AB
chr1_9849128_A_G	1	9849128	TOP	[A/G]	AB	AA	AA	AA	AA	AB	AA	AA
chr1_9887731_A_G	1	9887731	BOT	[T/C]	AB	AA	AA	AA	AA	AB	AA	AA
chr1_9900799_C_T	1	9900799	BOT	[T/C]	AB	AB	AA	AA	BB	BB	AA	AB
chr1_9923278_C_T	1	9923278	BOT	[T/C]	AB	AA	AA	AB	AA	AA	BB	AA
chr1_9959141_A_C	1	9959141	TOP	[A/C]	BB	AB	BB	BB	AB	AB	BB	BB
chr1_random_299123_A_G	1_RANDOM	299123	TOP	[A/G]	AB	AB	AB	AA	AA	AB	AA	AB
chr1_random_310365_A_C	1_RANDOM	310365	TOP	[A/C]	AB	AB	AB	BB	AB	AB	BB	AB
chr1_random_312051_A_G	1_RANDOM	312051	TOP	[A/G]	AB	AB	AB	AA	AA	AB	AA	AB
chr1_random_320168_A_G	1_RANDOM	320168	TOP	[A/G]	AB	AB	BB	AB	BB	AB	AA	AB
chr1_random_468874_C_T	1_RANDOM	468874	TOP	[A/G]	AB	AB	AA	AB	AA	AB	BB	AB
chr1_random_487744_C_T	1_RANDOM	487744	BOT	[T/C]	AA	AA	AA	AA	AA	AA	NC	AA
chr1_random_490188_A_G	1_RANDOM	490188	TOP	[A/G]	BB	BB	AB	AB	AB	BB	BB	BB
chr1_random_522206_A_C	1_RANDOM	522206	BOT	[T/G]	AA	AB	AB	BB	AB	AB	AB	AB
chr1_random_522794_C_T	1_RANDOM	522794	BOT	[T/C]	AA	AA	AA	AA	AA	AA	AA	AB
chr1_random_545810_C_T	1_RANDOM	545810	TOP	[A/G]	AB	AB	AB	BB	BB	AB	BB	AB
chr1_random_546617_A_G	1_RANDOM	546617	TOP	[A/G]	AB	AB	AB	BB	BB	AB	BB	AB
chr10_10007512_A_G	10	10007512	TOP	[A/G]	AB	AB	BB	BB	AA	BB	AB	BB
chr10_1001102_G_T	10	1001102	TOP	[A/C]	AB	BB	AB	AA	BB	BB	AB	BB
chr10_10094664_C_T	10	10094664	BOT	[T/C]	AA	AA	AA	AB	AA	AA	AB	AB
chr10_10112396_C_T	10	10112396	BOT	[T/C]	BB	AB	BB	BB	BB	BB	BB	BB
chr10_10153909_A_C	10	10153909	TOP	[A/C]	AA	AA	AA	AA	AA	AA	AB	AA
chr10_10164076_C_T	10	10164076	BOT	[T/C]	AA	AB	BB	BB	AA	AB	AB	BB
chr10_10173531_A_G	10	10173531	BOT	[T/C]	AA	AB	AB	AB	AA	AB	AB	AB
chr10_10225999_A_G	10	10225999	TOP	[A/G]	BB	AB	AA	AB	AB	AB	AB	AB
chr10_1038557_A_G	10	1038557	BOT	[T/C]	BB	AB	AB	AA	AA	BB	AA	BB
chr10_1040043_G_T	10	1040043	TOP	[A/C]	AA	AB	AB	BB	BB	AA	BB	AA
chr10_10477108_C_T	10	10477108	TOP	[A/G]	AA	AB	AA	AA	AA	AA	AA	AA
chr10_10477837_A_G	10	10477837	BOT	[T/C]	BB	AB	BB	BB	BB	BB	BB	BB
chr10_10497318_C_T	10	10497318	TOP	[A/G]	BB	BB	BB	BB	AB	BB	AB	BB
chr10_10528389_A_G	10	10528389	TOP	[A/G]	AB	BB	BB	AB	AA	AB	AB	AB
chr10_10532746_C_T	10	10532746	BOT	[T/C]	AB	AA	AA	AB	AB	AB	AB	AB
chr10_10559171_A_C	10	10559171	TOP	[A/C]	AB	BB	BB	AB	BB	AB	BB	AB
chr10_10642694_A_G	10	10642694	BOT	[T/C]	AB	AB	AA	AB	BB	AB	AB	AB
chr10_10645433_A_G	10	10645433	BOT	[T/C]	AB	AB	AA	AB	BB	AB	AB	AB
chr10_10658666_A_G	10	10658666	BOT	[T/C]	BB	NC	NC	AA	NC	BB	NC	AA
chr10_1069442_C_T	10	1069442	TOP	[A/G]	AA	BB	BB	BB	BB	AB	BB	AB
chr10_10755483_C_T	10	10755483	TOP	[A/G]	AB	AB	BB	AB	AA	AB	AB	AB
chr10_10784022_A_C	10	10784022	BOT	[T/G]	AB	AA	AA	AA	AB	AB	AB	AA
chr10_10861392_A_C	10	10861392	TOP	[A/C]	AB	AB	AB	AB	BB	AB	AB	AB
chr10_10865611_A_G	10	10865611	TOP	[A/G]	AB	AA	AA	AA	AB	AB	AB	AA
chr10_10946300_G_T	10	10946300	TOP	[A/C]	AB	AA	AA	AB	AB	AB	AA	AB
chr10_10947246_C_T	10	10947246	BOT	[T/C]	BB	NC	NC	BB	BB	BB	NC	BB
chr10_10985237_G_T	10	10985237	TOP	[A/C]	BB	BB	BB	AB	BB	BB	AB	AB
chr10_1104305_A_C	10	1104305	TOP	[A/C]	AA	BB	BB	BB	AB	AB	BB	AB
chr10_11052478_A_G	10	11052478	TOP	[A/G]	AB	BB	BB	BB	BB	BB	BB	BB
chr10_11068435_G_T	10	11068435	BOT	[T/G]	BB	AB	AB	AB	BB	AB	AB	AB
chr10_11097827_A_G	10	11097827	BOT	[T/C]	AA	AA	AA	AB	AA	AA	AA	AB
chr10_11139239_A_G	10	11139239	BOT	[T/C]	AB	AB	AB	AA	BB	AB	AB	AA
chr10_1120155_C_T	10	1120155	BOT	[T/C]	BB	AB	AB	BB	BB	AB	BB	AB
chr10_11208019_C_T	10	11208019	BOT	[T/C]	BB	BB	BB	AB	BB	BB	BB	AB
chr10_11244140_A_G	10	11244140	TOP	[A/G]	AA	AB	AB	AA	AA	AA	AA	AA
chr10_11249272_C_T	10	11249272	BOT	[T/C]	AB	AB	AB	AB	BB	AB	AB	AB
chr10_11269683_A_G	10	11269683	TOP	[A/G]	AA	AA	AA	AB	BB	AA	AA	AB
chr10_11297269_A_G	10	11297269	BOT	[T/C]	BB	AB	AB	AB	AB	BB	AB	AB
chr10_11297671_C_T	10	11297671	TOP	[A/G]	AA	AB	AB	AB	BB	AA	AB	AB
chr10_1135127_G_T	10	1135127	BOT	[T/G]	AA	AA	AA	AA	AB	AA	AA	AA
chr10_11410756_A_G	10	11410756	BOT	[T/C]	AB	AA	AA	AA	AB	AB	AA	AA
chr10_11412145_G_T	10	11412145	TOP	[A/C]	BB	AB	AB	AB	AB	BB	BB	AB
chr10_11424048_C_T	10	11424048	BOT	[T/C]	AB	AB	AB	AB	AA	AB	AB	AB
chr10_11533079_C_T	10	11533079	TOP	[A/G]	BB	BB	BB	AB	AA	BB	AB	AB
chr10_11554816_A_G	10	11554816	TOP	[A/G]	BB	BB	BB	AB	AB	BB	BB	AB
chr10_11559458_C_T	10	11559458	TOP	[A/G]	BB	AA	AA	AB	AB	AB	AA	AB
chr10_11571086_A_G	10	11571086	BOT	[T/C]	AA	AB	AB	AB	AA	AB	AB	AB
chr10_11742614_A_G	10	11742614	TOP	[A/G]	AA	AB	AB	AA	AB	AA	AA	AA
chr10_11744734_C_T	10	11744734	TOP	[A/G]	AB	AA	AA	AA	AA	AB	AA	AA
chr10_11765242_C_T	10	11765242	TOP	[A/G]	AA	AB	AB	NC	AB	AB	NC	NC
chr10_11784085_C_T	10	11784085	TOP	[A/G]	AB	AB	AB	AA	AA	AA	AA	AA
chr10_11791113_C_T	10	11791113	TOP	[A/G]	AA	AB	AB	AB	AA	AB	AB	AB
chr10_11814307_A_G	10	11814307	BOT	[T/C]	BB	AB	AB	BB	BB	BB	BB	BB
chr10_11843831_C_T	10	11843831	BOT	[T/C]	AB	BB	BB	AB	AB	AB	AB	AB
chr10_11876886_A_G	10	11876886	TOP	[A/G]	AA	AB	AB	AA	AA	AA	AA	AA
chr10_11908465_A_G	10	11908465	BOT	[T/C]	BB	AB	AB	BB	BB	BB	BB	BB
chr10_11965063_C_T	10	11965063	BOT	[T/C]	AA	AA	AA	AA	NC	AA	AA	AA
chr10_11970608_C_T	10	11970608	TOP	[A/G]	BB	BB	BB	AB	BB	BB	BB	AB
chr10_1197253_C_T	10	1197253	TOP	[A/G]	BB	AB	BB	BB	AB	BB	AB	BB
chr10_1197827_A_G	10	1197827	BOT	[T/C]	BB	AB	AB	AB	AA	BB	AB	BB
chr10_12022076_A_G	10	12022076	TOP	[A/G]	AA	AA	AA	AB	AA	AA	AA	AB
chr10_12052595_C_T	10	12052595	BOT	[T/C]	BB	AB	AB	AB	BB	AB	AA	AB
chr10_12144397_A_G	10	12144397	BOT	[T/C]	AB	BB	BB	BB	BB	BB	BB	BB
chr10_12175377_A_G	10	12175377	TOP	[A/G]	AB	BB	BB	BB	BB	AB	BB	BB
chr10_12175802_C_T	10	12175802	BOT	[T/C]	AB	AA	AA	AA	AA	AB	AA	AA
chr10_12195539_A_G	10	12195539	BOT	[T/C]	BB	BB	BB	AB	BB	BB	BB	AB
chr10_12201900_C_T	10	12201900	BOT	[T/C]	AB	AA	AA	AA	AA	AB	AA	AA
chr10_12271590_C_T	10	12271590	BOT	[T/C]	BB	BB	BB	AB	AA	BB	BB	AB
chr10_12291877_A_G	10	12291877	BOT	[T/C]	BB	BB	BB	AB	AB	BB	BB	AB
chr10_1231367_C_T	10	1231367	TOP	[A/G]	BB	AB	AB	BB	BB	AB	BB	AB
chr10_125104_A_G	10	125104	BOT	[T/C]	AA	AA	AA	AA	AA	AA	AA	AB
chr10_1262661_A_C	10	1262661	TOP	[A/C]	BB	AB	BB	AB	AB	BB	AB	BB
chr10_12746780_A_G	10	12746780	TOP	[A/G]	AB	BB	BB	BB	BB	BB	BB	BB
chr10_12763293_C_T	10	12763293	BOT	[T/C]	BB	AB	AB	BB	BB	BB	AB	BB
chr10_1277204_C_T	10	1277204	BOT	[T/C]	AB	AB	BB	BB	AB	AB	BB	BB
chr10_12837062_C_T	10	12837062	BOT	[T/C]	AA	AB	AB	AA	AA	AA	AA	AA
chr10_12870632_A_G	10	12870632	TOP	[A/G]	AB	BB	BB	BB	BB	AB	BB	BB
chr10_12881039_A_C	10	12881039	BOT	[T/G]	AB	AB	AB	BB	BB	AB	BB	BB
chr10_12929074_A_G	10	12929074	BOT	[T/C]	BB	AB	AB	BB	BB	BB	NC	BB
chr10_12936197_A_C	10	12936197	BOT	[T/G]	BB	BB	AB	NC	AB	BB	NC	NC
chr10_1294443_C_T	10	1294443	BOT	[T/C]	AB	AA	AA	AB	AB	AA	AB	AB
chr10_12967436_A_C	10	12967436	TOP	[A/C]	AB	AB	AB	AB	AB	AA	AB	AB
chr10_13035260_C_T	10	13035260	BOT	[T/C]	AA	AA	AA	AA	AA	AA	AA	AA
chr10_13493387_C_T	10	13493387	BOT	[T/C]	AA	AA	AB	AB	AA	AB	BB	AB
chr10_1353542_A_G	10	1353542	BOT	[T/C]	AA	AA	AA	AA	AB	AA	AA	AA
chr10_13563336_C_T	10	13563336	TOP	[A/G]	AB	AA	AA	AB	AA	AA	AA	AB
chr10_13565051_C_T	10	13565051	TOP	[A/G]	AA	AA	AB	AB	AA	AB	AB	AB
chr10_1358731_A_C	10	1358731	TOP	[A/C]	BB	AB	AA	AB	AB	AB	BB	AA
chr10_138539_A_C	10	138539	BOT	[T/G]	BB	BB	BB	BB	BB	BB	BB	AB
chr10_1393887_A_G	10	1393887	TOP	[A/G]	BB	AB	BB	AB	AB	BB	AB	BB
chr10_1421120_A_G	10	1421120	TOP	[A/G]	BB	BB	BB	BB	AB	BB	AB	AB
chr10_1430111_A_G	10	1430111	TOP	[A/G]	AA	AA	AA	AA	AA	AA	AB	AA
chr10_14391701_G_T	10	14391701	BOT	[T/G]	AB	AA	AA	AB	AA	AB	BB	AB
chr10_14395705_A_G	10	14395705	BOT	[T/C]	AB	BB	BB	AB	AA	AB	NC	AB
chr10_14443397_G_T	10	14443397	TOP	[A/C]	AB	AB	AB	AB	AA	AA	AB	AB
chr10_14457021_C_T	10	14457021	TOP	[A/G]	AB	AB	AB	BB	AA	BB	BB	BB
chr10_1454013_A_G	10	1454013	BOT	[T/C]	BB	BB	AB	AB	AB	BB	AB	AA
chr10_14727833_A_G	10	14727833	BOT	[T/C]	BB	BB	BB	BB	AA	BB	NC	BB
chr10_14761015_A_G	10	14761015	TOP	[A/G]	BB	AB	AB	AB	BB	AB	AA	AB
chr10_14790259_C_T	10	14790259	BOT	[T/C]	BB	AB	AB	BB	BB	BB	BB	BB
chr10_1488307_C_T	10	1488307	TOP	[A/G]	AA	AA	AA	AA	AA	AA	AB	AB
chr10_14953379_C_T	10	14953379	BOT	[T/C]	AA	AB	AB	AA	AB	AA	AB	AA
chr10_15022388_A_G	10	15022388	TOP	[A/G]	BB	AB	AB	AB	AB	BB	BB	AB
chr10_15028825_A_G	10	15028825	TOP	[A/G]	AA	BB	BB	BB	AB	AB	BB	BB
chr10_1505500_G_T	10	1505500	BOT	[T/G]	AA	AA	AB	AB	AB	AA	AA	AB
chr10_15075054_A_C	10	15075054	TOP	[A/C]	BB	AA	AA	AA	BB	AA	AA	AA
chr10_15121082_C_T	10	15121082	BOT	[T/C]	BB	AA	AA	AB	BB	AB	AB	AB
chr10_15149602_G_T	10	15149602	TOP	[A/C]	AB	BB	BB	AB	AB	AB	AB	AB
chr10_1516249_A_G	10	1516249	TOP	[A/G]	AA	AB	AB	AA	AA	AB	AA	AA
chr10_15193356_A_G	10	15193356	TOP	[A/G]	AB	BB	BB	AB	AB	BB	BB	AB
chr10_15228603_A_C	10	15228603	BOT	[T/G]	AB	BB	BB	BB	AB	AB	BB	BB
chr10_15263611_A_G	10	15263611	TOP	[A/G]	AA	AB	AB	BB	AA	AB	AB	BB
chr10_15286183_A_C	10	15286183	TOP	[A/C]	AB	AA	AA	AA	AA	AA	AA	AA
chr10_15435307_A_G	10	15435307	BOT	[T/C]	AA	AA	AA	AA	AB	AA	AA	AA
chr10_15437710_C_T	10	15437710	TOP	[A/G]	AB	BB	BB	BB	BB	BB	BB	BB
chr10_15520094_C_T	10	15520094	BOT	[T/C]	BB	AB	AB	AA	AB	AB	AA	AA
chr10_15521152_C_T	10	15521152	BOT	[T/C]	AB	AA	AA	AA	AA	AA	AA	AA
chr10_15546181_G_T	10	15546181	BOT	[T/G]	AA	AB	AB	BB	AA	AB	AB	BB
chr10_15563249_C_T	10	15563249	TOP	[A/G]	AA	AB	AB	BB	AA	AB	BB	NC
chr10_1581644_A_G	10	1581644	TOP	[A/G]	AA	BB	AB	AB	AB	AB	BB	AA
chr10_1589730_C_T	10	1589730	TOP	[A/G]	AA	BB	AB	AB	AB	AB	AB	AA
chr10_1616598_C_T	10	1616598	TOP	[A/G]	AA	BB	AB	AB	AB	AB	BB	AB
chr10_16418120_C_T	10	16418120	TOP	[A/G]	BB	BB	AB	AB	BB	AB	BB	AB
chr10_16430008_C_T	10	16430008	TOP	[A/G]	BB	AB	BB	AB	BB	BB	AB	AB
chr10_1643390_C_T	10	1643390	TOP	[A/G]	AA	AA	AA	AB	AA	AA	AB	AA
chr10_16530827_A_G	10	16530827	TOP	[A/G]	BB	AB	AA	AB	NC	AB	BB	AB
chr10_16539119_C_T	10	16539119	BOT	[T/C]	AA	AA	AA	AB	AA	AA	BB	AB
chr10_16569585_G_T	10	16569585	BOT	[T/G]	AA	AA	AA	AA	AB	AA	AA	AA
chr10_16591343_A_G	10	16591343	BOT	[T/C]	BB	AB	AB	BB	BB	BB	BB	BB
chr10_16609803_A_G	10	16609803	TOP	[A/G]	AA	AA	AA	AB	AA	AA	AB	AB
chr10_16637143_A_G	10	16637143	TOP	[A/G]	BB	BB	BB	AB	AB	BB	AB	AB
chr10_16637757_A_G	10	16637757	TOP	[A/G]	BB	BB	BB	AB	AA	BB	AB	AB
chr10_1665786_A_G	10	1665786	BOT	[T/C]	AA	AB	AA	AB	BB	AA	BB	AB
chr10_16720337_C_T	10	16720337	TOP	[A/G]	AA	AA	AA	AB	BB	AA	AB	AB
chr10_16720740_A_G	10	16720740	BOT	[T/C]	BB	BB	BB	AB	AA	BB	AB	AB
chr10_1674923_A_G	10	1674923	TOP	[A/G]	BB	AA	AB	AB	AB	AB	AB	BB
chr10_16834749_A_G	10	16834749	BOT	[T/C]	AB	BB	BB	AB	BB	AB	AB	AB
chr10_1711374_A_C	10	1711374	TOP	[A/C]	AA	AB	AA	AB	AB	AA	BB	AA
chr10_17147081_A_C	10	17147081	TOP	[A/C]	AB	BB	BB	BB	AB	AB	BB	BB
chr10_17219752_A_G	10	17219752	TOP	[A/G]	AB	AA	AA	AB	BB	AB	BB	AB
chr10_17243441_G_T	10	17243441	TOP	[A/C]	AA	AB	AA	AB	BB	AA	BB	AB
chr10_17275392_A_G	10	17275392	TOP	[A/G]	BB	BB	BB	AB	AA	BB	AB	AB
chr10_17281922_A_G	10	17281922	TOP	[A/G]	AB	BB	BB	BB	BB	AB	AB	BB
chr10_17307857_C_T	10	17307857	BOT	[T/C]	AB	BB	BB	BB	BB	AB	BB	BB
chr10_17318246_A_G	10	17318246	TOP	[A/G]	AB	BB	BB	BB	BB	AB	AB	BB
chr10_1740267_C_T	10	1740267	BOT	[T/C]	NC	AB	AA	BB	AB	AA	AB	NC
chr10_17403870_C_T	10	17403870	BOT	[T/C]	AA	AA	AA	AA	AB	AA	AB	AB
chr10_17435940_C_T	10	17435940	BOT	[T/C]	AA	AB	AB	AA	AB	AA	BB	AB
chr10_17470892_A_G	10	17470892	BOT	[T/C]	BB	BB	BB	AB	BB	BB	BB	BB
chr10_1748241_A_G	10	1748241	BOT	[T/C]	AB	AA	AA	AA	AB	AB	AB	AB
chr10_17516525_A_C	10	17516525	TOP	[A/C]	AA	AA	AA	AB	AA	AA	AA	AA
chr10_17532148_A_G	10	17532148	TOP	[A/G]	BB	BB	BB	BB	BB	BB	AB	AB
chr10_17561639_C_T	10	17561639	TOP	[A/G]	BB	BB	AB	AB	BB	AB	BB	AB
chr10_17566508_C_T	10	17566508	TOP	[A/G]	BB	AA	AB	BB	BB	BB	BB	BB
chr10_17575959_C_T	10	17575959	TOP	[A/G]	AB	BB	BB	BB	BB	AB	BB	BB
chr10_17692954_A_G	10	17692954	TOP	[A/G]	AB	BB	BB	BB	AB	BB	BB	BB
chr10_17723657_A_C	10	17723657	BOT	[T/G]	BB	BB	AB	AB	BB	AB	BB	AB
chr10_1777966_A_G	10	1777966	BOT	[T/C]	AA	AB	AB	AA	AB	AB	AB	AB
chr10_177838_C_T	10	177838	BOT	[T/C]	AA	AB	BB	BB	AA	AB	AA	AB
chr10_17787494_A_G	10	17787494	TOP	[A/G]	BB	BB	BB	BB	AB	BB	AB	AB
chr10_17794480_A_G	10	17794480	BOT	[T/C]	AB	AB	AB	AB	BB	AB	BB	AB
chr10_17880717_A_G	10	17880717	TOP	[A/G]	BB	AB	AB	AB	AA	BB	BB	BB
chr10_17897826_A_G	10	17897826	BOT	[T/C]	BB	BB	BB	BB	BB	BB	AB	AB
chr10_17945754_C_T	10	17945754	TOP	[A/G]	AB	BB	AB	AB	BB	AB	BB	AB
chr10_17962082_C_T	10	17962082	TOP	[A/G]	AB	BB	AB	AB	BB	AB	BB	AB
chr10_17990933_A_C	10	17990933	BOT	[T/G]	AA	AB	BB	BB	AA	AA	AA	AA
chr10_18044328_A_G	10	18044328	BOT	[T/C]	AB	BB	BB	BB	AB	AB	NC	AB
chr10_18050821_A_C	10	18050821	BOT	[T/G]	AB	AA	AA	AA	AA	AB	AB	AB
chr10_1806735_A_G	10	1806735	BOT	[T/C]	BB	AA	AB	AB	AA	AB	AA	AB
chr10_18079556_C_T	10	18079556	TOP	[A/G]	AB	BB	BB	BB	BB	AB	AB	AB
chr10_1809950_C_T	10	1809950	BOT	[T/C]	BB	BB	BB	BB	AB	BB	BB	BB
chr10_1812151_A_G	10	1812151	TOP	[A/G]	AA	AB	AB	AA	AB	AB	AB	AB
chr10_1871880_C_T	10	1871880	BOT	[T/C]	AB	AA	AA	AA	AB	AB	AA	AA
chr10_1889028_A_G	10	1889028	TOP	[A/G]	AB	AA	AA	AA	AA	AB	AA	AA
chr10_1900530_C_T	10	1900530	TOP	[A/G]	AB	BB	BB	BB	BB	AB	BB	BB
chr10_193770_A_G	10	193770	TOP	[A/G]	AA	AA	AA	AA	AB	AA	AA	AA
chr10_1940300_A_G	10	1940300	TOP	[A/G]	BB	BB	BB	AB	BB	BB	AB	BB
chr10_1989600_G_T	10	1989600	TOP	[A/C]	AB	AB	AB	AB	AB	AB	BB	AB
chr10_1998463_A_G	10	1998463	BOT	[T/C]	AB	AB	AA	AB	AB	AB	BB	AB
chr10_2044634_C_T	10	2044634	BOT	[T/C]	BB	BB	BB	BB	BB	BB	AB	BB
chr10_2061894_C_T	10	2061894	BOT	[T/C]	BB	AB	BB	BB	AB	BB	BB	BB
chr10_208152_C_T	10	208152	TOP	[A/G]	AA	NC	NC	NC	NC	AA	BB	BB
chr10_2095152_C_T	10	2095152	BOT	[T/C]	AA	AB	AB	AA	AA	AB	AA	AB
chr10_2126851_C_T	10	2126851	BOT	[T/C]	AA	AB	AA	AA	AB	AA	AB	AB
chr10_2127485_A_G	10	2127485	BOT	[T/C]	BB	BB	BB	BB	BB	BB	AB	BB
chr10_2131774_C_T	10	2131774	BOT	[T/C]	BB	AB	AB	BB	BB	AB	BB	BB
chr10_2330562_C_T	10	2330562	BOT	[T/C]	AA	AA	AA	AA	AA	AA	AA	AB
chr10_2361917_C_T	10	2361917	BOT	[T/C]	AA	AA	AA	AB	AA	AA	AB	AA
chr10_2435910_C_T	10	2435910	BOT	[T/C]	AA	BB	AB	AB	AB	AB	BB	AB
chr10_2446322_A_G	10	2446322	BOT	[T/C]	AB	AA	AB	AB	AB	AA	AA	AB
chr10_2473876_C_T	10	2473876	BOT	[T/C]	BB	BB	BB	BB	BB	BB	AB	BB
chr10_2475344_A_G	10	2475344	TOP	[A/G]	AA	AA	AB	AB	AB	AA	AA	AB
chr10_2509058_C_T	10	2509058	BOT	[T/C]	BB	BB	BB	AB	BB	BB	AB	BB
chr10_2513521_A_G	10	2513521	TOP	[A/G]	AB	AB	AB	AA	AA	AB	AA	AB
chr10_2541068_G_T	10	2541068	TOP	[A/C]	AA	AB	AB	AA	AA	AB	AA	AA
chr10_2571405_C_T	10	2571405	TOP	[A/G]	BB	BB	BB	BB	BB	BB	BB	AB
chr10_2590369_A_G	10	2590369	TOP	[A/G]	AA	AB	BB	AB	AB	AB	AA	AB
chr10_2606228_A_G	10	2606228	TOP	[A/G]	AB	BB	BB	BB	BB	BB	BB	BB
chr10_2637728_A_G	10	2637728	BOT	[T/C]	AB	AB	AA	AB	AB	AB	AB	BB
chr10_2665139_A_G	10	2665139	TOP	[A/G]	AB	BB	BB	BB	BB	AB	BB	AA
chr10_266633_C_T	10	266633	BOT	[T/C]	AA	AB	AA	AA	AB	AA	AB	AA
chr10_2671493_A_C	10	2671493	TOP	[A/C]	AA	AB	AA	AB	AB	AA	AB	AA
chr10_268859_C_T	10	268859	TOP	[A/G]	AA	AB	AA	AA	AB	AA	AB	AA
chr10_2730976_C_T	10	2730976	BOT	[T/C]	AB	AB	BB	AB	AA	AB	AA	BB
chr10_2743802_A_G	10	2743802	TOP	[A/G]	BB	AB	AA	AB	BB	AB	BB	AA
chr10_2773664_C_T	10	2773664	BOT	[T/C]	AB	AB	AA	AB	AA	AA	AB	AA
chr10_2796254_C_T	10	2796254	BOT	[T/C]	BB	AB	AA	AB	AA	AB	AB	AA
chr10_2808199_A_C	10	2808199	TOP	[A/C]	AA	AB	AA	AB	AA	AA	AB	AA
chr10_2860636_C_T	10	2860636	TOP	[A/G]	AA	AB	AA	AB	AA	AA	AB	AA
chr10_2892377_C_T	10	2892377	TOP	[A/G]	BB	AB	AA	AB	BB	AB	BB	AB
chr10_2924682_A_C	10	2924682	TOP	[A/C]	BB	AB	AA	AB	BB	AB	AB	AA
chr10_2956149_A_G	10	2956149	TOP	[A/G]	AB	AB	BB	AB	BB	AB	AB	BB
chr10_2974888_G_T	10	2974888	TOP	[A/C]	BB	AB	BB	AB	BB	BB	AB	BB
chr10_2988887_A_G	10	2988887	TOP	[A/G]	AA	AB	AA	AB	AA	AA	AB	AA
chr10_3019420_G_T	10	3019420	TOP	[A/C]	AA	AB	AB	AA	AA	AB	AA	AB
chr10_304933_A_G	10	304933	BOT	[T/C]	BB	AA	AA	AA	AA	AB	AA	AA
chr10_3052090_A_G	10	3052090	BOT	[T/C]	AA	AA	AA	AA	BB	AA	NC	AB
chr10_3053663_A_G	10	3053663	BOT	[T/C]	AA	AA	AA	AA	BB	AA	AB	BB
chr10_3075827_G_T	10	3075827	TOP	[A/C]	AB	AB	AB	AA	AA	BB	AA	AA
chr10_3117522_A_C	10	3117522	TOP	[A/C]	AA	AB	AA	AB	AA	AA	AB	AA
chr10_3128251_G_T	10	3128251	TOP	[A/C]	BB	BB	BB	BB	BB	BB	AB	AB
chr10_3129889_C_T	10	3129889	BOT	[T/C]	BB	AB	BB	AB	AA	BB	AB	AB
chr10_3149377_C_T	10	3149377	TOP	[A/G]	AB	AB	AB	AA	BB	BB	AB	BB
chr10_3182199_A_G	10	3182199	BOT	[T/C]	BB	AB	BB	BB	BB	BB	BB	BB
chr10_3211248_A_G	10	3211248	TOP	[A/G]	BB	BB	BB	BB	BB	BB	BB	AB
chr10_3212222_A_G	10	3212222	BOT	[T/C]	AA	AB	AA	AB	AA	AA	AB	BB
chr10_3242681_A_C	10	3242681	TOP	[A/C]	AA	AA	AB	AB	AA	AA	AA	AB
chr10_3272656_C_T	10	3272656	BOT	[T/C]	AB	BB	BB	BB	AB	BB	BB	AB
chr10_3277577_A_G	10	3277577	TOP	[A/G]	AA	AA	AA	AA	AA	AA	AA	AB
chr10_3311360_A_G	10	3311360	TOP	[A/G]	AB	AB	AB	BB	BB	AA	BB	BB
chr10_3340446_G_T	10	3340446	BOT	[T/G]	BB	BB	BB	BB	AB	BB	BB	AB
chr10_335252_G_T	10	335252	BOT	[T/G]	AA	AB	BB	BB	AA	AB	AA	AB
chr10_3364716_A_G	10	3364716	BOT	[T/C]	AB	AB	BB	AB	AA	BB	AB	AA
chr10_3369931_A_G	10	3369931	TOP	[A/G]	AB	AB	BB	AB	BB	BB	AB	BB
chr10_3405119_A_G	10	3405119	TOP	[A/G]	AA	AA	AA	AA	AA	AA	AA	AB
chr10_345360_C_T	10	345360	TOP	[A/G]	BB	BB	BB	BB	AB	BB	AB	AB
chr10_3512412_C_T	10	3512412	TOP	[A/G]	AB	AB	AA	AB	BB	AA	AB	AA
chr10_3539536_C_T	10	3539536	TOP	[A/G]	AB	AB	AB	BB	BB	AA	BB	AA
chr10_3565911_A_G	10	3565911	TOP	[A/G]	AB	AB	AB	BB	BB	AA	BB	BB
chr10_3594848_A_G	10	3594848	BOT	[T/C]	BB	AB	BB	BB	BB	BB	BB	BB
chr10_3627571_A_C	10	3627571	TOP	[A/C]	AB	AB	AB	BB	AB	AA	BB	AB
chr10_3657504_A_C	10	3657504	TOP	[A/C]	AB	BB	BB	AB	BB	BB	AB	BB
chr10_367201_A_G	10	367201	TOP	[A/G]	AA	AA	AA	AA	AA	AA	AB	AA
chr10_3675684_A_C	10	3675684	BOT	[T/G]	AB	AB	AB	BB	AA	AA	AB	AB
chr10_3722750_C_T	10	3722750	TOP	[A/G]	AA	AA	AA	AA	BB	AA	AB	AA
chr10_3787704_C_T	10	3787704	BOT	[T/C]	AB	AB	AB	AA	AB	BB	AB	BB
chr10_3813472_C_T	10	3813472	BOT	[T/C]	AB	AB	AA	AB	AA	AA	AB	AA
chr10_3854024_C_T	10	3854024	TOP	[A/G]	AB	AA	AB	AB	AA	AB	AA	AA
chr10_3883611_C_T	10	3883611	BOT	[T/C]	AB	BB	AB	AB	BB	AB	BB	BB
chr10_3895536_C_T	10	3895536	BOT	[T/C]	AB	AA	AB	AB	AA	AB	AA	AA
chr10_3950232_G_T	10	3950232	TOP	[A/C]	AA	AA	AB	BB	AA	AA	AB	AA
chr10_3977483_C_T	10	3977483	TOP	[A/G]	AA	AA	AB	AB	AB	AA	AB	AA
chr10_3980896_C_T	10	3980896	BOT	[T/C]	AB	BB	BB	BB	BB	BB	BB	BB
chr10_4012498_A_G	10	4012498	TOP	[A/G]	BB	BB	BB	BB	NC	BB	BB	BB
chr10_4026578_A_G	10	4026578	BOT	[T/C]	BB	BB	BB	BB	AB	BB	AB	BB
chr10_4036320_A_C	10	4036320	BOT	[T/G]	AA	AA	AA	AA	AA	AA	NC	AB
chr10_4037020_C_T	10	4037020	BOT	[T/C]	AB	BB	BB	BB	BB	BB	BB	BB
chr10_4083113_C_T	10	4083113	BOT	[T/C]	BB	AA	BB	AB	BB	BB	AB	BB
chr10_4232058_A_C	10	4232058	TOP	[A/C]	AB	AA	AA	AA	AA	AA	AA	AB
chr10_424856_C_T	10	424856	BOT	[T/C]	BB	AA	AA	AB	AB	AB	AA	AB
chr10_426579_A_G	10	426579	TOP	[A/G]	AA	AB	AA	AA	AB	AA	AA	AA
chr10_4480348_C_T	10	4480348	TOP	[A/G]	AA	AB	BB	AB	AA	AB	AA	BB
chr10_4494943_C_T	10	4494943	BOT	[T/C]	AB	BB	AB	AB	AA	AB	AB	AB
chr10_4496668_C_T	10	4496668	TOP	[A/G]	AB	BB	BB	BB	AA	AB	AB	AB
chr10_4528943_C_T	10	4528943	TOP	[A/G]	AB	BB	BB	BB	AA	AB	AB	AB
chr10_4529333_A_G	10	4529333	BOT	[T/C]	AB	AA	AA	AA	AA	AB	AA	AB
chr10_4554068_A_G	10	4554068	TOP	[A/G]	AB	BB	BB	BB	BB	AB	BB	BB
chr10_4578499_G_T	10	4578499	TOP	[A/C]	BB	AA	AA	AA	BB	AB	AB	AB
chr10_4609600_A_G	10	4609600	TOP	[A/G]	AB	BB	BB	AB	BB	BB	AB	BB
chr10_4618778_A_G	10	4618778	BOT	[T/C]	AB	BB	BB	AB	BB	BB	AB	BB
chr10_462198_A_C	10	462198	BOT	[T/G]	AA	BB	BB	BB	AB	AB	BB	BB
chr10_4646126_A_C	10	4646126	TOP	[A/C]	AB	AB	AA	AB	AB	AA	AB	AB
chr10_4676045_C_T	10	4676045	BOT	[T/C]	AA	AB	AA	AA	AA	AA	AA	AB
chr10_4682746_C_T	10	4682746	BOT	[T/C]	AA	AB	AA	AA	AA	AA	AA	AB
chr10_4716067_C_T	10	4716067	BOT	[T/C]	AB	AA	AB	AB	BB	AB	AA	AA
chr10_4778848_C_T	10	4778848	TOP	[A/G]	BB	BB	BB	AB	AB	BB	AA	AB
chr10_4780849_A_G	10	4780849	BOT	[T/C]	BB	BB	BB	BB	AB	BB	AB	BB
chr10_4832746_G_T	10	4832746	BOT	[T/G]	BB	BB	BB	AB	BB	BB	AB	AB
chr10_4844940_A_G	10	4844940	TOP	[A/G]	BB	BB	BB	AB	BB	BB	AB	AB
chr10_4876135_C_T	10	4876135	BOT	[T/C]	BB	BB	BB	BB	BB	BB	BB	AB
chr10_4910704_A_G	10	4910704	TOP	[A/G]	BB	BB	AB	AB	AB	BB	AB	AB
chr10_4910784_G_T	10	4910784	TOP	[A/C]	BB	AA	AA	AA	AA	AB	AA	AB
chr10_4937142_C_T	10	4937142	TOP	[A/G]	AA	BB	BB	BB	AA	AB	AB	AB
chr10_495152_A_G	10	495152	TOP	[A/G]	BB	AB	AA	AA	AB	AB	AB	AA
chr10_4970395_C_T	10	4970395	BOT	[T/C]	AA	BB	BB	BB	AB	AB	AB	AA
chr10_5001002_A_G	10	5001002	BOT	[T/C]	AA	BB	BB	BB	AA	AB	AB	AA
chr10_5033489_A_G	10	5033489	TOP	[A/G]	BB	AB	AA	AB	BB	AB	BB	BB
chr10_5060619_C_T	10	5060619	BOT	[T/C]	AB	AA	AA	AA	AB	AA	AB	BB
chr10_5070085_A_C	10	5070085	BOT	[T/G]	AA	NC	NC	NC	AA	AA	AA	NC
chr10_5097896_C_T	10	5097896	TOP	[A/G]	AB	AA	AA	AA	AA	AB	AA	BB
chr10_5115392_C_T	10	5115392	TOP	[A/G]	BB	BB	AB	AB	BB	BB	BB	BB
chr10_5225229_A_G	10	5225229	TOP	[A/G]	BB	AA	AA	AA	BB	AB	AB	BB
chr10_5252431_C_T	10	5252431	TOP	[A/G]	AA	BB	BB	BB	AA	AB	BB	AA
chr10_5293732_C_T	10	5293732	TOP	[A/G]	AA	AA	AB	AB	BB	AA	AB	AA
chr10_5301567_A_G	10	5301567	BOT	[T/C]	BB	BB	BB	BB	AA	BB	NC	BB
chr10_5323092_A_C	10	5323092	BOT	[T/G]	BB	BB	BB	BB	BB	BB	AB	BB
chr10_5356065_C_T	10	5356065	BOT	[T/C]	AB	AB	AB	AB	AA	AB	AA	AB
chr10_5356171_C_T	10	5356171	BOT	[T/C]	AA	AB	AB	AB	AA	AB	AB	AA
chr10_5443253_C_T	10	5443253	BOT	[T/C]	AB	BB	BB	BB	BB	AB	AB	BB
chr10_5448274_A_G	10	5448274	TOP	[A/G]	AA	AA	AA	AA	AA	AA	AB	AB
chr10_5451509_A_G	10	5451509	TOP	[A/G]	AB	BB	BB	BB	AA	AB	BB	AB
chr10_5451601_A_G	10	5451601	BOT	[T/C]	AA	AA	AA	AA	AB	AA	AA	AA
chr10_5482314_C_T	10	5482314	TOP	[A/G]	AA	AB	AA	AA	AA	AA	AA	AA
chr10_5528828_A_G	10	5528828	TOP	[A/G]	AB	BB	AB	AB	AA	AB	BB	AA
chr10_5600150_A_G	10	5600150	BOT	[T/C]	BB	BB	BB	BB	BB	BB	AB	BB
chr10_5613996_C_T	10	5613996	TOP	[A/G]	BB	BB	BB	BB	BB	BB	AB	BB
chr10_5655380_A_G	10	5655380	BOT	[T/C]	AB	BB	BB	BB	BB	BB	AB	BB
chr10_5666735_A_G	10	5666735	TOP	[A/G]	BB	BB	BB	BB	BB	BB	AB	BB
chr10_5669968_C_T	10	5669968	BOT	[T/C]	AB	BB	BB	BB	BB	BB	NC	BB
chr10_5701693_A_C	10	5701693	TOP	[A/C]	BB	BB	AB	AB	BB	BB	BB	BB
chr10_606244_C_T	10	606244	TOP	[A/G]	AA	AB	AA	AB	BB	AA	BB	AB
chr10_606618_A_G	10	606618	BOT	[T/C]	BB	AB	BB	AB	AB	BB	AA	AB
chr10_6300775_C_T	10	6300775	BOT	[T/C]	AB	AB	AB	AB	BB	AB	AB	BB
chr10_6309328_G_T	10	6309328	BOT	[T/G]	AB	AA	AA	AA	AA	AB	AB	BB
chr10_6339461_C_T	10	6339461	BOT	[T/C]	BB	AA	AB	AB	BB	AB	AB	BB
chr10_6376335_C_T	10	6376335	BOT	[T/C]	BB	AB	AB	AB	BB	AB	AB	AB
chr10_6377505_C_T	10	6377505	TOP	[A/G]	AB	AB	AB	AB	BB	AA	AB	AB
chr10_6436168_A_C	10	6436168	TOP	[A/C]	BB	BB	BB	BB	AA	BB	BB	AB
chr10_6438693_A_C	10	6438693	TOP	[A/C]	AA	AA	AA	AA	AA	AA	AA	AB
chr10_647749_A_G	10	647749	BOT	[T/C]	AB	BB	BB	BB	BB	BB	AB	BB
chr10_647851_A_G	10	647851	TOP	[A/G]	AB	AB	AB	AA	AA	AB	AB	AB
chr10_6482366_C_T	10	6482366	TOP	[A/G]	BB	AB	AB	AB	BB	AB	AB	BB
chr10_6508729_A_G	10	6508729	TOP	[A/G]	AB	BB	BB	BB	AA	BB	AB	AB
chr10_6531480_A_C	10	6531480	TOP	[A/C]	AB	BB	AB	AB	AA	AB	BB	BB
chr10_6553269_A_G	10	6553269	TOP	[A/G]	AA	AA	AA	AA	AA	AA	AB	AA
chr10_6611349_A_G	10	6611349	BOT	[T/C]	AB	BB	BB	BB	AA	BB	BB	AB
chr10_6611923_C_T	10	6611923	BOT	[T/C]	AA	AB	BB	BB	AA	AB	AB	AB
chr10_6632621_A_G	10	6632621	BOT	[T/C]	AA	AA	AA	AA	AA	AA	AB	AA
chr10_6664020_A_G	10	6664020	BOT	[T/C]	AA	AA	AA	AA	BB	AA	AB	AA
chr10_6692589_A_C	10	6692589	BOT	[T/G]	AB	BB	AB	AB	AA	AB	AB	AA
chr10_6695801_A_C	10	6695801	TOP	[A/C]	AB	BB	BB	BB	BB	AB	AB	AB
chr10_6726486_G_T	10	6726486	BOT	[T/G]	AB	AB	AB	AA	AA	AB	AB	AA
chr10_6736646_C_T	10	6736646	TOP	[A/G]	AA	AB	AA	AA	AA	AA	AA	AA
chr10_6760060_A_G	10	6760060	BOT	[T/C]	AA	AA	AA	AA	BB	AA	NC	AB
chr10_6762356_C_T	10	6762356	BOT	[T/C]	AA	AA	AA	AA	AA	AA	AA	AB
chr10_6788406_A_G	10	6788406	TOP	[A/G]	AB	AB	AB	BB	BB	AB	AB	BB
chr10_6826760_A_G	10	6826760	BOT	[T/C]	BB	BB	BB	AB	BB	BB	BB	BB
chr10_6838110_G_T	10	6838110	TOP	[A/C]	AA	AA	AA	AB	BB	AA	AA	AB
chr10_6886739_G_T	10	6886739	BOT	[T/G]	BB	AB	BB	BB	BB	BB	AB	BB
chr10_6918652_G_T	10	6918652	TOP	[A/C]	BB	BB	BB	BB	BB	BB	AB	AB
chr10_6919630_C_T	10	6919630	TOP	[A/G]	AA	AB	AA	AA	AA	AA	AA	AA
chr10_6953308_A_C	10	6953308	TOP	[A/C]	BB	AB	BB	BB	BB	BB	BB	BB
chr10_6983262_A_C	10	6983262	TOP	[A/C]	BB	AB	BB	BB	BB	BB	BB	BB
chr10_6983685_C_T	10	6983685	TOP	[A/G]	AB	BB	BB	AB	BB	AB	BB	AB
chr10_7047947_A_G	10	7047947	BOT	[T/C]	AB	BB	BB	BB	BB	BB	BB	BB
chr10_7048551_G_T	10	7048551	BOT	[T/G]	BB	BB	BB	AB	BB	BB	BB	BB
chr10_7079509_A_G	10	7079509	TOP	[A/G]	AB	AB	AB	BB	AA	AB	AA	AB
chr10_7079753_C_T	10	7079753	TOP	[A/G]	AA	AB	AB	AA	NC	AB	BB	AA
chr10_7113532_A_G	10	7113532	BOT	[T/C]	AB	BB	BB	AB	AA	AB	AB	AA
chr10_7114727_G_T	10	7114727	TOP	[A/C]	AB	BB	BB	AB	NC	AB	AB	AA
chr10_7242933_C_T	10	7242933	BOT	[T/C]	AB	BB	BB	AB	AB	AB	AB	AB
chr10_7368147_A_G	10	7368147	TOP	[A/G]	AB	BB	BB	AB	BB	AB	BB	AB
chr10_737166_A_C	10	737166	BOT	[T/G]	AA	AA	AA	AA	AA	AA	AB	AA
chr10_7396243_C_T	10	7396243	TOP	[A/G]	AB	BB	BB	AB	AB	AB	AB	AB
chr10_7398134_A_G	10	7398134	TOP	[A/G]	AB	BB	BB	AB	BB	AB	AB	AB
chr10_7409372_A_C	10	7409372	BOT	[T/G]	AB	BB	BB	BB	BB	AB	BB	AB
chr10_7426153_A_G	10	7426153	TOP	[A/G]	AB	AB	BB	AB	AA	AB	AB	AB
chr10_7540036_G_T	10	7540036	BOT	[T/G]	AA	AA	AA	AA	BB	AA	AA	AA
chr10_7567030_G_T	10	7567030	BOT	[T/G]	AB	BB	BB	BB	BB	AB	BB	AA
chr10_757046_C_T	10	757046	TOP	[A/G]	BB	AA	AA	AA	AB	AB	AA	AA
chr10_7591151_C_T	10	7591151	BOT	[T/C]	AB	AB	BB	AB	AA	AB	AB	BB
chr10_7615145_G_T	10	7615145	TOP	[A/C]	AA	AA	AA	AA	BB	AA	AA	AA
chr10_7623020_C_T	10	7623020	TOP	[A/G]	BB	BB	BB	BB	BB	BB	BB	AA
chr10_7769984_G_T	10	7769984	BOT	[T/G]	AB	BB	BB	BB	BB	AB	AB	AA
chr10_7781163_C_T	10	7781163	BOT	[T/C]	AB	AB	AA	AB	BB	AB	AB	BB
chr10_782226_C_T	10	782226	TOP	[A/G]	AB	BB	BB	BB	AB	AB	BB	BB
chr10_7850445_G_T	10	7850445	BOT	[T/G]	BB	BB	BB	AB	BB	BB	BB	BB
chr10_7853263_A_G	10	7853263	TOP	[A/G]	BB	BB	BB	AB	AA	BB	AB	BB
chr10_7951628_A_G	10	7951628	TOP	[A/G]	AB	BB	BB	AB	AA	AB	BB	AA
chr10_7982877_A_G	10	7982877	BOT	[T/C]	BB	BB	BB	AB	BB	BB	BB	AA
chr10_8011843_G_T	10	8011843	BOT	[T/G]	AA	AA	AA	AB	BB	AA	AA	AB
chr10_8013843_G_T	10	8013843	BOT	[T/G]	AA	BB	BB	AB	AA	AB	AB	AA
chr10_8039314_A_G	10	8039314	TOP	[A/G]	AA	AA	AA	AB	AA	AA	AA	AB
chr10_804389_A_G	10	804389	TOP	[A/G]	AB	AA	AA	AA	AA	AB	AA	AA
chr10_8079001_C_T	10	8079001	TOP	[A/G]	AB	BB	BB	BB	BB	AB	AB	AB
chr10_8099875_A_G	10	8099875	BOT	[T/C]	AB	AA	AA	AA	AA	AA	AA	AA
chr10_810967_A_G	10	810967	TOP	[A/G]	AB	AB	AA	AB	AB	AA	AA	AB
chr10_8131422_C_T	10	8131422	TOP	[A/G]	AA	AB	AA	AA	BB	AA	AB	AA
chr10_8168155_C_T	10	8168155	TOP	[A/G]	AB	AA	AA	AB	BB	AB	AB	BB
chr10_8198035_A_G	10	8198035	TOP	[A/G]	AB	BB	BB	AB	AA	AB	AB	AA
chr10_822389_A_C	10	822389	TOP	[A/C]	AA	AA	AA	AA	AB	AA	AA	AA
chr10_8231359_A_C	10	8231359	BOT	[T/G]	AB	AA	AA	AB	AB	AB	AB	BB
chr10_8241011_A_G	10	8241011	BOT	[T/C]	AB	BB	BB	AB	BB	AB	AB	AA
chr10_8322760_C_T	10	8322760	TOP	[A/G]	AB	BB	BB	BB	BB	BB	BB	BB
chr10_8359314_C_T	10	8359314	BOT	[T/C]	BB	AB	BB	AB	AA	BB	AB	AB
chr10_8386992_C_T	10	8386992	BOT	[T/C]	BB	BB	BB	BB	AB	BB	BB	BB
chr10_8422711_A_C	10	8422711	BOT	[T/G]	AA	NC	NC	AA	BB	AA	AA	AA
chr10_8437963_C_T	10	8437963	BOT	[T/C]	BB	AB	BB	BB	BB	BB	BB	BB
chr10_846945_C_T	10	846945	TOP	[A/G]	BB	AB	AB	BB	BB	AB	BB	AA
chr10_875320_A_G	10	875320	BOT	[T/C]	AB	BB	BB	BB	BB	AB	BB	BB
chr10_875970_A_G	10	875970	BOT	[T/C]	AB	BB	BB	BB	AB	AB	AB	BB
chr10_8796965_A_G	10	8796965	BOT	[T/C]	BB	AB	AA	AB	BB	AB	AB	AB
chr10_8834696_C_T	10	8834696	BOT	[T/C]	AB	AA	AA	AB	BB	AB	AB	AB
chr10_8922806_C_T	10	8922806	TOP	[A/G]	AB	AA	AA	AB	BB	AB	AB	AB
chr10_8967409_C_T	10	8967409	BOT	[T/C]	BB	BB	BB	AB	BB	BB	BB	AB
chr10_8993108_G_T	10	8993108	TOP	[A/C]	AB	AB	AA	AB	BB	AB	AB	AB
chr10_9008544_G_T	10	9008544	BOT	[T/G]	AB	BB	BB	AB	BB	AB	AB	AB
chr10_9040704_A_G	10	9040704	TOP	[A/G]	AB	AB	BB	AB	AA	AB	AB	AB
chr10_9138202_G_T	10	9138202	TOP	[A/C]	AB	AA	AA	AB	BB	AB	AB	AB
chr10_918773_C_T	10	918773	BOT	[T/C]	AA	BB	BB	BB	BB	AB	AB	BB
chr10_948810_C_T	10	948810	BOT	[T/C]	BB	AB	AB	AB	AB	BB	BB	BB
chr10_966761_C_T	10	966761	BOT	[T/C]	BB	AB	BB	BB	AB	BB	BB	BB
chr10_9706111_C_T	10	9706111	TOP	[A/G]	AB	BB	BB	BB	BB	AB	BB	BB
chr10_972744_C_T	10	972744	TOP	[A/G]	BB	AB	AA	AA	BB	AB	AA	AB
chr10_9738777_C_T	10	9738777	TOP	[A/G]	AA	AA	AA	AB	AA	AA	AA	AB
chr10_9750173_G_T	10	9750173	TOP	[A/C]	BB	NC	NC	BB	NC	BB	NC	BB
chr10_9753142_A_G	10	9753142	TOP	[A/G]	AA	AB	BB	AB	AB	AB	AB	AB
chr10_9937031_A_G	10	9937031	TOP	[A/G]	AB	BB	BB	AB	AB	AB	BB	AB
chr10_9954434_A_G	10	9954434	BOT	[T/C]	AA	AB	BB	AB	AA	AB	AB	AB
chr10_9990090_C_T	10	9990090	BOT	[T/C]	AB	AB	AB	AB	BB	AB	AB	AB
chr10_random_147138_A_C	10_RANDOM	147138	TOP	[A/C]	AB	BB	AB	AB	AB	AB	AB	AB
chr10_random_157581_A_C	10_RANDOM	157581	TOP	[A/C]	AA	AA	AA	AB	AA	AA	AA	AA
chr10_random_169297_A_G	10_RANDOM	169297	BOT	[T/C]	BB	AB	AB	BB	BB	AB	BB	AB
chr10_random_189247_A_G	10_RANDOM	189247	TOP	[A/G]	BB	AB	AB	AB	BB	AB	BB	BB
chr10_random_210196_A_C	10_RANDOM	210196	TOP	[A/C]	AA	AB	AA	AB	AB	AA	AA	AA
chr10_random_218605_A_C	10_RANDOM	218605	TOP	[A/C]	AB	BB	BB	BB	BB	AB	BB	AB
chr10_random_230170_C_T	10_RANDOM	230170	BOT	[T/C]	BB	AB	AA	AB	BB	AB	AB	BB
chr10_random_233796_G_T	10_RANDOM	233796	TOP	[A/C]	BB	AB	AA	AB	AB	AB	AB	BB
chr10_random_249601_A_G	10_RANDOM	249601	TOP	[A/G]	BB	AB	BB	AB	AA	BB	AB	AB
chr10_random_271584_A_G	10_RANDOM	271584	TOP	[A/G]	BB	BB	BB	AB	BB	BB	BB	BB
chr10_random_311334_A_G	10_RANDOM	311334	TOP	[A/G]	AA	AB	AA	AA	AB	AA	AB	AB
chr10_random_322098_A_G	10_RANDOM	322098	TOP	[A/G]	BB	AB	BB	BB	AB	BB	BB	BB
chr10_random_328404_G_T	10_RANDOM	328404	TOP	[A/C]	BB	AB	AA	AB	BB	AB	AB	AB
chr10_random_383417_C_T	10_RANDOM	383417	BOT	[T/C]	BB	AB	AB	AB	BB	AB	AB	AB
chr10_random_386016_C_T	10_RANDOM	386016	BOT	[T/C]	AA	AB	AB	AB	AA	AB	AB	AB
chr10_random_399354_A_C	10_RANDOM	399354	BOT	[T/G]	AB	AB	AB	AB	AB	AB	BB	AB
chr10_random_424495_C_T	10_RANDOM	424495	TOP	[A/G]	AA	AA	AA	AA	AB	AA	AA	AA
chr10_random_427301_A_C	10_RANDOM	427301	BOT	[T/G]	AA	AB	AB	AB	AA	AB	NC	AB
chr10_random_441974_A_G	10_RANDOM	441974	TOP	[A/G]	AB	AB	AB	AB	AA	AB	AA	AB
chr10_random_450408_A_G	10_RANDOM	450408	BOT	[T/C]	BB	BB	BB	AB	AB	BB	BB	AB
chr10_random_46623_C_T	10_RANDOM	46623	BOT	[T/C]	BB	AB	BB	BB	AB	BB	AB	BB
chr10_random_467328_C_T	10_RANDOM	467328	TOP	[A/G]	AB	AB	AB	AB	BB	AB	AA	AB
chr10_random_53932_C_T	10_RANDOM	53932	BOT	[T/C]	AB	AB	AA	AB	BB	AB	BB	AA
chr10_random_67014_C_T	10_RANDOM	67014	BOT	[T/C]	BB	BB	AB	AB	BB	BB	BB	BB
chr10_random_8699_C_T	10_RANDOM	8699	BOT	[T/C]	AA	AA	AB	BB	AB	AA	AA	AA
chr10_random_88207_A_G	10_RANDOM	88207	TOP	[A/G]	AA	AB	AB	AB	BB	AA	AB	AA
chr10_random_97379_A_C	10_RANDOM	97379	TOP	[A/C]	BB	AB	AB	BB	BB	AB	BB	AB
chr11_1004248_C_T	11	1004248	TOP	[A/G]	BB	BB	AB	AB	AB	BB	BB	BB
chr11_1037383_G_T	11	1037383	BOT	[T/G]	AB	AA	AA	AA	AA	AB	AB	AA
chr11_1040832_C_T	11	1040832	BOT	[T/C]	BB	BB	AB	AB	AB	BB	BB	BB
chr11_10997423_C_T	11	10997423	TOP	[A/G]	BB	AB	AB	AB	BB	BB	BB	BB
chr11_11002850_G_T	11	11002850	BOT	[T/G]	AB	AB	AA	AA	AB	AB	AB	AB
chr11_11005008_A_G	11	11005008	TOP	[A/G]	AA	AA	AB	AB	AA	AA	AA	AA
chr11_1107814_C_T	11	1107814	BOT	[T/C]	AB	BB	AB	AB	AB	AB	AB	BB
chr11_1145276_A_C	11	1145276	TOP	[A/C]	AB	BB	AB	AB	AB	AB	AB	BB
chr11_116731_A_G	11	116731	TOP	[A/G]	AB	AB	AA	AB	BB	AB	AB	BB
chr11_12229561_A_G	11	12229561	TOP	[A/G]	AB	AA	AB	BB	AA	AB	AB	AB
chr11_12230467_A_G	11	12230467	BOT	[T/C]	BB	AB	BB	BB	NC	BB	BB	AB
chr11_12447797_C_T	11	12447797	BOT	[T/C]	AA	AB	AA	AA	AA	AA	AA	AA
chr11_12448245_A_G	11	12448245	BOT	[T/C]	AB	BB	AB	AA	BB	AB	AB	AB
chr11_12460087_A_G	11	12460087	TOP	[A/G]	AB	BB	AB	AA	BB	AB	AB	AB
chr11_12738570_A_C	11	12738570	TOP	[A/C]	AB	AB	AB	AA	AB	AB	AB	AB
chr11_12742308_A_G	11	12742308	BOT	[T/C]	AA	AA	AA	AA	AA	AA	AB	AA
chr11_12783607_A_G	11	12783607	BOT	[T/C]	AB	BB	BB	AB	BB	BB	AB	BB
chr11_13089577_A_G	11	13089577	BOT	[T/C]	BB	AB	BB	BB	BB	BB	BB	BB
chr11_13089931_A_G	11	13089931	TOP	[A/G]	AA	AA	AA	AA	AB	AA	AA	AA
chr11_13091724_C_T	11	13091724	BOT	[T/C]	AB	AB	AB	AA	AB	AB	AB	AB
chr11_13133614_A_G	11	13133614	TOP	[A/G]	AB	AB	AB	AB	AA	AB	AB	AB
chr11_13427136_A_G	11	13427136	TOP	[A/G]	AB	AA	AB	BB	AA	AB	AB	AB
chr11_1343142_G_T	11	1343142	BOT	[T/G]	AB	BB	AB	AB	AB	AB	AB	BB
chr11_13438160_C_T	11	13438160	BOT	[T/C]	BB	BB	BB	AB	BB	BB	BB	BB
chr11_13503544_C_T	11	13503544	BOT	[T/C]	AA	AB	AA	AA	BB	AA	AA	AB
chr11_13528390_A_G	11	13528390	TOP	[A/G]	AA	AB	AA	AA	AB	AA	AA	AB
chr11_13547630_C_T	11	13547630	BOT	[T/C]	BB	AB	BB	BB	AB	BB	BB	AB
chr11_13554844_A_G	11	13554844	BOT	[T/C]	BB	AB	BB	BB	BB	BB	BB	AB
chr11_13641743_A_G	11	13641743	TOP	[A/G]	AB	AB	BB	BB	AB	BB	BB	AB
chr11_13661309_A_G	11	13661309	BOT	[T/C]	BB	BB	BB	BB	BB	BB	BB	AB
chr11_13697672_A_G	11	13697672	TOP	[A/G]	BB	AB	BB	BB	BB	BB	BB	AB
chr11_1370629_A_G	11	1370629	TOP	[A/G]	AB	BB	BB	BB	BB	AB	AB	BB
chr11_13769913_A_G	11	13769913	BOT	[T/C]	AB	BB	BB	BB	AA	AB	AB	AA
chr11_13770978_C_T	11	13770978	BOT	[T/C]	BB	BB	BB	AB	AA	AB	AB	AB
chr11_13792859_C_T	11	13792859	BOT	[T/C]	AB	BB	BB	AB	AA	BB	BB	AB
chr11_13884418_A_C	11	13884418	TOP	[A/C]	AB	BB	AB	AA	AA	AB	AB	AB
chr11_13940324_C_T	11	13940324	BOT	[T/C]	AA	AA	AA	AB	AB	AB	AA	AB
chr11_13984534_A_G	11	13984534	BOT	[T/C]	BB	AB	BB	BB	BB	BB	BB	AB
chr11_13988995_A_G	11	13988995	BOT	[T/C]	AA	AA	AA	AA	AB	AA	AA	AA
chr11_13989387_A_G	11	13989387	TOP	[A/G]	BB	AB	BB	BB	BB	BB	BB	AB
chr11_14007564_A_G	11	14007564	BOT	[T/C]	AB	AB	AB	BB	BB	AB	AB	BB
chr11_14074244_G_T	11	14074244	BOT	[T/G]	AB	AB	AA	AA	AB	AB	AB	BB
chr11_14080414_A_G	11	14080414	TOP	[A/G]	BB	BB	BB	BB	AB	BB	BB	AB
chr11_14111941_A_G	11	14111941	BOT	[T/C]	BB	BB	BB	BB	BB	BB	AB	BB
chr11_14151581_C_T	11	14151581	BOT	[T/C]	AA	AA	AB	AB	AA	AA	AB	AA
chr11_14175621_C_T	11	14175621	BOT	[T/C]	AB	AB	AA	AB	AA	AB	AA	BB
chr11_14218557_A_C	11	14218557	TOP	[A/C]	AB	AB	AB	AA	AA	AB	AB	AA
chr11_14218769_A_G	11	14218769	BOT	[T/C]	AA	AA	AA	AB	AB	AA	AA	AA
chr11_14277469_A_G	11	14277469	BOT	[T/C]	AB	AB	AB	AA	AA	AB	AB	AA
chr11_14304430_C_T	11	14304430	BOT	[T/C]	BB	BB	BB	AB	BB	BB	BB	BB
chr11_14312727_A_G	11	14312727	TOP	[A/G]	AB	AB	AB	AA	AB	AB	AB	AB
chr11_14315490_C_T	11	14315490	BOT	[T/C]	AB	AB	AB	AA	AA	AB	NC	AA
chr11_1446724_A_G	11	1446724	TOP	[A/G]	AB	BB	AB	AB	BB	AB	AB	BB
chr11_14521873_A_G	11	14521873	TOP	[A/G]	BB	BB	BB	BB	NC	AB	BB	AA
chr11_14535045_A_C	11	14535045	BOT	[T/G]	AB	AB	AB	AA	AA	AB	AB	AA
chr11_14584381_C_T	11	14584381	BOT	[T/C]	AB	AA	AB	BB	AB	AB	NC	AB
chr11_14624796_A_G	11	14624796	BOT	[T/C]	AA	NC	AA	AB	AA	AA	AA	AA
chr11_14664234_A_G	11	14664234	TOP	[A/G]	BB	BB	BB	BB	BB	AB	BB	AB
chr11_14689872_A_G	11	14689872	BOT	[T/C]	AA	AA	AB	AB	AA	AA	AB	AA
chr11_1471534_A_G	11	1471534	TOP	[A/G]	AB	BB	BB	BB	BB	AB	AB	BB
chr11_1471893_C_T	11	1471893	TOP	[A/G]	AB	AA	AA	AA	AB	AB	AB	AA
chr11_14755720_C_T	11	14755720	TOP	[A/G]	AB	AB	AB	AA	AA	AB	AB	AA
chr11_14779997_C_T	11	14779997	BOT	[T/C]	AB	AA	AB	BB	AA	AB	AB	BB
chr11_14838294_C_T	11	14838294	BOT	[T/C]	BB	BB	BB	BB	AB	BB	BB	BB
chr11_14858516_C_T	11	14858516	TOP	[A/G]	AB	AB	AB	AA	AA	AB	AB	AA
chr11_14860698_C_T	11	14860698	BOT	[T/C]	AB	AA	AB	BB	AA	AB	NC	AB
chr11_14892995_G_T	11	14892995	BOT	[T/G]	AA	AB	AA	AA	AA	AA	AA	AB
chr11_14928583_A_G	11	14928583	BOT	[T/C]	AA	AB	AA	AA	AB	AA	AA	AB
chr11_14962357_A_G	11	14962357	TOP	[A/G]	AB	AB	AB	AA	AA	AB	AB	AA
chr11_15064080_A_G	11	15064080	BOT	[T/C]	AA	AB	AA	AA	AB	AA	AA	AB
chr11_15064610_C_T	11	15064610	TOP	[A/G]	AB	AB	AB	AA	AA	AB	AB	AA
chr11_15163714_G_T	11	15163714	BOT	[T/G]	BB	AB	BB	BB	AB	BB	BB	AB
chr11_15173204_A_C	11	15173204	BOT	[T/G]	BB	AB	BB	BB	BB	BB	BB	AB
chr11_15190187_C_T	11	15190187	TOP	[A/G]	AB	AA	AA	AB	AA	AA	AB	AA
chr11_1547466_C_T	11	1547466	TOP	[A/G]	BB	BB	AB	AB	BB	BB	BB	BB
chr11_1548729_C_T	11	1548729	BOT	[T/C]	BB	BB	AB	AB	BB	BB	BB	BB
chr11_15609360_C_T	11	15609360	BOT	[T/C]	BB	AB	BB	BB	AA	BB	BB	AB
chr11_15623395_A_G	11	15623395	TOP	[A/G]	BB	BB	BB	BB	BB	AB	BB	AB
chr11_15623525_A_G	11	15623525	TOP	[A/G]	AA	AA	AA	AA	AA	AB	AA	AB
chr11_15653490_C_T	11	15653490	BOT	[T/C]	AA	AA	AB	BB	AA	AB	AA	BB
chr11_15715454_A_C	11	15715454	BOT	[T/G]	AB	AB	AB	AA	AB	AB	BB	AA
chr11_15810611_A_G	11	15810611	TOP	[A/G]	AA	AA	AA	AB	AA	AB	AA	AB
chr11_15848286_A_G	11	15848286	BOT	[T/C]	BB	AB	AB	AA	AA	AB	NC	AA
chr11_1589316_A_G	11	1589316	BOT	[T/C]	BB	BB	AB	AB	BB	BB	BB	BB
chr11_15913359_C_T	11	15913359	BOT	[T/C]	BB	BB	AB	AB	BB	AB	BB	AB
chr11_15938143_A_G	11	15938143	TOP	[A/G]	AB	AA	AA	AB	AA	AA	AA	AA
chr11_15961490_A_C	11	15961490	BOT	[T/G]	AB	AA	AA	AB	AB	AB	AB	AB
chr11_15980126_A_G	11	15980126	TOP	[A/G]	AB	AB	AB	BB	AB	AB	AB	AB
chr11_16015640_C_T	11	16015640	BOT	[T/C]	AB	BB	AB	AA	AB	AB	AB	AB
chr11_16043080_A_G	11	16043080	BOT	[T/C]	AB	BB	AB	AA	AB	AB	AB	AB
chr11_16060210_C_T	11	16060210	BOT	[T/C]	BB	BB	AB	AA	AB	BB	AB	BB
chr11_16084253_A_G	11	16084253	TOP	[A/G]	BB	BB	BB	BB	BB	BB	BB	AB
chr11_16115037_A_G	11	16115037	BOT	[T/C]	AB	BB	AB	AA	AB	BB	NC	BB
chr11_16164742_C_T	11	16164742	TOP	[A/G]	BB	NC	BB	BB	NC	NC	NC	NC
chr11_16185126_C_T	11	16185126	BOT	[T/C]	AB	BB	AB	AA	BB	BB	BB	BB
chr11_16253467_G_T	11	16253467	BOT	[T/G]	BB	BB	BB	AB	AB	BB	BB	BB
chr11_16289911_A_G	11	16289911	TOP	[A/G]	AB	BB	BB	BB	BB	BB	AB	BB
chr11_16292251_C_T	11	16292251	TOP	[A/G]	AB	BB	BB	AB	BB	BB	AB	BB
chr11_16391300_C_T	11	16391300	BOT	[T/C]	BB	BB	BB	AB	BB	BB	BB	BB
chr11_1642781_G_T	11	1642781	BOT	[T/G]	BB	BB	BB	BB	AB	BB	BB	BB
chr11_164410_C_T	11	164410	TOP	[A/G]	AB	AB	BB	AB	AB	AB	AB	AA
chr11_16467412_C_T	11	16467412	TOP	[A/G]	AB	AA	AA	AB	AB	AA	AB	AA
chr11_16483294_A_G	11	16483294	TOP	[A/G]	AB	AA	AA	AB	AB	AA	AB	AA
chr11_16505598_G_T	11	16505598	TOP	[A/C]	AB	AB	BB	AB	BB	BB	AB	BB
chr11_1651451_A_G	11	1651451	BOT	[T/C]	AB	AA	AA	AA	AA	AB	AB	AA
chr11_16602378_C_T	11	16602378	BOT	[T/C]	BB	BB	BB	AB	AB	BB	BB	BB
chr11_16613346_C_T	11	16613346	BOT	[T/C]	AB	AA	AA	AB	AA	AA	NC	AB
chr11_16614171_A_G	11	16614171	BOT	[T/C]	BB	BB	BB	BB	BB	BB	AA	BB
chr11_16651112_A_G	11	16651112	TOP	[A/G]	AB	AA	AB	BB	AA	AB	AA	AB
chr11_16692590_C_T	11	16692590	BOT	[T/C]	AB	AA	AB	BB	AA	AB	AB	BB
chr11_16735544_A_G	11	16735544	TOP	[A/G]	AB	AA	AB	BB	AA	AB	AA	BB
chr11_16765358_G_T	11	16765358	BOT	[T/G]	AB	AB	AB	AB	BB	AB	BB	AA
chr11_16788923_A_G	11	16788923	BOT	[T/C]	AB	AA	AB	BB	AA	AB	AB	BB
chr11_16789282_G_T	11	16789282	BOT	[T/G]	AB	AA	AB	BB	AA	AB	AB	BB
chr11_16932395_C_T	11	16932395	BOT	[T/C]	AB	AA	AB	BB	AB	AB	AB	BB
chr11_16932446_A_G	11	16932446	BOT	[T/C]	AA	AA	AA	AA	AA	AA	AA	AB
chr11_16939701_A_G	11	16939701	TOP	[A/G]	AB	AA	AA	AA	AA	AA	AA	AA
chr11_16964505_A_G	11	16964505	TOP	[A/G]	AB	BB	BB	BB	BB	BB	BB	BB
chr11_1699474_C_T	11	1699474	BOT	[T/C]	AB	BB	BB	AB	BB	AB	AB	AB
chr11_17001696_C_T	11	17001696	TOP	[A/G]	AB	AA	AA	AA	AA	AA	AA	AA
chr11_17051504_C_T	11	17051504	BOT	[T/C]	AB	AA	AB	AB	AA	AB	BB	BB
chr11_17057652_A_G	11	17057652	TOP	[A/G]	AA	AA	AB	AB	AA	AB	AA	AB
chr11_17166783_G_T	11	17166783	TOP	[A/C]	AB	BB	BB	BB	BB	BB	BB	BB
chr11_17171486_G_T	11	17171486	BOT	[T/G]	AA	AB	AB	AB	AA	AB	AB	AB
chr11_1719115_C_T	11	1719115	TOP	[A/G]	AB	BB	BB	AB	BB	AB	AB	AB
chr11_17240520_A_G	11	17240520	TOP	[A/G]	AB	BB	BB	BB	BB	BB	BB	BB
chr11_17273895_A_G	11	17273895	BOT	[T/C]	AB	BB	BB	BB	BB	BB	BB	BB
chr11_17275118_A_G	11	17275118	BOT	[T/C]	AB	AB	AB	AB	AB	AA	AB	AA
chr11_17280905_C_T	11	17280905	TOP	[A/G]	AA	AB	AB	AA	AA	AA	AA	AA
chr11_17344939_C_T	11	17344939	TOP	[A/G]	AB	AB	AB	BB	AB	AB	AB	BB
chr11_17356237_G_T	11	17356237	BOT	[T/G]	AB	AB	AB	BB	AB	AB	NC	BB
chr11_17362073_C_T	11	17362073	TOP	[A/G]	AA	AB	AB	AB	AA	AB	AA	BB
chr11_17451665_A_G	11	17451665	TOP	[A/G]	AB	BB	BB	AB	BB	BB	BB	BB
chr11_1758956_C_T	11	1758956	TOP	[A/G]	AB	AA	AA	AA	AA	AB	AB	AA
chr11_17604530_G_T	11	17604530	BOT	[T/G]	AB	AA	AA	AA	AA	AA	AB	AA
chr11_17614467_A_G	11	17614467	TOP	[A/G]	BB	BB	BB	BB	BB	BB	AB	BB
chr11_17647517_C_T	11	17647517	BOT	[T/C]	AB	AA	AA	AA	AB	AA	AB	AA
chr11_17689058_A_G	11	17689058	BOT	[T/C]	BB	AB	AA	AB	BB	AB	BB	AB
chr11_17710544_C_T	11	17710544	BOT	[T/C]	BB	AB	AA	AA	BB	AB	BB	AB
chr11_17716126_A_C	11	17716126	BOT	[T/G]	BB	BB	NC	AA	BB	BB	BB	BB
chr11_17744978_A_G	11	17744978	BOT	[T/C]	AA	BB	BB	BB	AB	AB	AB	AB
chr11_17795007_A_G	11	17795007	BOT	[T/C]	AA	BB	BB	BB	BB	AB	AB	BB
chr11_17851029_C_T	11	17851029	BOT	[T/C]	AA	AA	AA	AB	AA	AA	AA	AB
chr11_17886920_G_T	11	17886920	BOT	[T/G]	AA	AA	AA	AA	BB	BB	NC	AB
chr11_17926031_G_T	11	17926031	BOT	[T/G]	BB	BB	BB	AB	BB	BB	BB	BB
chr11_18044796_G_T	11	18044796	BOT	[T/G]	AB	AA	AA	AB	AA	AA	AB	AB
chr11_18057143_C_T	11	18057143	BOT	[T/C]	AB	AA	AA	AB	AA	AA	BB	AB
chr11_1811149_A_G	11	1811149	TOP	[A/G]	AB	BB	BB	AB	BB	AB	AB	AB
chr11_18119869_G_T	11	18119869	BOT	[T/G]	AB	AA	AA	AA	AB	AB	AB	AA
chr11_18121830_G_T	11	18121830	TOP	[A/C]	BB	AB	BB	BB	AB	AB	BB	AB
chr11_18152805_C_T	11	18152805	TOP	[A/G]	AA	AB	AA	AA	AB	AB	AA	AB
chr11_18159344_A_G	11	18159344	BOT	[T/C]	AB	BB	BB	BB	BB	BB	AB	BB
chr11_18193179_C_T	11	18193179	BOT	[T/C]	AB	AA	AA	AA	AA	AA	AB	AA
chr11_1820630_C_T	11	1820630	TOP	[A/G]	AB	BB	BB	AB	BB	AB	AB	AB
chr11_18226816_A_G	11	18226816	TOP	[A/G]	AA	BB	BB	AB	BB	AB	AA	BB
chr11_18262109_C_T	11	18262109	BOT	[T/C]	AA	AB	AB	AA	AA	AA	AA	AA
chr11_18295660_C_T	11	18295660	TOP	[A/G]	BB	AB	AB	BB	AB	BB	BB	BB
chr11_18318407_A_C	11	18318407	TOP	[A/C]	AA	BB	BB	AB	BB	AB	AA	BB
chr11_18362654_C_T	11	18362654	BOT	[T/C]	AA	BB	BB	NC	NC	AA	AA	NC
chr11_18372364_G_T	11	18372364	BOT	[T/G]	BB	AB	AB	AB	AB	AB	BB	AA
chr11_18428521_C_T	11	18428521	TOP	[A/G]	AB	AB	AB	AB	AA	AB	AB	AA
chr11_18465794_A_G	11	18465794	BOT	[T/C]	BB	AB	AB	AB	BB	BB	BB	BB
chr11_18475918_C_T	11	18475918	TOP	[A/G]	AA	BB	BB	AB	BB	AB	AA	BB
chr11_18500434_C_T	11	18500434	BOT	[T/C]	AA	AB	AB	AB	BB	AA	AA	AA
chr11_18535972_C_T	11	18535972	TOP	[A/G]	AB	AA	AA	AA	AA	AB	AB	AA
chr11_1855220_C_T	11	1855220	BOT	[T/C]	AB	AA	AA	AA	AA	AB	AB	AA
chr11_18581050_A_G	11	18581050	TOP	[A/G]	BB	BB	BB	AB	BB	BB	BB	BB
chr11_18632685_C_T	11	18632685	BOT	[T/C]	BB	AB	AB	BB	BB	BB	BB	BB
chr11_18709541_A_G	11	18709541	TOP	[A/G]	AA	AB	AB	AA	AA	AA	AA	AA
chr11_18709626_A_C	11	18709626	BOT	[T/G]	AB	AA	AA	AB	AA	AB	AB	AA
chr11_18800800_G_T	11	18800800	TOP	[A/C]	AA	AA	AA	AA	AB	NC	AA	NC
chr11_18812572_C_T	11	18812572	BOT	[T/C]	AB	AA	AA	AA	AA	AA	AB	AA
chr11_18875384_C_T	11	18875384	TOP	[A/G]	AB	BB	BB	BB	AB	AB	AB	BB
chr11_18907256_A_G	11	18907256	TOP	[A/G]	AB	AB	AB	BB	AA	BB	AB	BB
chr11_18941891_G_T	11	18941891	TOP	[A/C]	BB	AB	AB	AB	BB	AB	BB	NC
chr11_18971504_C_T	11	18971504	BOT	[T/C]	AA	AB	AA	AA	AA	AB	AA	AB
chr11_19032965_C_T	11	19032965	BOT	[T/C]	AB	AA	AA	AB	AA	AA	AB	AA
chr11_19043698_C_T	11	19043698	TOP	[A/G]	BB	AA	AB	BB	AA	BB	BB	BB
chr11_19109656_A_C	11	19109656	BOT	[T/G]	AB	BB	BB	BB	BB	AB	AB	BB
chr11_19123627_C_T	11	19123627	BOT	[T/C]	AB	BB	BB	AB	BB	AA	AB	AB
chr11_19209689_A_G	11	19209689	TOP	[A/G]	NC	AB	AB	AB	BB	AA	NC	AB
chr11_1921957_C_T	11	1921957	TOP	[A/G]	AB	BB	BB	AB	BB	AB	AB	AB
chr11_19235777_C_T	11	19235777	BOT	[T/C]	AB	AB	AB	AB	BB	AB	AB	BB
chr11_19236103_A_C	11	19236103	BOT	[T/G]	AB	AA	AA	AB	AB	AA	AB	AB
chr11_1928891_C_T	11	1928891	BOT	[T/C]	AB	AA	AA	AB	AA	AB	AB	AB
chr11_19306558_A_G	11	19306558	TOP	[A/G]	AB	AA	AA	AB	AA	AB	AB	AB
chr11_19346335_A_G	11	19346335	BOT	[T/C]	AA	AB	AA	AA	AA	AA	AA	AA
chr11_19350926_A_C	11	19350926	BOT	[T/G]	AB	AB	AA	AA	AA	AA	AB	AA
chr11_19382066_C_T	11	19382066	TOP	[A/G]	AB	BB	AB	AB	NC	AB	AB	BB
chr11_193941_A_G	11	193941	TOP	[A/G]	AB	AB	AA	AB	BB	AB	AB	BB
chr11_19427512_A_G	11	19427512	TOP	[A/G]	AB	AA	AA	AA	AA	AB	AB	AA
chr11_19454806_C_T	11	19454806	BOT	[T/C]	BB	BB	AB	AB	BB	BB	BB	BB
chr11_19456691_A_G	11	19456691	TOP	[A/G]	AB	AA	AA	AA	AA	AB	AB	AA
chr11_19479099_C_T	11	19479099	BOT	[T/C]	BB	BB	AB	AB	AA	BB	BB	BB
chr11_1958663_A_G	11	1958663	TOP	[A/G]	AA	BB	BB	AB	AA	AA	AB	AA
chr11_19684066_A_G	11	19684066	BOT	[T/C]	BB	AB	AB	BB	BB	BB	BB	BB
chr11_19692807_C_T	11	19692807	BOT	[T/C]	AB	BB	BB	AB	BB	BB	AB	AB
chr11_19725569_C_T	11	19725569	TOP	[A/G]	BB	AB	AB	BB	BB	BB	BB	BB
chr11_2026530_C_T	11	2026530	TOP	[A/G]	BB	AA	AA	AB	BB	BB	AB	BB
chr11_2028061_A_G	11	2028061	TOP	[A/G]	AB	BB	BB	AB	AA	AB	BB	AA
chr11_2091211_C_T	11	2091211	BOT	[T/C]	BB	BB	BB	AB	BB	BB	BB	AB
chr11_2122850_C_T	11	2122850	BOT	[T/C]	BB	AA	AA	AB	BB	BB	AB	BB
chr11_2194786_A_C	11	2194786	TOP	[A/C]	BB	AB	AA	AB	BB	BB	AB	BB
chr11_221180_A_G	11	221180	BOT	[T/C]	AB	AB	BB	AB	AA	AB	AB	AA
chr11_2269259_A_G	11	2269259	BOT	[T/C]	AA	BB	BB	BB	AA	AA	BB	AB
chr11_2269675_C_T	11	2269675	BOT	[T/C]	BB	AA	AA	AB	BB	BB	AB	BB
chr11_2287439_C_T	11	2287439	BOT	[T/C]	AA	AB	AA	AB	AA	AA	AA	AB
chr11_2331700_C_T	11	2331700	BOT	[T/C]	AA	BB	BB	AB	AA	AA	AB	AA
chr11_2357393_A_G	11	2357393	TOP	[A/G]	BB	AA	AA	AA	BB	BB	AB	AB
chr11_2366648_A_G	11	2366648	TOP	[A/G]	BB	AB	AA	AB	BB	BB	AB	BB
chr11_2434237_A_C	11	2434237	BOT	[T/G]	BB	AA	AA	AB	BB	BB	AB	BB
chr11_2466738_A_G	11	2466738	BOT	[T/C]	AA	AB	BB	AB	AA	AA	AB	AA
chr11_2535684_C_T	11	2535684	BOT	[T/C]	AA	AB	AA	AB	AA	AA	AA	AB
chr11_2568420_C_T	11	2568420	TOP	[A/G]	AA	AB	AA	AA	AA	AA	AA	AA
chr11_2576841_A_G	11	2576841	TOP	[A/G]	AB	BB	BB	AB	AA	AB	AB	AA
chr11_2603871_A_G	11	2603871	TOP	[A/G]	AB	AA	AA	AA	AA	AB	AA	AA
chr11_2639353_A_G	11	2639353	BOT	[T/C]	AB	AA	AA	AA	AA	AB	AA	AA
chr11_2682506_A_G	11	2682506	TOP	[A/G]	AB	AA	AA	AA	BB	AA	AB	AA
chr11_2709117_A_G	11	2709117	TOP	[A/G]	BB	AB	BB	AB	BB	BB	BB	AB
chr11_2741080_C_T	11	2741080	TOP	[A/G]	AB	AB	AA	AB	BB	AA	AA	AB
chr11_2775277_A_C	11	2775277	BOT	[T/G]	BB	AB	AA	AA	BB	AB	AB	AA
chr11_2841764_C_T	11	2841764	TOP	[A/G]	AB	AA	AA	AA	AA	AB	AB	AA
chr11_2880203_C_T	11	2880203	BOT	[T/C]	AB	AA	AA	AA	BB	AA	AA	AA
chr11_288770_A_G	11	288770	BOT	[T/C]	AB	AB	AA	AB	BB	AB	NC	BB
chr11_2911480_A_G	11	2911480	BOT	[T/C]	AA	NC	NC	AA	AA	NC	NC	AA
chr11_2943678_C_T	11	2943678	TOP	[A/G]	AB	AB	AA	AA	AA	AB	AB	AA
chr11_3012630_A_C	11	3012630	TOP	[A/C]	BB	AB	BB	BB	BB	BB	BB	BB
chr11_3016530_C_T	11	3016530	BOT	[T/C]	BB	AA	AA	AA	AB	AB	AB	AA
chr11_3079313_A_G	11	3079313	TOP	[A/G]	AB	BB	BB	BB	AB	AB	BB	BB
chr11_3149631_C_T	11	3149631	TOP	[A/G]	AB	BB	BB	BB	AB	AB	BB	BB
chr11_3216681_A_G	11	3216681	BOT	[T/C]	AA	AB	BB	AB	AB	AB	AB	AB
chr11_322317_A_G	11	322317	BOT	[T/C]	BB	AB	AA	AB	BB	BB	BB	BB
chr11_3250111_A_G	11	3250111	TOP	[A/G]	AA	AB	BB	AB	AB	AA	AB	AA
chr11_3319204_A_G	11	3319204	TOP	[A/G]	AA	AB	BB	AB	AB	AA	AB	AA
chr11_3344330_C_T	11	3344330	TOP	[A/G]	AA	AB	BB	AB	AB	AA	AB	AA
chr11_3453486_C_T	11	3453486	TOP	[A/G]	BB	AB	AA	AA	AB	AB	AB	AA
chr11_3488659_C_T	11	3488659	BOT	[T/C]	AB	AB	AA	AB	AA	AB	AB	BB
chr11_3521933_C_T	11	3521933	BOT	[T/C]	BB	BB	BB	AB	BB	AB	BB	AA
chr11_3563901_C_T	11	3563901	BOT	[T/C]	BB	BB	BB	BB	AB	BB	BB	BB
chr11_3589765_C_T	11	3589765	TOP	[A/G]	AB	AB	AA	AA	AB	AA	AB	AA
chr11_359059_A_G	11	359059	TOP	[A/G]	AB	AB	BB	AB	AA	AB	AB	AA
chr11_3661147_A_G	11	3661147	BOT	[T/C]	AA	AB	BB	BB	AB	AA	AB	AB
chr11_3671480_G_T	11	3671480	TOP	[A/C]	AA	AA	AA	AA	AA	AB	AA	AB
chr11_3693100_A_C	11	3693100	BOT	[T/G]	AB	AA	AA	AA	AB	AB	AA	AA
chr11_3781637_A_G	11	3781637	BOT	[T/C]	AB	AB	AA	AA	AA	AB	AB	AB
chr11_3789377_A_G	11	3789377	BOT	[T/C]	BB	BB	BB	AB	BB	AB	BB	AA
chr11_3862923_A_G	11	3862923	BOT	[T/C]	AA	AA	AA	AA	AB	AA	AA	AA
chr11_3893552_A_G	11	3893552	TOP	[A/G]	BB	BB	BB	BB	AB	AB	BB	AB
chr11_3897239_A_G	11	3897239	TOP	[A/G]	BB	BB	BB	BB	AB	AB	BB	AB
chr11_3932187_A_G	11	3932187	TOP	[A/G]	AA	AB	BB	BB	AB	AB	AB	BB
chr11_3966129_A_G	11	3966129	BOT	[T/C]	AB	AA	AA	AA	AA	AB	AA	AA
chr11_4001706_A_C	11	4001706	TOP	[A/C]	AB	AB	BB	BB	AB	BB	BB	BB
chr11_4038420_C_T	11	4038420	TOP	[A/G]	AB	AB	AA	AA	AB	AB	AB	AB
chr11_4137446_A_G	11	4137446	TOP	[A/G]	AB	AB	AA	AA	AA	AA	AA	AA
chr11_4202072_G_T	11	4202072	BOT	[T/G]	BB	AB	AA	AB	BB	BB	AB	BB
chr11_4233528_A_G	11	4233528	BOT	[T/C]	AA	AA	AA	AB	AA	AA	AA	AB
chr11_4237910_A_G	11	4237910	TOP	[A/G]	AB	BB	BB	BB	AB	AB	BB	BB
chr11_4271098_A_C	11	4271098	TOP	[A/C]	AB	AB	AA	AA	AA	AB	AA	AB
chr11_427464_C_T	11	427464	TOP	[A/G]	AB	BB	AB	AB	AB	AB	AB	BB
chr11_4341014_C_T	11	4341014	BOT	[T/C]	AA	AA	AA	AA	AA	AB	AA	AB
chr11_4373399_A_C	11	4373399	BOT	[T/G]	BB	BB	BB	BB	AB	AB	BB	AB
chr11_4423658_C_T	11	4423658	BOT	[T/C]	AA	AA	AA	AA	BB	AA	AB	AA
chr11_4468557_A_C	11	4468557	BOT	[T/G]	BB	BB	BB	BB	BB	AB	BB	AB
chr11_4476380_C_T	11	4476380	TOP	[A/G]	AB	BB	BB	BB	AB	AA	BB	AA
chr11_4503869_A_G	11	4503869	TOP	[A/G]	AA	AA	AA	AA	AB	AB	AA	AB
chr11_4528599_G_T	11	4528599	BOT	[T/G]	AB	BB	BB	BB	BB	AB	BB	BB
chr11_459506_G_T	11	459506	TOP	[A/C]	AA	AA	AA	AA	AB	AA	AA	AA
chr11_4692733_C_T	11	4692733	BOT	[T/C]	AB	AB	AA	AA	AA	AA	AA	AA
chr11_4763607_A_G	11	4763607	BOT	[T/C]	BB	BB	BB	BB	AA	AB	BB	AB
chr11_4774036_A_G	11	4774036	TOP	[A/G]	BB	BB	BB	BB	AB	BB	BB	BB
chr11_4816235_C_T	11	4816235	BOT	[T/C]	AA	AA	AA	AB	AB	AB	AA	BB
chr11_4841337_A_G	11	4841337	TOP	[A/G]	AA	AB	AA	AA	AA	AA	AB	AA
chr11_4885995_A_G	11	4885995	BOT	[T/C]	BB	AB	AA	AA	AA	AB	AB	AA
chr11_4918265_C_T	11	4918265	TOP	[A/G]	BB	BB	BB	BB	AB	BB	BB	BB
chr11_4928633_A_C	11	4928633	TOP	[A/C]	BB	BB	BB	BB	BB	BB	AB	BB
chr11_493263_A_G	11	493263	TOP	[A/G]	AB	BB	AB	AB	AB	AB	AB	BB
chr11_494510_A_C	11	494510	TOP	[A/C]	AB	BB	AB	AB	BB	AB	AB	BB
chr11_494633_G_T	11	494633	BOT	[T/G]	AB	BB	AB	AB	BB	AB	AB	BB
chr11_4953898_G_T	11	4953898	TOP	[A/C]	AA	BB	BB	BB	BB	AB	AB	BB
chr11_5001665_A_G	11	5001665	TOP	[A/G]	AA	AB	AA	AB	AA	AB	AB	BB
chr11_5020655_C_T	11	5020655	TOP	[A/G]	AA	BB	BB	AB	BB	AB	AA	AB
chr11_5088655_A_G	11	5088655	TOP	[A/G]	AA	AB	AA	AB	AB	AB	AA	BB
chr11_5098085_A_G	11	5098085	BOT	[T/C]	BB	BB	BB	BB	AB	BB	BB	BB
chr11_51291_C_T	11	51291	BOT	[T/C]	AB	AB	AA	AB	AB	AB	AB	BB
chr11_5191310_C_T	11	5191310	TOP	[A/G]	BB	AB	AA	AB	BB	BB	BB	BB
chr11_5209732_A_G	11	5209732	TOP	[A/G]	BB	AA	AA	AB	AA	AB	BB	AB
chr11_5295818_C_T	11	5295818	BOT	[T/C]	AB	AB	AA	AA	AA	BB	AB	AB
chr11_5304035_C_T	11	5304035	BOT	[T/C]	AB	AB	AA	AA	AA	BB	AB	AB
chr11_53461_A_G	11	53461	BOT	[T/C]	AB	AB	AA	AB	BB	AB	AB	BB
chr11_5406647_A_C	11	5406647	BOT	[T/G]	BB	AB	BB	BB	AA	BB	AA	BB
chr11_5423801_C_T	11	5423801	TOP	[A/G]	BB	BB	BB	BB	AB	BB	BB	BB
chr11_5427850_A_G	11	5427850	BOT	[T/C]	BB	AB	BB	BB	AB	BB	AA	BB
chr11_5428771_A_G	11	5428771	TOP	[A/G]	BB	AB	BB	BB	BB	BB	AA	BB
chr11_5464268_A_G	11	5464268	TOP	[A/G]	AA	AA	AA	AA	AB	AA	AA	AA
chr11_5529057_G_T	11	5529057	TOP	[A/C]	AA	AB	AA	AA	AA	AA	BB	AA
chr11_5535789_C_T	11	5535789	BOT	[T/C]	AA	AB	AA	AA	AB	AA	AB	AA
chr11_559942_C_T	11	559942	BOT	[T/C]	AA	AA	AA	AA	AA	AA	NC	AA
chr11_5803520_C_T	11	5803520	BOT	[T/C]	BB	AB	AA	AB	BB	BB	BB	BB
chr11_5848049_A_C	11	5848049	TOP	[A/C]	AA	NC	NC	NC	BB	NC	BB	NC
chr11_5873119_C_T	11	5873119	TOP	[A/G]	AA	AB	AA	AA	AA	AA	AB	AA
chr11_5906760_A_G	11	5906760	TOP	[A/G]	BB	AB	BB	BB	BB	BB	AB	BB
chr11_5942540_A_G	11	5942540	TOP	[A/G]	AB	BB	BB	BB	BB	AB	BB	BB
chr11_5972589_C_T	11	5972589	BOT	[T/C]	AA	AA	AA	AB	AB	AB	AA	BB
chr11_6009292_C_T	11	6009292	BOT	[T/C]	BB	AB	AA	AB	BB	BB	BB	BB
chr11_603551_G_T	11	603551	TOP	[A/C]	BB	BB	BB	BB	BB	BB	BB	AB
chr11_6087165_A_G	11	6087165	BOT	[T/C]	BB	AB	AA	AA	AB	AB	AB	AA
chr11_6113236_C_T	11	6113236	BOT	[T/C]	AA	AB	BB	BB	BB	AB	NC	BB
chr11_6123747_A_G	11	6123747	TOP	[A/G]	AA	AA	AA	AA	AB	AA	AA	AA
chr11_6152568_C_T	11	6152568	BOT	[T/C]	BB	AA	AA	AB	AB	BB	BB	BB
chr11_6170462_C_T	11	6170462	BOT	[T/C]	AA	AA	AA	AB	AB	AB	AB	BB
chr11_6222549_C_T	11	6222549	BOT	[T/C]	AA	BB	BB	BB	BB	AB	AB	BB
chr11_6228551_C_T	11	6228551	TOP	[A/G]	BB	AB	BB	BB	BB	BB	AB	BB
chr11_6242067_C_T	11	6242067	BOT	[T/C]	BB	AB	BB	BB	BB	BB	AB	BB
chr11_6276342_C_T	11	6276342	BOT	[T/C]	AA	BB	BB	AB	AA	AA	BB	AA
chr11_6307500_G_T	11	6307500	TOP	[A/C]	AA	AB	BB	BB	BB	AB	BB	BB
chr11_6355580_C_T	11	6355580	BOT	[T/C]	AA	AB	AA	AA	AA	AA	AA	AA
chr11_6379199_C_T	11	6379199	TOP	[A/G]	AA	AA	AA	AB	BB	AA	AA	AB
chr11_6408203_G_T	11	6408203	BOT	[T/G]	BB	AB	BB	BB	BB	BB	BB	BB
chr11_6409009_A_G	11	6409009	TOP	[A/G]	AA	AB	AA	AA	AB	AB	BB	AB
chr11_6449647_C_T	11	6449647	TOP	[A/G]	BB	AB	BB	BB	BB	BB	BB	BB
chr11_6508249_G_T	11	6508249	TOP	[A/C]	NC	BB	BB	BB	AA	AA	NC	AA
chr11_6532215_A_G	11	6532215	BOT	[T/C]	BB	AB	BB	AB	AB	AB	AB	AA
chr11_6553116_C_T	11	6553116	TOP	[A/G]	BB	BB	BB	AB	AA	BB	AB	AB
chr11_6604388_C_T	11	6604388	TOP	[A/G]	NC	BB	BB	BB	BB	NC	BB	NC
chr11_6642121_A_G	11	6642121	TOP	[A/G]	BB	AB	AA	AB	BB	AB	AA	AB
chr11_664401_C_T	11	664401	BOT	[T/C]	AA	AA	AB	AB	AB	AB	AA	AB
chr11_6654405_G_T	11	6654405	TOP	[A/C]	BB	BB	BB	BB	BB	BB	AB	BB
chr11_6682075_C_T	11	6682075	BOT	[T/C]	BB	AB	AA	AA	AB	BB	AA	AB
chr11_6738348_C_T	11	6738348	BOT	[T/C]	AA	AA	AA	AA	AB	AA	AA	AA
chr11_6748533_G_T	11	6748533	BOT	[T/G]	AA	AA	AA	AB	AB	AA	AB	AB
chr11_6749504_C_T	11	6749504	TOP	[A/G]	AA	AA	AA	AB	AB	AA	AB	AB
chr11_6789582_A_G	11	6789582	TOP	[A/G]	BB	AB	AA	AB	BB	BB	BB	BB
chr11_6852926_A_G	11	6852926	TOP	[A/G]	BB	AB	AA	AB	BB	BB	AB	BB
chr11_6854344_C_T	11	6854344	BOT	[T/C]	AA	AB	BB	AB	AA	AA	AA	AA
chr11_6896059_C_T	11	6896059	TOP	[A/G]	BB	AB	AA	AB	BB	BB	BB	BB
chr11_6961857_G_T	11	6961857	BOT	[T/G]	BB	BB	BB	BB	BB	AB	AA	AB
chr11_6962404_C_T	11	6962404	BOT	[T/C]	BB	BB	BB	AB	AB	BB	BB	AB
chr11_6996729_C_T	11	6996729	TOP	[A/G]	BB	AB	AA	AA	AB	BB	BB	AB
chr11_7074066_A_C	11	7074066	BOT	[T/G]	AA	AA	AA	AA	AA	AB	AB	AB
chr11_7074152_C_T	11	7074152	BOT	[T/C]	AA	AA	AA	AA	AA	AB	AB	AB
chr11_7101553_C_T	11	7101553	BOT	[T/C]	AA	AA	AA	AB	AB	AA	AA	AB
chr11_712194_C_T	11	712194	TOP	[A/G]	AA	AA	AA	AA	AB	AA	AA	AA
chr11_731096_A_C	11	731096	TOP	[A/C]	AB	BB	AB	AB	BB	AB	AB	BB
chr11_7381147_A_C	11	7381147	BOT	[T/G]	AA	AA	AA	AA	AA	AA	NC	AA
chr11_7392841_A_G	11	7392841	BOT	[T/C]	AA	AB	BB	AB	AA	AA	AA	AA
chr11_7395331_G_T	11	7395331	TOP	[A/C]	AA	AB	AB	AA	AA	AA	AA	AA
chr11_7468446_G_T	11	7468446	TOP	[A/C]	BB	BB	BB	AB	AB	BB	BB	AB
chr11_7471346_A_G	11	7471346	TOP	[A/G]	BB	BB	BB	BB	AB	AB	BB	AB
chr11_7604263_G_T	11	7604263	BOT	[T/G]	BB	BB	BB	AB	AB	AB	AA	AA
chr11_7623774_C_T	11	7623774	TOP	[A/G]	AA	AA	AA	AB	AA	AB	BB	AB
chr11_766725_C_T	11	766725	BOT	[T/C]	AA	AA	AB	AB	AA	AA	AA	AA
chr11_7673741_C_T	11	7673741	TOP	[A/G]	BB	AA	AA	AA	AA	AB	AA	AA
chr11_7704120_C_T	11	7704120	BOT	[T/C]	AA	BB	BB	BB	BB	AB	BB	BB
chr11_7734781_A_G	11	7734781	TOP	[A/G]	AA	BB	AB	AB	BB	AB	AB	BB
chr11_7736240_C_T	11	7736240	BOT	[T/C]	BB	AA	AA	AA	AA	AB	AA	AA
chr11_7777927_A_G	11	7777927	TOP	[A/G]	AA	AB	BB	AB	AB	AA	AB	AB
chr11_7811683_A_G	11	7811683	TOP	[A/G]	AA	AB	AB	AA	AB	AA	AA	AA
chr11_7841231_C_T	11	7841231	TOP	[A/G]	BB	AA	AA	AA	AA	AB	AB	AB
chr11_7845154_C_T	11	7845154	TOP	[A/G]	AA	BB	BB	BB	BB	AB	AB	AB
chr11_7878292_A_G	11	7878292	TOP	[A/G]	AA	AA	AA	AA	AA	AA	AA	AB
chr11_7911752_A_G	11	7911752	TOP	[A/G]	BB	AB	AB	AB	BB	BB	BB	BB
chr11_7949614_C_T	11	7949614	BOT	[T/C]	BB	AB	BB	BB	BB	BB	BB	BB
chr11_7950024_A_G	11	7950024	BOT	[T/C]	NC	AB	AB	AB	AA	AA	AA	AA
chr11_7977159_A_G	11	7977159	TOP	[A/G]	BB	AB	AB	AB	AA	AB	AA	AA
chr11_799567_A_G	11	799567	TOP	[A/G]	AB	BB	AB	AB	BB	AB	AB	BB
chr11_8013750_G_T	11	8013750	BOT	[T/G]	BB	AB	BB	BB	BB	BB	BB	BB
chr11_8060670_A_G	11	8060670	TOP	[A/G]	AA	AB	AB	AA	AB	AA	AA	AB
chr11_8061781_C_T	11	8061781	BOT	[T/C]	AA	AB	AB	AB	AA	AA	AA	AA
chr11_8087877_C_T	11	8087877	TOP	[A/G]	BB	AB	BB	BB	BB	BB	BB	BB
chr11_8117847_C_T	11	8117847	BOT	[T/C]	AA	AB	AB	AA	AB	AA	AA	AA
chr11_816898_A_G	11	816898	TOP	[A/G]	AA	AA	AB	AB	AB	AA	AA	AA
chr11_8172173_A_G	11	8172173	TOP	[A/G]	BB	AB	AB	AA	AB	AB	AB	AB
chr11_8188962_C_T	11	8188962	BOT	[T/C]	AA	AB	AA	AA	AA	AA	AA	AA
chr11_8221768_A_G	11	8221768	BOT	[T/C]	AB	AB	AB	AA	AB	AA	AA	AB
chr11_8274598_G_T	11	8274598	BOT	[T/G]	AA	BB	BB	AA	BB	AA	AA	AA
chr11_8312343_G_T	11	8312343	TOP	[A/C]	AB	BB	AB	AB	BB	AB	AB	BB
chr11_8356983_A_C	11	8356983	BOT	[T/G]	AA	AB	AB	AB	AB	AB	AB	BB
chr11_8396799_A_C	11	8396799	BOT	[T/G]	BB	AB	AB	AB	AB	AB	AB	AA
chr11_8408125_A_C	11	8408125	BOT	[T/G]	AB	AB	AA	AA	AA	AB	BB	AA
chr11_8600622_G_T	11	8600622	BOT	[T/G]	AB	AA	AA	AA	AB	AB	AB	AA
chr11_8613276_A_G	11	8613276	TOP	[A/G]	BB	BB	BB	BB	BB	AB	BB	AB
chr11_8619278_A_C	11	8619278	TOP	[A/C]	BB	AB	BB	BB	BB	BB	BB	BB
chr11_8659062_C_T	11	8659062	BOT	[T/C]	AB	AA	AB	BB	AA	AB	NC	AA
chr11_8695651_C_T	11	8695651	BOT	[T/C]	BB	BB	BB	BB	AB	BB	BB	BB
chr11_8696747_A_G	11	8696747	TOP	[A/G]	AB	AA	AB	BB	AA	AB	AA	AA
chr11_8965575_C_T	11	8965575	TOP	[A/G]	BB	AA	AA	NC	AA	BB	AA	AB
chr11_8972924_C_T	11	8972924	BOT	[T/C]	AA	AB	AA	AA	AA	AA	AA	AA
chr11_9005416_A_G	11	9005416	BOT	[T/C]	AA	AB	AB	AB	AB	AA	AA	AA
chr11_9019592_C_T	11	9019592	TOP	[A/G]	AA	AA	AA	AB	AA	AA	AA	AA
chr11_902106_C_T	11	902106	BOT	[T/C]	AB	AA	AA	AA	AA	AB	AB	AA
chr11_9131853_C_T	11	9131853	TOP	[A/G]	AB	AA	AA	AA	AA	AB	AA	AB
chr11_9161865_C_T	11	9161865	TOP	[A/G]	AA	AB	AB	AB	AB	AB	AA	AB
chr11_9169404_G_T	11	9169404	TOP	[A/C]	AA	AA	AA	AA	AA	AA	AB	AA
chr11_936205_A_G	11	936205	TOP	[A/G]	AA	AA	AB	AB	AA	AA	AA	AA
chr11_9372008_A_G	11	9372008	BOT	[T/C]	AB	AA	AA	AA	AA	AB	NC	AA
chr11_9374846_A_G	11	9374846	BOT	[T/C]	AB	AA	AA	AB	AA	AB	AB	AB
chr11_9416626_A_G	11	9416626	BOT	[T/C]	AA	AB	AA	AA	AB	AA	AA	AB
chr11_9445683_C_T	11	9445683	BOT	[T/C]	AB	AB	AB	AB	AB	AB	AA	AB
chr11_9450135_A_C	11	9450135	TOP	[A/C]	AB	AB	AA	AA	AB	AB	AA	AB
chr11_9552012_G_T	11	9552012	TOP	[A/C]	BB	AB	BB	BB	AB	BB	BB	AB
chr11_9579744_A_G	11	9579744	BOT	[T/C]	AB	AB	BB	BB	AB	AB	BB	AB
chr11_9616260_A_C	11	9616260	TOP	[A/C]	BB	AB	BB	BB	AB	BB	BB	AB
chr11_9644687_A_C	11	9644687	BOT	[T/G]	BB	AB	AB	BB	AB	BB	AB	BB
chr11_9708036_C_T	11	9708036	BOT	[T/C]	AB	BB	AB	AB	BB	AB	AB	AB
chr11_9778751_G_T	11	9778751	TOP	[A/C]	AA	AB	AA	AA	BB	AA	AB	AB
chr11_9810150_A_G	11	9810150	BOT	[T/C]	BB	BB	BB	BB	BB	BB	AB	BB
chr11_9816477_C_T	11	9816477	BOT	[T/C]	AB	BB	BB	BB	BB	AB	BB	BB
chr11_9855734_C_T	11	9855734	TOP	[A/G]	AB	BB	BB	BB	BB	BB	BB	BB
chr11_9890467_C_T	11	9890467	BOT	[T/C]	AB	AB	BB	BB	BB	BB	BB	AB
chr11_9924874_C_T	11	9924874	BOT	[T/C]	AB	AB	BB	BB	AB	BB	BB	AB
chr11_9938458_A_C	11	9938458	BOT	[T/G]	AB	AB	BB	BB	AB	BB	BB	AB
chr11_random_114237_G_T	11_RANDOM	114237	BOT	[T/G]	AA	AB	AB	AA	AB	AA	NC	AA
chr11_random_115837_A_G	11_RANDOM	115837	TOP	[A/G]	AA	AA	AB	AB	AA	AB	AB	AB
chr11_random_130349_C_T	11_RANDOM	130349	BOT	[T/C]	BB	BB	AB	AB	BB	AB	AB	AB
chr11_random_138839_C_T	11_RANDOM	138839	BOT	[T/C]	BB	BB	AB	AB	BB	AB	AB	AB
chr11_random_156352_A_C	11_RANDOM	156352	BOT	[T/G]	AA	AB	AA	AB	AB	AA	AA	AB
chr11_random_170242_A_C	11_RANDOM	170242	TOP	[A/C]	AA	AA	AB	AB	AA	AB	AB	AB
chr11_random_181957_C_T	11_RANDOM	181957	BOT	[T/C]	AA	AA	AB	BB	AB	AB	AB	BB
chr11_random_21177_A_G	11_RANDOM	21177	BOT	[T/C]	AA	AA	AA	AA	AB	AB	AA	AB
chr11_random_232726_A_G	11_RANDOM	232726	BOT	[T/C]	AA	AA	AB	BB	AB	AA	AA	AB
chr11_random_254913_C_T	11_RANDOM	254913	BOT	[T/C]	NC	BB	NC	AA	AA	AA	AA	AA
chr11_random_267776_C_T	11_RANDOM	267776	TOP	[A/G]	BB	BB	BB	BB	BB	AB	AB	AB
chr11_random_6185_A_G	11_RANDOM	6185	TOP	[A/G]	BB	BB	BB	AB	AB	BB	BB	AB
chr11_random_65847_A_G	11_RANDOM	65847	BOT	[T/C]	AA	AA	AA	AA	AA	AA	AB	AA
chr11_random_74271_A_C	11_RANDOM	74271	TOP	[A/C]	AA	AA	AB	AB	AA	AB	AB	AB
chr11_random_79614_C_T	11_RANDOM	79614	BOT	[T/C]	BB	AB	AB	BB	AB	BB	AB	BB
chr11_random_89872_A_C	11_RANDOM	89872	TOP	[A/C]	AA	AA	AB	AB	AA	AB	AB	AB
chr12_10009320_C_T	12	10009320	TOP	[A/G]	AA	AA	AA	AB	AA	AA	AA	AA
chr12_10039283_A_G	12	10039283	TOP	[A/G]	BB	AB	AB	BB	BB	AB	BB	AB
chr12_10062628_C_T	12	10062628	BOT	[T/C]	AB	BB	BB	BB	AA	AB	BB	BB
chr12_10071854_G_T	12	10071854	TOP	[A/C]	BB	AB	AB	BB	BB	AB	AB	AB
chr12_10104228_A_C	12	10104228	BOT	[T/G]	AA	AB	AB	AA	AA	AB	NC	AB
chr12_10191333_A_G	12	10191333	TOP	[A/G]	AA	AA	AA	AA	AB	AA	AB	AA
chr12_10250626_G_T	12	10250626	TOP	[A/C]	AB	BB	AB	AA	BB	BB	AB	AB
chr12_1025214_C_T	12	1025214	BOT	[T/C]	AA	AB	AB	AB	AB	AB	AB	BB
chr12_10287698_C_T	12	10287698	TOP	[A/G]	AA	AA	AA	AA	AA	AA	AB	AA
chr12_10288929_G_T	12	10288929	TOP	[A/C]	AA	AB	BB	BB	AA	AB	AB	BB
chr12_10310590_C_T	12	10310590	BOT	[T/C]	AB	AB	AB	BB	AA	AB	BB	AB
chr12_1057784_C_T	12	1057784	TOP	[A/G]	AA	AA	AB	AB	AB	AB	AB	BB
chr12_1058332_A_G	12	1058332	TOP	[A/G]	AA	AB	AB	AB	BB	AB	AB	BB
chr12_1089154_G_T	12	1089154	BOT	[T/G]	AA	AA	AB	AB	AB	AB	AB	BB
chr12_1112226_C_T	12	1112226	BOT	[T/C]	BB	AB	BB	BB	AA	AB	AA	AB
chr12_1114045_C_T	12	1114045	BOT	[T/C]	BB	AB	BB	BB	AA	AB	AA	AB
chr12_1131622_C_T	12	1131622	TOP	[A/G]	BB	AB	BB	BB	BB	BB	NC	BB
chr12_1145771_G_T	12	1145771	TOP	[A/C]	BB	AB	BB	BB	AB	BB	AB	BB
chr12_11579168_G_T	12	11579168	TOP	[A/C]	AB	AA	AA	AA	AA	AB	AA	AA
chr12_1180156_A_G	12	1180156	TOP	[A/G]	BB	AB	AB	AB	AB	BB	AB	AB
chr12_11985991_A_G	12	11985991	BOT	[T/C]	BB	AB	BB	BB	AB	BB	BB	BB
chr12_11995457_A_G	12	11995457	TOP	[A/G]	AA	AB	AB	AA	AA	AB	BB	AB
chr12_12015397_A_G	12	12015397	TOP	[A/G]	NC	BB	AB	AA	BB	BB	BB	AB
chr12_1210638_C_T	12	1210638	BOT	[T/C]	AA	AB	AA	AA	AB	AB	BB	AB
chr12_12132083_G_T	12	12132083	TOP	[A/C]	BB	AB	AB	AB	BB	BB	BB	AB
chr12_12318690_C_T	12	12318690	BOT	[T/C]	AB	AA	AA	AA	AA	AA	AA	AA
chr12_12326349_C_T	12	12326349	BOT	[T/C]	AB	AB	AB	AB	AA	AA	AB	AB
chr12_1241522_A_G	12	1241522	BOT	[T/C]	BB	BB	BB	BB	BB	BB	AB	BB
chr12_1253345_G_T	12	1253345	BOT	[T/G]	BB	AB	AB	AB	AB	BB	AB	AB
chr12_13098838_A_G	12	13098838	TOP	[A/G]	AA	BB	BB	AB	AA	AA	AA	AB
chr12_13106836_C_T	12	13106836	TOP	[A/G]	AA	AA	AA	AB	BB	AA	AA	AA
chr12_13125852_A_C	12	13125852	BOT	[T/G]	AA	BB	BB	AB	AA	AA	AA	AB
chr12_13195042_A_C	12	13195042	BOT	[T/G]	AB	AA	AA	AB	BB	BB	AB	AB
chr12_13201466_A_G	12	13201466	TOP	[A/G]	AA	BB	BB	AB	BB	AA	AA	AB
chr12_13224272_A_G	12	13224272	BOT	[T/C]	AB	AB	AB	AB	BB	AA	BB	AB
chr12_13286990_A_G	12	13286990	TOP	[A/G]	AB	BB	BB	BB	BB	AB	BB	BB
chr12_13318957_A_G	12	13318957	BOT	[T/C]	AB	BB	BB	BB	AA	AB	BB	BB
chr12_13363990_G_T	12	13363990	BOT	[T/G]	AA	AB	AA	AA	AB	AB	AA	AB
chr12_13458865_A_G	12	13458865	TOP	[A/G]	BB	AB	AA	AA	NC	AA	AA	AA
chr12_13460319_A_C	12	13460319	BOT	[T/G]	BB	AB	BB	BB	BB	BB	BB	BB
chr12_13501806_C_T	12	13501806	TOP	[A/G]	AB	AB	AA	AB	BB	AA	BB	AA
chr12_13557100_G_T	12	13557100	TOP	[A/C]	AB	AB	BB	AB	AA	BB	AA	BB
chr12_13584513_C_T	12	13584513	TOP	[A/G]	AB	BB	BB	BB	BB	NC	BB	AB
chr12_1364669_A_G	12	1364669	BOT	[T/C]	BB	BB	BB	BB	BB	BB	NC	NC
chr12_13797636_C_T	12	13797636	TOP	[A/G]	AB	AB	AA	AA	BB	AB	AA	AA
chr12_13861467_C_T	12	13861467	BOT	[T/C]	BB	BB	BB	AB	BB	BB	BB	BB
chr12_13873286_C_T	12	13873286	BOT	[T/C]	AB	AB	AB	AB	BB	AB	AB	AB
chr12_13903743_C_T	12	13903743	BOT	[T/C]	AB	NC	AB	AB	AA	AB	AB	AB
chr12_1393780_A_C	12	1393780	BOT	[T/G]	AA	AA	AB	AB	BB	AB	AB	BB
chr12_14045673_C_T	12	14045673	BOT	[T/C]	BB	AB	AB	AB	BB	AB	BB	AB
chr12_14056587_A_G	12	14056587	BOT	[T/C]	BB	AB	AB	BB	BB	AB	BB	AB
chr12_14106281_A_G	12	14106281	TOP	[A/G]	BB	AB	BB	BB	BB	BB	BB	BB
chr12_14127319_G_T	12	14127319	TOP	[A/C]	AB	BB	BB	BB	BB	AB	AA	BB
chr12_14163250_A_G	12	14163250	TOP	[A/G]	AB	BB	BB	AB	AA	BB	BB	BB
chr12_14173935_A_G	12	14173935	BOT	[T/C]	BB	AB	AB	BB	BB	AB	BB	AB
chr12_14206394_G_T	12	14206394	BOT	[T/G]	AB	AB	BB	AB	AA	BB	BB	BB
chr12_14214614_G_T	12	14214614	TOP	[A/C]	AB	AA	AB	AB	AA	AB	BB	AB
chr12_1423627_C_T	12	1423627	BOT	[T/C]	BB	BB	BB	BB	BB	BB	AB	BB
chr12_14250606_C_T	12	14250606	TOP	[A/G]	AB	AB	BB	BB	BB	AB	BB	BB
chr12_142586_A_G	12	142586	TOP	[A/G]	BB	AB	BB	BB	BB	BB	BB	BB
chr12_14271598_C_T	12	14271598	TOP	[A/G]	AB	AB	AB	AB	AA	AB	BB	AB
chr12_14294532_A_C	12	14294532	BOT	[T/G]	BB	BB	BB	AB	AA	BB	AA	BB
chr12_14332491_G_T	12	14332491	TOP	[A/C]	AA	AA	AA	AA	AA	AA	BB	AA
chr12_1434413_A_G	12	1434413	TOP	[A/G]	AA	AA	AA	AA	AA	AA	NC	AA
chr12_14396850_A_G	12	14396850	BOT	[T/C]	AB	BB	AB	AA	AA	BB	BB	AB
chr12_14425173_C_T	12	14425173	BOT	[T/C]	BB	AA	AB	BB	BB	AB	BB	AB
chr12_14425364_G_T	12	14425364	BOT	[T/G]	AB	BB	BB	BB	BB	AB	AA	BB
chr12_14435901_C_T	12	14435901	BOT	[T/C]	BB	BB	AB	AB	BB	BB	BB	AB
chr12_1444813_A_G	12	1444813	TOP	[A/G]	BB	AB	BB	BB	AB	BB	AB	BB
chr12_14651484_C_T	12	14651484	BOT	[T/C]	AB	AB	AB	AB	AA	AA	BB	AB
chr12_14656372_A_C	12	14656372	TOP	[A/C]	AB	AB	AB	AB	AB	AA	BB	AB
chr12_14656935_A_G	12	14656935	BOT	[T/C]	BB	BB	BB	AB	AA	BB	BB	BB
chr12_14701045_A_G	12	14701045	TOP	[A/G]	BB	BB	BB	AB	AA	BB	AA	BB
chr12_14755488_C_T	12	14755488	TOP	[A/G]	BB	AB	BB	AB	BB	BB	BB	BB
chr12_14760448_C_T	12	14760448	BOT	[T/C]	BB	BB	BB	BB	AB	BB	BB	BB
chr12_14772544_C_T	12	14772544	BOT	[T/C]	AA	AB	AA	AB	AA	AA	AA	AA
chr12_14785144_C_T	12	14785144	TOP	[A/G]	BB	AA	AB	AB	AA	AB	AA	AB
chr12_14790358_A_G	12	14790358	TOP	[A/G]	AA	AB	AB	AA	AA	AB	AA	AB
chr12_1484385_C_T	12	1484385	TOP	[A/G]	AA	AB	AA	AA	AA	AA	AB	AA
chr12_14863957_C_T	12	14863957	BOT	[T/C]	BB	AB	AB	BB	BB	AB	BB	AB
chr12_14864312_C_T	12	14864312	TOP	[A/G]	AA	AB	AB	AA	AA	AB	AA	AB
chr12_14885739_A_G	12	14885739	TOP	[A/G]	BB	BB	BB	BB	AA	BB	BB	BB
chr12_14939882_A_G	12	14939882	TOP	[A/G]	BB	BB	BB	AB	BB	BB	AA	BB
chr12_15074033_C_T	12	15074033	BOT	[T/C]	AB	BB	BB	AB	NC	AB	BB	BB
chr12_1522887_A_G	12	1522887	TOP	[A/G]	BB	AB	AB	AB	AB	AB	AA	AA
chr12_1545041_A_G	12	1545041	TOP	[A/G]	AA	AA	AB	AB	AA	AA	AB	AB
chr12_1640485_A_G	12	1640485	BOT	[T/C]	AA	AB	AB	AB	BB	AB	BB	BB
chr12_1648693_A_G	12	1648693	BOT	[T/C]	BB	AA	AA	AA	AA	AB	AA	AA
chr12_1659107_C_T	12	1659107	BOT	[T/C]	AA	AA	AA	AA	AB	AB	AB	AB
chr12_16778085_A_G	12	16778085	BOT	[T/C]	AB	BB	BB	BB	BB	BB	BB	BB
chr12_16801540_A_G	12	16801540	BOT	[T/C]	BB	BB	BB	AB	AA	BB	AB	BB
chr12_16802063_A_G	12	16802063	BOT	[T/C]	BB	BB	BB	BB	BB	BB	AB	BB
chr12_16802683_A_G	12	16802683	TOP	[A/G]	AA	AA	AA	AA	AA	AA	AB	AA
chr12_16815921_C_T	12	16815921	TOP	[A/G]	AB	AA	AA	AA	AA	AA	AA	AA
chr12_16854646_A_G	12	16854646	TOP	[A/G]	AB	AA	AA	AA	AB	AA	AA	AA
chr12_17004729_A_G	12	17004729	BOT	[T/C]	AB	AA	AA	AB	AA	AB	AB	AB
chr12_17045778_A_G	12	17045778	TOP	[A/G]	AB	BB	BB	BB	BB	AB	BB	BB
chr12_17060897_A_G	12	17060897	TOP	[A/G]	BB	AA	AA	AB	BB	BB	AB	AB
chr12_17093665_C_T	12	17093665	BOT	[T/C]	BB	AA	AA	AB	NC	BB	BB	AB
chr12_17122931_G_T	12	17122931	BOT	[T/G]	AB	AA	AA	AB	AA	BB	AA	AB
chr12_1715344_A_G	12	1715344	TOP	[A/G]	AA	AA	AB	AB	AB	AB	AB	BB
chr12_17197041_C_T	12	17197041	TOP	[A/G]	AA	AA	AA	AA	AA	AB	AA	AB
chr12_17211459_A_C	12	17211459	BOT	[T/G]	AB	BB	BB	BB	AA	AA	AA	AB
chr12_17214152_A_C	12	17214152	TOP	[A/C]	BB	BB	BB	AB	AB	BB	NC	BB
chr12_1741119_A_G	12	1741119	TOP	[A/G]	BB	AB	AB	AB	AA	AB	AB	AA
chr12_17426574_C_T	12	17426574	BOT	[T/C]	AA	BB	BB	AB	AA	AA	AA	AB
chr12_17430195_C_T	12	17430195	BOT	[T/C]	AB	BB	BB	AB	AA	AB	AB	BB
chr12_17432973_C_T	12	17432973	BOT	[T/C]	AA	AA	AA	AA	AB	AA	AA	AA
chr12_17497694_A_C	12	17497694	BOT	[T/G]	AA	BB	BB	AB	BB	AB	AA	BB
chr12_17505870_A_G	12	17505870	TOP	[A/G]	AB	AA	AA	AB	AA	BB	BB	AB
chr12_17534201_A_C	12	17534201	TOP	[A/C]	NC	AA	AA	AA	AA	AA	AB	AA
chr12_176466_C_T	12	176466	BOT	[T/C]	BB	AB	BB	BB	NC	BB	NC	BB
chr12_1765312_A_G	12	1765312	TOP	[A/G]	AA	AB	AA	AA	AA	AA	AA	AA
chr12_17889571_A_G	12	17889571	BOT	[T/C]	AB	BB	BB	BB	BB	BB	AB	BB
chr12_17894345_C_T	12	17894345	BOT	[T/C]	BB	AA	AA	AB	BB	AB	AB	AA
chr12_1792973_A_G	12	1792973	TOP	[A/G]	BB	BB	BB	BB	AB	BB	BB	BB
chr12_17932801_A_G	12	17932801	TOP	[A/G]	AA	AA	AA	AB	AB	AB	AB	AB
chr12_17961008_A_G	12	17961008	TOP	[A/G]	BB	BB	BB	AB	AA	BB	BB	BB
chr12_17979229_C_T	12	17979229	BOT	[T/C]	AB	BB	BB	AB	BB	AB	AB	BB
chr12_17982657_C_T	12	17982657	TOP	[A/G]	BB	BB	BB	AB	AA	BB	AB	BB
chr12_18022632_C_T	12	18022632	TOP	[A/G]	AB	BB	BB	BB	AA	AB	AB	AB
chr12_18040092_G_T	12	18040092	BOT	[T/G]	BB	AA	AA	AA	BB	BB	BB	AB
chr12_18072535_C_T	12	18072535	TOP	[A/G]	AA	BB	BB	AB	AA	AB	AB	BB
chr12_18093371_C_T	12	18093371	BOT	[T/C]	AA	AA	AA	AA	AA	AA	AB	AA
chr12_1818444_A_G	12	1818444	BOT	[T/C]	BB	AB	BB	BB	BB	BB	BB	BB
chr12_18202141_A_G	12	18202141	BOT	[T/C]	AA	AA	AA	AA	BB	AA	AA	AA
chr12_18228204_C_T	12	18228204	BOT	[T/C]	AA	BB	BB	AB	AA	AA	AA	AB
chr12_18281048_C_T	12	18281048	TOP	[A/G]	AB	BB	BB	BB	AA	AB	AB	BB
chr12_18281945_C_T	12	18281945	BOT	[T/C]	AB	AA	AA	AA	BB	BB	AB	AB
chr12_18475720_C_T	12	18475720	BOT	[T/C]	AA	AA	AA	AA	AA	AA	BB	AA
chr12_18478794_C_T	12	18478794	TOP	[A/G]	AB	AA	AA	AB	AA	BB	AA	AB
chr12_18530907_G_T	12	18530907	BOT	[T/G]	BB	AA	AA	AB	BB	BB	BB	AB
chr12_18564010_C_T	12	18564010	TOP	[A/G]	AB	BB	BB	BB	AA	AA	AB	BB
chr12_18593001_G_T	12	18593001	BOT	[T/G]	AA	AB	BB	BB	AA	AB	AB	BB
chr12_18629369_C_T	12	18629369	BOT	[T/C]	BB	AB	AA	AA	BB	BB	AB	AB
chr12_18643646_A_G	12	18643646	BOT	[T/C]	AB	AB	BB	BB	AA	BB	BB	BB
chr12_1868429_C_T	12	1868429	TOP	[A/G]	AA	AA	AB	AB	BB	AB	AB	BB
chr12_18843270_A_G	12	18843270	BOT	[T/C]	AB	AA	AA	AA	AA	BB	AB	AB
chr12_18845255_C_T	12	18845255	BOT	[T/C]	AB	BB	BB	BB	BB	AB	AB	BB
chr12_1884573_A_G	12	1884573	TOP	[A/G]	BB	BB	AB	AB	AB	AB	AB	AA
chr12_18874782_C_T	12	18874782	BOT	[T/C]	AB	BB	BB	BB	AA	AA	AB	AB
chr12_19007216_A_C	12	19007216	TOP	[A/C]	AA	AA	AA	AA	BB	AA	AA	AA
chr12_1902433_A_G	12	1902433	TOP	[A/G]	BB	BB	BB	BB	AA	AB	AB	AB
chr12_19425007_A_G	12	19425007	BOT	[T/C]	BB	BB	BB	BB	BB	BB	NC	BB
chr12_19426981_G_T	12	19426981	TOP	[A/C]	AB	AB	AA	AB	AA	BB	AB	AB
chr12_19496677_C_T	12	19496677	BOT	[T/C]	AA	AA	NC	AA	AA	AA	AA	AA
chr12_19514485_C_T	12	19514485	BOT	[T/C]	AB	AB	AA	AB	AA	BB	AA	AB
chr12_19533740_A_G	12	19533740	TOP	[A/G]	AB	AB	AA	AA	BB	BB	BB	AB
chr12_1959536_C_T	12	1959536	BOT	[T/C]	BB	AA	AA	AA	AA	AB	AA	AA
chr12_19602649_A_G	12	19602649	BOT	[T/C]	BB	BB	BB	BB	BB	BB	AB	BB
chr12_19603028_C_T	12	19603028	BOT	[T/C]	BB	AB	BB	BB	AA	BB	BB	BB
chr12_1960542_C_T	12	1960542	TOP	[A/G]	AA	BB	BB	BB	BB	AB	BB	BB
chr12_19626292_C_T	12	19626292	BOT	[T/C]	AB	AA	AA	AB	AA	AB	AA	AA
chr12_19712067_G_T	12	19712067	BOT	[T/G]	BB	BB	BB	AB	NC	BB	BB	BB
chr12_19727383_C_T	12	19727383	BOT	[T/C]	BB	BB	BB	AB	BB	BB	BB	BB
chr12_19728537_A_G	12	19728537	BOT	[T/C]	AA	AA	AA	AB	AB	AA	AA	AA
chr12_19751627_A_G	12	19751627	TOP	[A/G]	AA	AB	BB	BB	AA	AB	AA	AB
chr12_1976924_A_G	12	1976924	TOP	[A/G]	AA	AB	BB	BB	AA	AA	AA	AB
chr12_20039363_A_G	12	20039363	TOP	[A/G]	BB	BB	BB	BB	BB	AB	BB	AB
chr12_20062292_A_G	12	20062292	BOT	[T/C]	AA	AB	AA	AA	BB	AA	AB	AB
chr12_2006481_A_G	12	2006481	TOP	[A/G]	AA	AA	AA	AA	AA	AA	AB	AA
chr12_20097858_C_T	12	20097858	BOT	[T/C]	BB	AB	BB	BB	BB	BB	BB	BB
chr12_20152869_A_G	12	20152869	TOP	[A/G]	AA	AB	AA	AA	AA	AA	AB	AB
chr12_20169106_C_T	12	20169106	TOP	[A/G]	AA	AA	AA	AA	BB	AB	AB	AB
chr12_2020210_C_T	12	2020210	BOT	[T/C]	AA	AB	BB	BB	BB	AB	BB	BB
chr12_20234675_A_G	12	20234675	BOT	[T/C]	AA	AA	AA	AA	AA	AB	BB	BB
chr12_20247517_A_C	12	20247517	BOT	[T/G]	BB	AB	BB	BB	BB	BB	BB	BB
chr12_20248231_A_G	12	20248231	TOP	[A/G]	AB	AA	AA	AB	AB	AB	AA	AA
chr12_20278712_A_G	12	20278712	BOT	[T/C]	BB	AA	AA	AB	AA	BB	AA	AB
chr12_20306748_C_T	12	20306748	BOT	[T/C]	BB	AB	AA	AB	BB	BB	BB	BB
chr12_2034441_A_C	12	2034441	TOP	[A/C]	BB	AA	AA	AA	AA	AB	AA	AA
chr12_20386067_C_T	12	20386067	BOT	[T/C]	AA	BB	BB	AB	BB	AA	BB	AB
chr12_20403345_C_T	12	20403345	BOT	[T/C]	AA	BB	BB	AB	BB	AB	BB	BB
chr12_20435732_C_T	12	20435732	BOT	[T/C]	BB	AB	AA	AA	BB	AB	BB	AA
chr12_20440548_A_G	12	20440548	TOP	[A/G]	AB	BB	BB	AB	AA	BB	AB	AB
chr12_20464011_A_G	12	20464011	TOP	[A/G]	AB	AB	AB	AB	BB	AB	AB	AB
chr12_20528808_C_T	12	20528808	TOP	[A/G]	BB	AB	BB	BB	BB	BB	AB	BB
chr12_20529853_C_T	12	20529853	BOT	[T/C]	BB	AB	AA	AA	BB	AB	NC	AA
chr12_20595019_C_T	12	20595019	BOT	[T/C]	AB	AB	AA	AB	BB	AB	BB	BB
chr12_20646811_A_G	12	20646811	TOP	[A/G]	AA	AA	AA	AA	AA	AB	AA	AB
chr12_20669262_C_T	12	20669262	BOT	[T/C]	BB	AA	AA	AB	BB	AB	BB	AB
chr12_20675248_G_T	12	20675248	TOP	[A/C]	BB	BB	BB	BB	AA	BB	BB	BB
chr12_20755108_A_G	12	20755108	BOT	[T/C]	AA	AA	AA	AB	BB	AB	AB	AB
chr12_20766721_A_G	12	20766721	TOP	[A/G]	BB	BB	BB	BB	AA	AB	BB	AB
chr12_20815296_C_T	12	20815296	BOT	[T/C]	AA	AB	AA	AA	BB	AA	AA	AA
chr12_20830967_C_T	12	20830967	TOP	[A/G]	BB	AB	BB	BB	AA	AB	BB	AB
[truncated: 9,493 more rows]
